# Supplementary material
Source: bioRxiv or medRxiv preprint supplement (https://www.biorxiv.org/highwire/filestream/27968/field_highwire_adjunct_files/0/098871-1.pdf)
Supplement: Supplementary file [file 098871-1.pdf]

# Supplementary Information

To

## Structural landscape of base pairs containing post-transcriptional base modifications in RNA

PREETHI S. P,<sup>1</sup> PURSHOTAM SHARMA<sup>2,\*</sup> and ABHIJIT MITRA<sup>1,\*</sup>

<sup>1</sup>Center for Computational Natural Sciences and Bioinformatics, International Institute of Information Technology (IIIT), Gachibowli, Hyderabad, Telangana, 500032, India.

<sup>2</sup>Computational Biochemistry Laboratory, Department of Chemistry and Centre for Advanced Studies in Chemistry, Panjab University, Chandigarh, 160014, India.

Corresponding authors: psharma@pu.ac.in, abi\_chem@iiit.ac.in

## Table of contents

|                                                                                                                                                                           |    |
|---------------------------------------------------------------------------------------------------------------------------------------------------------------------------|----|
| <b>Section S1.</b> Details of geometrical and energetic analysis of modified base pairs .....                                                                             | 1  |
| <b>Section S2.</b> Effect of type and position of modification on base pair geometry and stability.....                                                                   | 8  |
| <b>Figure S1.</b> Distribution of modified base pairs in the RNA crystal structure dataset.....                                                                           | 10 |
| <b>Figure S2.</b> Structural alignment of crystal occurrences of modified base pairs (with occurrence frequency $\geq 10$ ) .....                                         | 11 |
| <b>Figure S3.</b> Structural alignment of crystal structures of modified base pairs (with occurrence frequency $\leq 10$ ) .....                                          | 12 |
| <b>Figure S4.</b> RMSD graph of modified base pairs of crystal and optimized geometries.....                                                                              | 13 |
| <b>Figure S5.</b> E-values graph of modified base pairs of crystal and optimized geometries.....                                                                          | 14 |
| <b>Figure S6.</b> Local intra base pair parameters graphs of modified base pairs of crystal and optimized geometries.....                                                 | 15 |
| <b>Figure S7.</b> Structural context analysis of s <sup>4</sup> U8:A modified base pair in tRNA .....                                                                     | 16 |
| <b>Figure S8.</b> Structural context of the m <sup>5</sup> U:A modified base pair.....                                                                                    | 17 |
| <b>Figure S9.</b> Structural context of the $\Psi$ :G W:WC base pair .....                                                                                                | 18 |
| <b>Figure S10.</b> Structural context of the D:U W:WC base pair .....                                                                                                     | 19 |
| <b>Figure S11.</b> Structural representation of hinge regions in tRNA .....                                                                                               | 20 |
| <b>Figure S12.</b> Illustrating effect of type and position of modification on base pair geometry and stability .....                                                     | 21 |
| <b>Table S1.</b> List of various type of RNAs searched in the dataset .....                                                                                               | 21 |
| <b>Table S2.</b> Distribution of crystal structures within the dataset .....                                                                                              | 23 |
| <b>Table S3.</b> List of PDBs with at least one modified base pair .....                                                                                                  | 24 |
| <b>Table S4.</b> List of unpaired modified bases in the crystal structure .....                                                                                           | 25 |
| <b>Table S5.</b> List of modified base pairs involving W:WC and W:WT pairing geometry .....                                                                               | 26 |
| <b>Table S6.</b> List of modified base pairs involving W:HT and W:HC pairing geometry .....                                                                               | 28 |
| <b>Table S7.</b> List of modified base pairs involving S:WC, S:WT, W:ST, H:SC, S:HT, S:SC and S:ST pairing geometry .....                                                 | 29 |
| <b>Table S8.</b> Structural context of modified base pairs in various types of RNA .....                                                                                  | 30 |
| <b>Table S9.</b> Presence of modified base pairs in structural elements of RNA .....                                                                                      | 32 |
| <b>Table S10.</b> Modified base pairs from tRNA sequence dataset .....                                                                                                    | 34 |
| <b>Table S11.</b> List of 36 unique modified base pairs identified in the dataset .....                                                                                   | 35 |
| <b>Table S12.</b> Structural deviation of modified base pairs within all crystal occurrences, with reference to optimized structure and with unmodified counterpart ..... | 36 |
| <b>Table S13.</b> Deviation of E-values of modified base pairs .....                                                                                                      | 37 |
| <b>Table S14.</b> Deviation of rotational base pair parameters of modifies base pair .....                                                                                | 38 |
| <b>Table S15.</b> Deviation of translational base pair parameters of modifies base pair .....                                                                             | 39 |
| <b>Table S16.</b> Interaction energies of modified and unmodified base pairs .....                                                                                        | 40 |
| <b>Table S17.</b> List of Triples and Quartets formed by modified base pairs .....                                                                                        | 41 |
| <b>Table S18.</b> Cartesian coordinates of the 36 modified base pair .....                                                                                                | 42 |

## SECTION S1

### Details of geometrical and energetic analysis of modified base pairs

*S1.1. Modified base pairs involving B–B interactions observe higher RMSD and better interbase hydrogen bonding within crystal occurrences, compared to those involving B–S and S–S interactions*

Analysis of RNA crystal structures reveals that 18 of the total 24 base pairs combinations involving B–B interactions have more than one occurrences. 15 of these 18 base pairs show little deviation among their respective crystal occurrences (average root mean square deviation ( $\text{rmsd}_{\text{av}}$ )  $< 0.1 \text{ \AA}$ , Supplemental Table 9, Supplemental Figure S4). However, three modified base pairs, *viz.*  $\text{m}^2_2\text{G:A W:WC}$ ,  $\text{Um:A W:WC}$  and  $\text{D:U W:WT}$ , show significantly high average rmsd values of 0.4, 0.2 and 0.2 respectively. On the other hand, 3 of the 6 modified pairs involving B–S interactions have multiple occurrences in RNA crystal structures. Within these base pairs,  $\text{s}^4\text{U:A W:ST}$  shows the highest deviation, with  $\text{rmsd}_{\text{av}}$  of  $0.2 \text{ \AA}$ , whereas  $\text{m}^7\text{G:A S:WT}$  and  $\Psi\text{:C S:WC}$  base pairs showed the lowest  $\text{rmsd}_{\text{av}}$  ( $0.1 \text{ \AA}$ ). Similarly, among 3 base pairs showing multiple occurrences among the 6 base pairs involving S–S interactions,  $\text{Gm:G S:SC}$  pair showed greatest deviation with  $\text{rmsd}_{\text{av}}$  ( $0.1 \text{ \AA}$ ), whereas the  $\text{m}^6_2\text{A:G}$  and  $\text{Am:G S:ST}$  pairs showed the least deviation with an  $\text{rmsd}_{\text{av}}$  less than  $0.04 \text{ \AA}$ .

The absolute values of average buckle ( $|\kappa_{\text{av}}|$ ) within the crystal occurrences of modified base pairs is greater for base pairs involving S–S interactions ( $12^\circ \leq |\kappa_{\text{av}}| \leq 40^\circ$ ), compared to those involving B–S interactions ( $3^\circ \leq |\kappa_{\text{av}}| \leq 35^\circ$ ) and B–B interactions ( $0^\circ \leq |\kappa_{\text{av}}| \leq 23^\circ$ ). This indicates that the involvement of ribose sugar provides greater flexibility to base pairs and results in deviation from ideal base pairing geometries. Although 8 of the 24 modified base pairs that involve B–B interactions show relatively high buckle ( $|\kappa_{\text{av}}| > 10^\circ$ , Supplemental Table S11), the deviation in buckle across all crystal occurrences of each base pair is highest for the  $\text{D:U W:WT}$  (standard deviation ( $\kappa_{\text{SD}}$ ) = 27.0) and  $\text{Um:A W:WC}$  ( $\kappa_{\text{SD}}$  = 21.4) pairs. However, the deviation in buckle parameter is relatively small among B–S interactions, and even smaller among S–S interactions.

In contrast to buckle, the absolute values of average propeller twist ( $|\pi_{\text{av}}|$ ) are higher for B–S interactions ( $4^\circ \leq |\pi_{\text{av}}| \leq 40^\circ$ ), compared to B–B ( $0^\circ \leq |\pi_{\text{av}}| \leq 22^\circ$ ) and S–S ( $3^\circ \leq \pi_{\text{av}} \leq 12^\circ$ ) interactions. Within the B–B interactions,  $|\pi_{\text{av}}|$  is relatively higher ( $> 13^\circ$ ) for two  $\text{W:WC}$  ( $\text{m}^2_2\text{G:A}$  and  $\text{Gm:A}$ ) and one  $\text{W:HT}$  ( $\text{A:m}^1\text{A}$ ) base pairs. However, 13 of the 24 B–B

interactions observe significantly small  $\pi_{av}$  ( $0^\circ \leq |\pi_{av}| \leq 5^\circ$ , Supplemental Table S11), albeit with a relatively high standard deviation ( $\pi_{SD}$ ), ( $0 \leq \pi_{SD} \leq 17$ ). On the other hand, highest  $|\pi_{av}|$  is observed in D:G W:ST base pair among B–S interactions and s<sup>4</sup>U:A S:SC base pair among S–S interactions.

The absolute values of average open angle ( $|\sigma_{av}|$ ) are higher for B–S ( $1^\circ \leq |\sigma_{av}| \leq 59^\circ$ ), compared to B–B interactions ( $4^\circ \leq |\sigma_{av}| \leq 14^\circ$ ) and S–S ( $4^\circ \leq |\sigma_{av}| \leq 39^\circ$ ) interactions. Among the B–B interactions, three W:WC base pairs (m<sup>2</sup>G:C+, m<sup>5</sup>U:G and Gm:A) showed the high  $|\sigma_{av}|$  ( $> 10^\circ$ ), whereas 6 modified base pairs possess  $|\sigma_{av}| < 1.0^\circ$ . Within the B–S interactions, base pairs containing dihydrouridine showed low  $|\sigma_{av}|$  ( $< \pm 0.1^\circ$ ), whereas lowest  $|\sigma_{av}|$  ( $4^\circ$ ) among the S–S interactions is observed in the D:U S:ST pair. Further, the trend in  $|\sigma_{av}|$  correlates with the observed trend in stretch ( $S_z$ , Supplemental Table S12), which is smaller for B–B interactions ( $2.5 \text{ \AA} < S_z < 3.0 \text{ \AA}$ ) compared to B–S ( $2.8 \text{ \AA} < S_z < 4.5 \text{ \AA}$ ) and S–S interactions ( $2.7 \text{ \AA} < S_z < 3.6 \text{ \AA}$ ).

The absolute values of average stagger ( $|S_{x(av)}|$ ) are up to 1.4 Å for B–B interactions, 0.7 Å for B–S interactions, and 1.8 Å for S–S interactions. Except for two (m<sup>2</sup>G:C+, m<sup>2</sup>G:A) W:WC base pairs with  $|S_{x(av)}|$  0.7 Å and 1.4 Å respectively, the B–B interactions observe an  $|S_{x(av)}|$  value of only up to 0.3 Å (Supplemental Table S12). In B–S interactions, three base pairs  $\Psi$ :C S:WC, A:m<sup>7</sup>G W:ST and D:G H:SC showed high  $|S_{x(av)}|$  ( $> 0.5 \text{ \AA}$ ), whereas the D:G W:ST showed the lowest  $|S_{x(av)}|$  (0.12 Å). Among the S–S interactions, the smallest  $|S_{x(av)}|$  (0.3 Å) is observed for the Am:G S:ST pair.

The absolute values of the average shear parameter ( $|S_{y(av)}|$ ) range up to 2.8 Å for B–B and B–S interactions, and up to 3.7 Å for S–S interactions. Within the B–B interactions, 7 out of 24 base pairs showed high  $|S_{y(av)}|$  ( $\sim 2.0 \text{ \AA}$ ), whereas 5 base pairs showed low  $|S_{y(av)}|$  ( $< 0.1 \text{ \AA}$ ). In the B–S interactions, the highest  $|S_{y(av)}|$  is observed for the A:m<sup>7</sup>G W:ST pair (2.8 Å), whereas D:G H:SC showed the lowest  $|S_{y(av)}|$  (0.2 Å). Similarly, in the S–S interactions, D:U S:ST showed the highest  $|S_{y(av)}|$  (3.7 Å), whereas s<sup>4</sup>U:A S:ST showed the lowest  $|S_{y(av)}|$  (1.2 Å, Supplemental Table S13).

In addition to the analysis of geometrical variations of each modified base pair in different macromolecular crystal contexts, it is important to analyse the deviation in inter base hydrogen bonding interactions within different crystal occurrences (Supplemental Table S10). For this, we measured the E–value ( $E_{av}$ ) of base pair occurrences in crystal contexts (See Materials and Methods section).  $E_{av}$  is a quantitative parameter which measures the quality

of hydrogen bonds between the pairing bases, where smaller  $E_{av}$  indicates better base pairing. Our analysis reveals that the average  $E_{av}$  of base pairs involving B–B interactions (0.1 and 1.0) are smaller than those involving B–S (0.4 and 1.3) and S–S (0.7 and 1.2) interactions. Among the 24 B–B interactions, 7 base pairs possess  $E_{av} < 0.3$ , whereas three modified base pairs  $m^2G:C^+ W:WC$ ,  $m^5U:G W:HT$  and  $m^1A:m^5U H:WT$  possess high  $E_{av}$  (between 0.8 and 1.0). Within the B–S interactions, 2  $W:ST$  ( $A:m^7G$  and  $s^4U:A$ ) and  $\Psi:C S:WC$  base pairs possess high  $E_{av}$  ( $\sim 1.0$ ), whereas the other three B–S interactions have  $E_{av}$  ranging between 0.4 and 0.7. Except  $Am:G S:ST$  ( $E_{av} = 0.7$ ), all S–S interactions possess high  $E_{av}$  ( $>1.0$ ).

### *S1.2. Crystal geometries of some modified base pairs deviate significantly compared to isolated optimized geometries*

Geometry optimizations were carried out starting from crystal geometry to understand deviation in base pair geometries in RNA crystal structures from their respective isolated geometries optimized using quantum chemical methods reveals that the  $rmsd_{av}$  ranges between 0.0 Å and 1.2 Å for B–B interactions, 0.1 Å and 0.3 Å for B–S interactions and 0.2 Å and 0.7 Å for S–S interactions (Supplemental Table 9, Supplemental Figures S2, S3 and S4). Within the B–B interactions, two  $W:WC$  pairs ( $m^2G:A$  and  $Um:A$ ) pairs exhibit the highest  $rmsd_{av}$  (0.8 Å and 1.2 Å respectively). However, although 7 pairs observe moderate conformational changes ( $rmsd_{av}$  between 0.3 and 0.1), 15 pairs deviate insignificantly ( $rmsd_{av} < 0.1$  Å) on optimization. Within the B–S interactions,  $\Psi:C S:WC$  showed relatively low  $rmsd_{av}$  (0.15 Å), whereas  $s^4U:A W:ST$  and  $H:SC$  base pairs showed high  $rmsd_{av}$  ( $\sim 0.3$  Å). Within the S–S interactions,  $D:U S:ST$  show the highest deviation ( $rmsd_{av} = 0.7$  Å), whereas  $Gm:G S:SC$  and  $m^7G:A S:ST$  showed the lowest deviation ( $rmsd_{av} = 0.2$  Å).

19 out of 24 pairs involving B–B interactions show decrease in buckle, whereas 5 pairs show slight increase in buckle after optimization. However, within the B–S interactions, although three base pairs ( $(s^4U:A, D:G) W:ST$  and  $Um:G H:SC$ ) exhibit decrease in buckle ( $|\kappa_{av}| = 8.4^\circ, 17.6^\circ$  and  $0.5^\circ$  respectively) on optimization, there is significant increase in buckle in  $\Psi:C S:WC$ ,  $A:m^7G S:ST$  and  $D:G H:SC$  pairs ( $|\kappa_{av}| = 38.8^\circ, 53.2^\circ$  and  $32.7^\circ$  respectively) on optimization. On the other hand, in the S–S interactions, all the pairs showed large increase in buckle after optimization (Supplemental Table 11).

In contrast, 15 out of 24 pairs show decrease in propeller after optimizations ( $0^\circ \leq |\pi_{av}| \leq 1^\circ$  on optimization). Although 7 out of 24 modified base pairs showed moderate increase in

propeller, two W:WT modified base pairs (D:U and m5C:G) showed very high increase in propeller after optimization ( $|\pi_{av}|$  of 23.4° and 39.6° respectively). Within B–S interactions, two pairs ( $\Psi$ :C S:WC and A:m7G S:ST) showed decreased  $|\pi_{av}|$  (upto 12°) on optimization, whereas the other pairs showed increase in  $|\pi_{av}|$ . Among these, two pairs D:G W:ST and Um:G H:SC exhibited high increase in  $\pi_{av}$  on optimization (upto 20°). Within S–S interactions, m62A S:ST showed no change in  $|\pi_{av}|$ , two pairs (Gm:G S:SC and D:U S:ST) observe decrease in  $|\pi_{av}|$ , whereas other pairs exhibit increase in  $|\pi_{av}|$  on optimization (Supplemental Table 11).

13 out of 24 pairs of B–B interactions showed decrease in  $|\sigma_{av}|$ , in contrast with other base pairs on optimization. Within B–S interactions, three pairs (A:m7G W:ST, s4U:A W:ST and Um:G H:SC) exhibited decrease in  $|\sigma_{av}|$ , whereas three pairs (D:G W:ST, D:G H:SC and  $\Psi$ :C S:WC) exhibited high increase in  $|\sigma_{av}|$  on optimization. In S–S interactions, two S:ST pairs (m62A:G and m7G:A) showed decrease in  $|\sigma_{av}|$  (upto 15°), whereas two pairs (Gm:G S:SC and D:U S:ST) showed tremendous increase in  $|\sigma_{av}|$  (>14°) on optimization (Supplemental Figure S5).

7 out of 24 pairs observe decrease in  $S_{x(av)}$  and 16 out of 24 pairs in B–B interactions showed insignificant change in  $S_{x(av)}$  (< 0.2 Å) on optimization, however D:U W:WT showed slight increase in  $S_{x(av)}$  (~ 0.3 Å). Within B–S interactions, 4 out of 6 pairs showed increase in  $S_{x(av)}$  on optimization and in contrast, D:G H:SC showed decrease in  $S_{x(av)}$  on optimization. Within S–S interactions, four pairs showed decrease in  $S_{x(av)}$  and two pairs showed increase in  $S_{x(av)}$  on optimization (Supplemental Table 12).

5 out of 24 base pair showed increase in  $S_{y(av)}$  and 9 out of 24 pairs showed decrease in  $S_{y(av)}$  and others showed no change on optimization. Within B–S interactions, 4 out of 6 pairs exhibited decrease in  $S_{y(av)}$  and 2 pairs (s4U:A W:ST and D:G H:SC) showed increase in  $S_{y(av)}$  on optimization. Within S–S interactions, three pairs exhibited decrease in  $S_{y(av)}$  and two pairs exhibited no change in  $S_{y(av)}$ , however D:U S:ST showed increase in  $S_{y(av)}$  on optimization. With the exception of s4U:A S:SC where  $S_{z(av)}$  increased, all the base pairs showed insignificant change in  $S_{z(av)}$  on optimization.

The  $E_{av}$  ranges between 0.1 and 0.6 for B–B interactions, 0.3 and 1.5 for B–S interactions and 0.9 and 1.2 for S–S interactions. With the exception of  $\Psi$ :G W:WC where  $E_{av}$  increased, 19 base pairs observe low  $E_{av}$  and four pairs showed insignificant change in

$E_{av}$  on optimization. Within B–S interactions, with the exception of D:G H:SC where  $E_{av}$  increased, all the base pairs observe low  $E_{av}$  on optimization. All the pairs in S–S interactions showed low  $E_{av}$  on optimization (Supplemental Figure S4).

### *S1.3. Comparison of geometries of modified and unmodified base pairs highlight the effect of base modification.*

The  $rmsd_{av}$  between optimized geometries of modified and unmodified base pairs ranges between 0.0 Å and 1.5 Å for B–B interactions, 0.0 Å and 0.4 Å for B–S interactions and 0.3 Å and 2.1 Å for S–S interactions. Among B–B interactions, two W:WC base pairs  $\Psi$ :G and  $m^2$ G:C+ showed highest deviation ( $rmsd_{av}$  = 1.5 Å and 1.4 Å respectively). However, the modified and unmodified geometries of 13 out of 24 base pairs are very similar ( $rmsd_{av}$  < 0.1 Å). Among B–S interactions, two W:ST ( $s^4$ U:A and D:G) pairs, D:G H:SC and  $\Psi$ :C S:WC showed significant deviation ( $rmsd_{av}$  > 0.1 Å). However, A: $m^7$ G W:ST and Um:G H:SC are very similar to their unmodified counterparts ( $rmsd_{av}$  ~ 0.03 Å). Among S–S interactions, Gm:G S:SC and  $m^6_2$ A:G S:ST showed relatively greater variation ( $rmsd_{av}$  = 2.1 Å and 1.7 Å respectively), whereas  $s^4$ U:A S:SC and two S:ST (Am:G and  $m^7$ G:A) pairs showed the lowest deviation ( $rmsd_{av}$  < 0.6 Å, Supplemental Table 09).

In B–B interactions, 19 out of 24 modified base pairs showed  $E_{av}$  similar to unmodified base pairs with minute difference ( $\Delta E_{av} \leq 0.1$ , Supplemental Table 10). However, 4 out of 24 pairs exhibited minute increase in E (upto 0.4) and  $m^7$ G:G W:HT showed low E, with respect to their counterparts. In B–S interactions, three pairs ( $s^4$ U:A W:ST, D:G W:ST, and Um:G H:SC) were similar to unmodified structures ( $\Delta E_{av} \leq 0.2$ ), whereas the other pairs showed high E than unmodified counterparts ( $\Delta E_{av} \sim 1.0$ ). Within S–S interactions, all the pairs of S:ST family showed similar  $E_{av}$  to unmodified counterparts, whereas S:SC pairs showed high E than the unmodified counterpart ( $\Delta E_{av} \leq 0.6$ , Supplemental Table 10)

17 out of 24 B–B pairs have high  $\kappa$  compared to their unmodified counterparts. On the other hand, although  $m^2_2$ G:A W:WC as well as three W:HT ( $m^5$ Um:A, Um:A and D:U) pairs showed high  $\kappa$ , both in their crystal and optimized structures, where their respective unmodified structures are close to planar ( $\kappa \sim 0^\circ$ ). Although most of the B–B and S–S interactions exhibited high  $\kappa$  than their unmodified counterparts,  $\kappa$  is low in modified B–S base pairs.

In 22 of the 24 B–B pairs, propeller twist ( $\pi$ ) remains same as their unmodified counterpart. However, 2 pairs (A: $m^1$ A W:HT and D:U W:WT) showed significant increase in

$\pi$  (upto 23.0°) upon modification. In B–S interactions, although  $\pi$  decreases slightly (up to 7°) in two base pairs ( $\Psi$ :C S:WC and A:m<sup>7</sup>G W:ST), remaining four pairs (s<sup>4</sup>U:A W:ST, D:G W:ST, D:G H:SC and Um:G H:SC) observe (up to 54°) increase in propeller on modification. However, within the S–S interactions, all pairs observe increase in  $\pi$  (upto 10°) on modification.

8 out of 24 B–B pairs showed increase in open on modification. Among these, m<sup>2</sup>G:C+ W:WC pair showed high  $\sigma$  on modification. However, 9 B–B pairs observed similar  $\sigma$  to unmodified pairs. On the other hand, 13 pairs showed decrease in open on modification. In B–S interactions, three modified base pairs showed significant increase in open on modification. However the other three base pairs ( $\Psi$ :C S:WC, D:G W:ST and Um:G H:SC), showed high open on modification ( $\sigma_{av}$  –32.9°, –31.0° and –2.1° respectively). In S–S interactions, 5 out of 6 modified base pairs showed increase in open on modification. However, s<sup>4</sup>U:A S:SC showed decrease in open on modification (Supplemental Table 11).

#### *S1.4. Interaction energies of modified base pairs and their comparison to unmodified base pairs.*

Interaction energies of modified base pairs range between –43.4 and –9.8 kcal/mol. In B–B interactions, with the exception of protonated base pair m<sup>2</sup>G:C+ W:WC, the interaction energy range between –38.5 and –9.8 kcal/mol. Six W:WC (m<sup>7</sup>G:C, m<sup>7</sup>G:G, m<sup>5</sup>C:G, Gm:C, m<sup>2</sup>G:C and Cm:Gm) and m<sup>7</sup>G:G W:HT modified base pairs have high interaction energy and identified to be greater than –27.0 kcal/mol. In six W:WC (m<sup>2</sup>G:U, m<sup>2</sup><sub>2</sub>G:A,  $\Psi$ :G, Um:A, m<sup>5</sup>U:G and Gm:A) and five W:HT (m<sup>5</sup>U:A,  $\Psi$ :A, m<sup>5</sup>Um:m<sup>1</sup>A, A:m<sup>1</sup>A, s<sup>4</sup>U:A and Um:A) modified base pairs, the interaction energies were moderate and range between –23.30 and –15.4 kcal/mol. In  $\Psi$ :A W:WC, m<sup>5</sup>U:G W:HT and W:WT (D:U and m<sup>5</sup>C:G) modified base pairs the interaction energy is relatively low and range between –14.8 and –9.8kcal/mol. In B–S interactions, It is observed that, W:ST modified base pairs A:m<sup>7</sup>G and D:G, showed relatively high interaction energy of –22.5 and –15.4 kcal/mol respectively. Rest of the modified base pairs,  $\Psi$ :C S:WC, s<sup>4</sup>U:A W:ST and H:SC (D:G and Um:G) showed moderate interaction energies that range between –14.6 and –12.6 kcal/mol. In S–S interactions, m<sup>7</sup>G:A S:ST showed highest interaction energy of –34.9 kcal/mol, subsequently S:SC (Gm:C and s<sup>4</sup>U:A) and three S:ST (m<sup>6</sup><sub>2</sub>A:G, Am:G and D:U) modified base pairs showed interaction energies within range of –21.5 and –15.9 kcal/mol (Supplemental Table S13).



Interaction energy difference between modified and unmodified base pairs range between –15.3 and 6.3 kcal/mol. In B–B interactions, the interaction energy difference range between –15.30 and 0.86 kcal/mol. In base pair interactions involving positive charge bases such as m<sup>7</sup>G:C W:WC, four W:HT (m<sup>7</sup>G:G, m<sup>1</sup>A:m<sup>5</sup>U, m<sup>1</sup>A:m<sup>5</sup>Um and m<sup>1</sup>A:A), m<sup>7</sup>G:A S:WT and m<sup>7</sup>G:A S:ST the difference in modified and unmodified base pairs range between –6.0 and –15.30 kcal/mol. In W:WC and W:WT base pairs, the change in interaction energy in most of the base pairs is less than  $\pm 1.0$  kcal/mol, however slight increase in interaction energy is observed in four W:WC base pairs m<sup>2</sup>G:C+, m<sup>2</sup><sub>2</sub>G:A,  $\Psi$ :G and Cm:Gm. In W:HT base pairs, there is significant increase in interaction energy upon modification in base pairs m<sup>5</sup>U:A,  $\Psi$ :A and s<sup>4</sup>U:A. In B–S interactions, the change in interaction energy range between –6.00 and 6.00 kcal/mol, upon modification there is decrease in interaction energy in  $\Psi$ :C S:WC and D:G W:ST base pairs. In S–S interactions, the change in interaction energy range between –13.91 and 1.1 kcal/mol, Gm:G S:SC showed decrease interaction energy.

Overall, not only the protonated base pair m<sup>2</sup>G:C(+) W:WC showed high interaction energy of –43.37 kcal/mol but also the base pair interactions that involve positively charged bases such as m<sup>1</sup>A and m<sup>7</sup>G. In these interactions, the interaction energy is relatively high and the energy difference between the modified and unmodified base pairs range between –6.0 and –15.3 kcal/mol. In case of sugar methylations, 2'-O-ribose methyl modifications slightly effected the base pair stability and the change in interaction energy range between –2.2 and 1.1 kcal/mol (Supplemental Table 13).

## **SECTION S2.** Effect of type and position of modification on base pair geometry and stability.

### *S2.1. Uridine modifications reveal the effect of type of modification on the base pair geometry and stability*

As mentioned earlier, our study reveals that a significant fraction of modified base pairs in RNA involve the modification of either uridine (rU) nucleoside. This natural variety in base pair structures containing uridine modifications can be utilized to analyze the effect of the type of base modification on the geometry and stability of base pairs. Specifically, our crystal structure analysis revealed six distinct modified forms of the U:A W:HT base pair, viz. s<sup>4</sup>U:A, Ψ:A, m<sup>5</sup>U:A, m<sup>5</sup>U:m<sup>1</sup>A, m<sup>5</sup>Um:m<sup>1</sup>A and Um:A, each of which contain a different uridine modification (Supplemental Figure 10). Whereas pseudouridylation leads to increase in N1–N9 distance, sugar methylation increases the RMSD between the crystal occurrences upto 0.3 Å. Similarly, buckle parameter is also relatively high in m<sup>5</sup>Um:A (7.9°) and Um:A (3.8°) base pairs.

Upon modification, U:A modified base pairs that are composed of charged bases showed high increase in interaction energies. For example, m<sup>5</sup>U:m<sup>1</sup>A base pair possess stronger interaction (by 7.4 kcal/mol) compared to the U:A pair. However, on addition of extra methyl substituent at 2'-O-ribose of m<sup>5</sup>U (in m<sup>5</sup>Um:m<sup>1</sup>A), the interaction energy is 5.9 kcal/mol lower compared to the unmodified counterpart. This might be attributed to change in structure with sugar methylation. In Um:A, slight decrease in energy was observed due to changes in structure upon sugar methylation.

### *S2.2. Guanosine, cytidine and adenosine modifications illustrate the effect of position of modification on the base pair geometry and stability*

Our database analysis reveals five examples of modified base pairs corresponding to the native G:C W:W cis pair, viz. m<sup>2</sup>G:C, m<sup>2</sup>G:C+, m<sup>7</sup>G:C, G:m<sup>5</sup>C, Gm:C and Gm:Cm, and three modified base pairs corresponding to the A:G S:ST base pair, viz. m<sup>6</sup><sub>2</sub>A:G, Am:G and A:m<sup>7</sup>G which differ in the position of modification on the interacting nucleobase.

All five modifications of the G:C W:WC pairs (Supplemental Figure 10, Supplemental Table S14) possess very similar geometries to that of unmodified pair with rmsd<sub>av</sub> within 0.01 Å, and similar N9-N1 distances. Moreover, the binding energy of the m<sup>2</sup>G:C, m<sup>5</sup>C:G and Gm:C pairs are very similar to unmodified base pair, with interaction energy change of <1.0 kcal/mol. However, the presence of (positively charged) m<sup>7</sup>G base in the m<sup>7</sup>G:C pair likely

increases the electrostatic interactions between the pairing nucleobases, which enhances the interaction energy by 15 kcal/mol, compared to the unmodified base pair.

In context of the modifications at the A:G S:ST base pair, three modified variants that include single methyl substituted at positions N7 of Guanine ( $m^7G$ ) or 2'-O-ribose of Adenine (Am) or dimethyl substituent at N6 of exocyclic amino group of adenine ( $m^6_2A$ ) were identified. Crystal structures showed low  $rmsd_{av}$  of 0.02 Å and deviation in geometry was observed upon optimization ( $0.2 \text{ \AA} < rmsd_{av} < 0.4 \text{ \AA}$ ). However,  $m^6_2A:G$  S:ST showed much deviation in geometry from unmodified structure with  $rmsd_{av}$  of 1.7 Å and the other two Am:G and A: $m^7G$  showed less deviation from unmodified structure with  $rmsd_{av}$  0.3 Å and 0.5 Å respectively. The observed base pair parameters buckle ( $\kappa$ ), open ( $\sigma$ ) and propeller ( $\pi$ ) for these modified base pair are very high. These structures showed high E-values ( $\sim 1.0$ ). Sugar methylated base pair, Am:G S:ST showed slight decrease in interaction energy ( $\sim 1$  kcal/mol), whereas the charged base pair  $m^7G:A$  S:ST showed high increase in interaction energy ( $\sim 14$  kcal/mol). Dimethyl modification in  $m^6_2A:G$  had not affected the stability of the base pair as the interaction energy is similar to unmodified base pair.

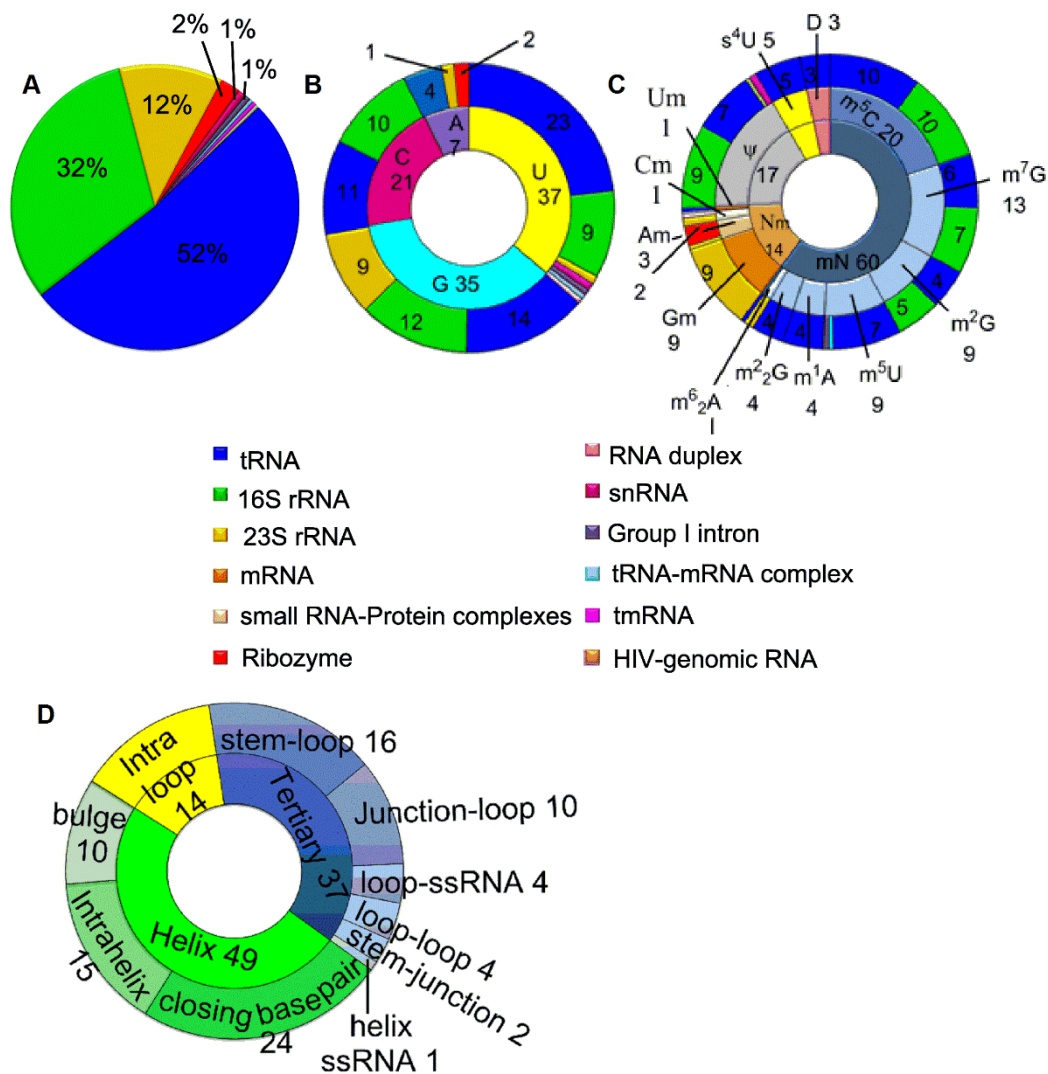

**FIGURE S1.** (A) Distribution of 453 modified base pairs as a function of type of RNA. (B) Distribution of modified base pairs as function of nucleotide that undergoes modification (first layer), and their occurrence in various types of RNA (second layer). (C) Distribution of modified base pairs based on type of modification (first and second layers) and their occurrence in various types of RNA (third layer). (D) Percentage distribution of 453 modified base pairs as function of secondary structural elements.

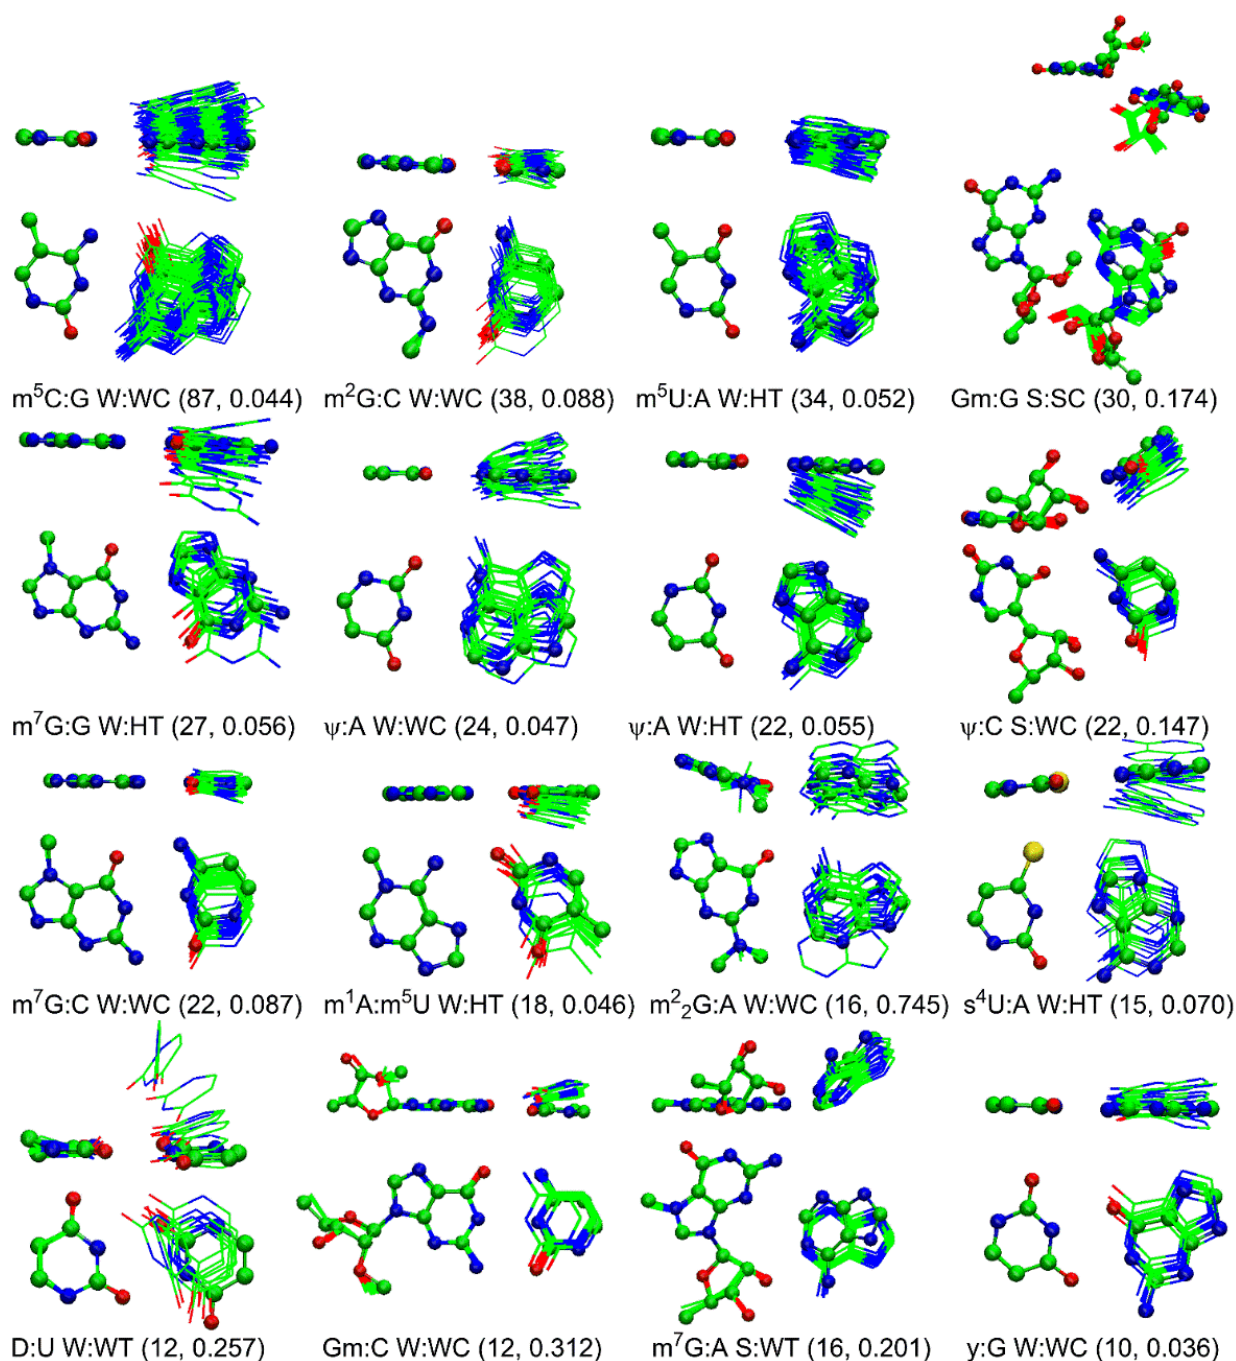

**FIGURE S2.** Structural alignment of crystal occurrences of modified base pairs (with occurrence frequency  $\geq 10$ ) with their corresponding optimized structures. Occurrence frequency and average RMSD with respect to the optimized structure (in Å) given in parenthesis.

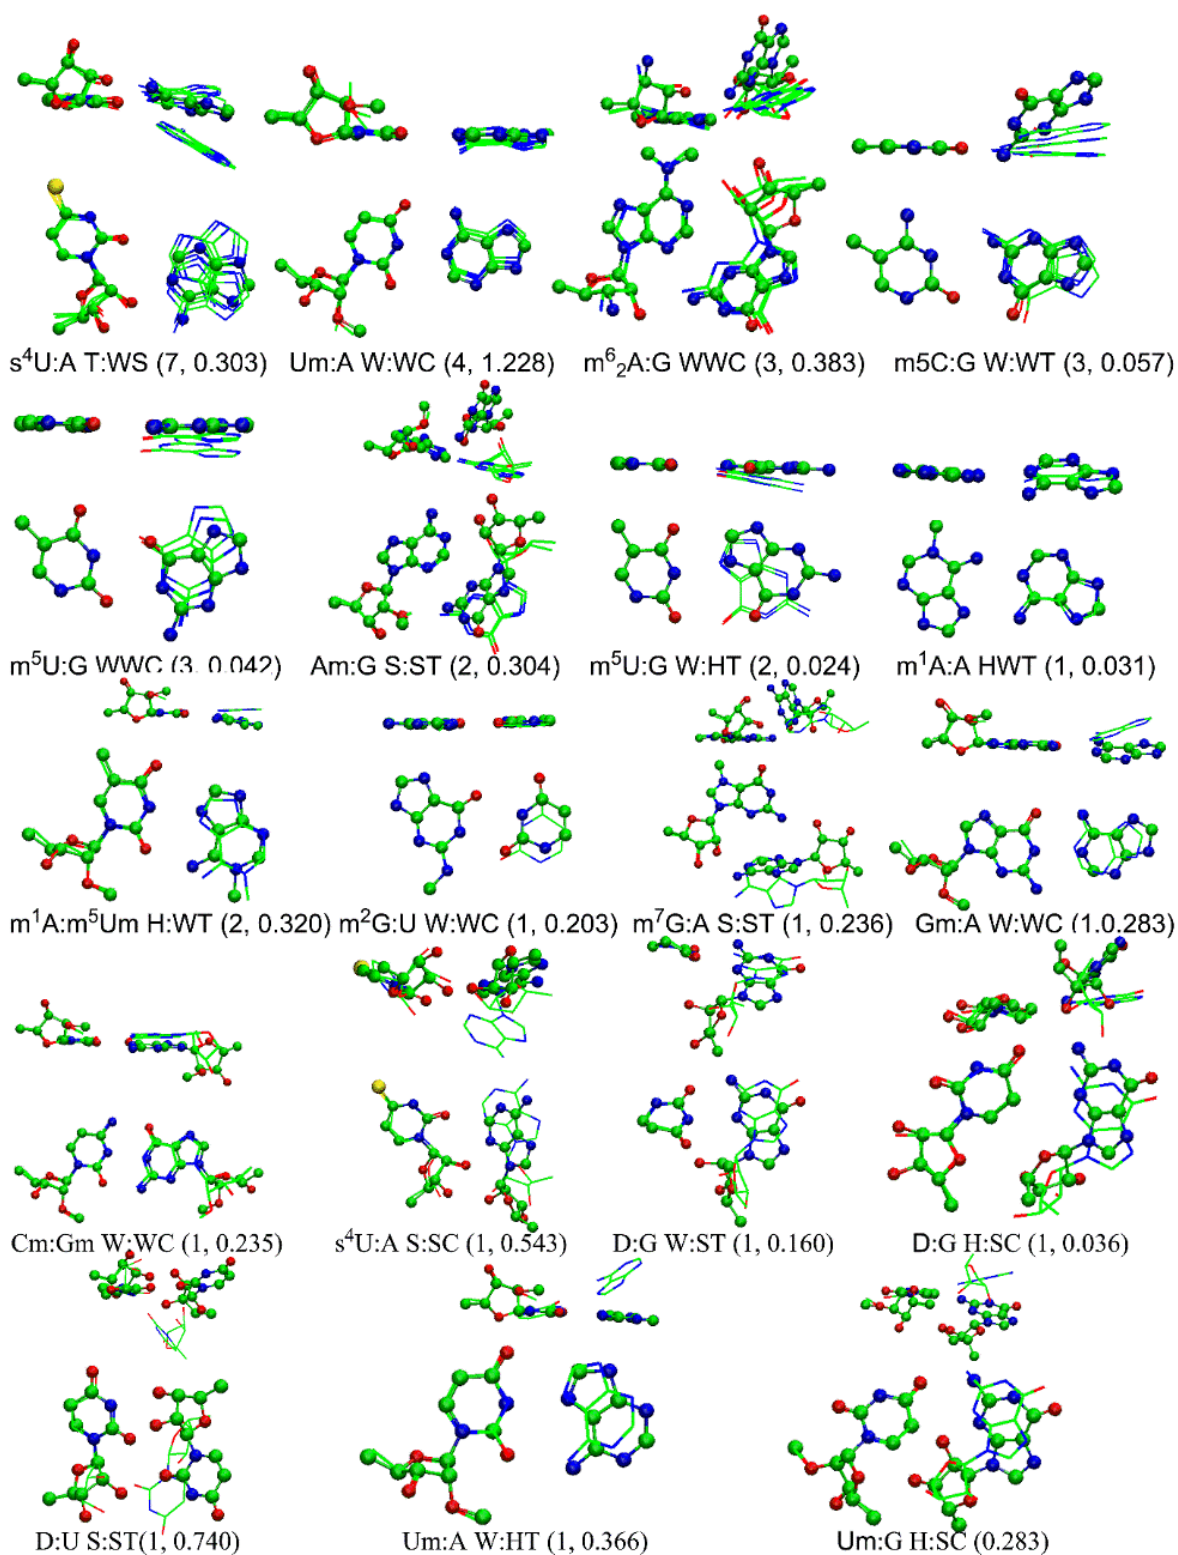

**FIGURE S3.** Structural alignment of crystal structures of modified base pairs (with occurrence frequency  $\leq 10$ ) with their corresponding optimized structures. Occurrence frequency and RMSD (in Å) given in parenthesis.

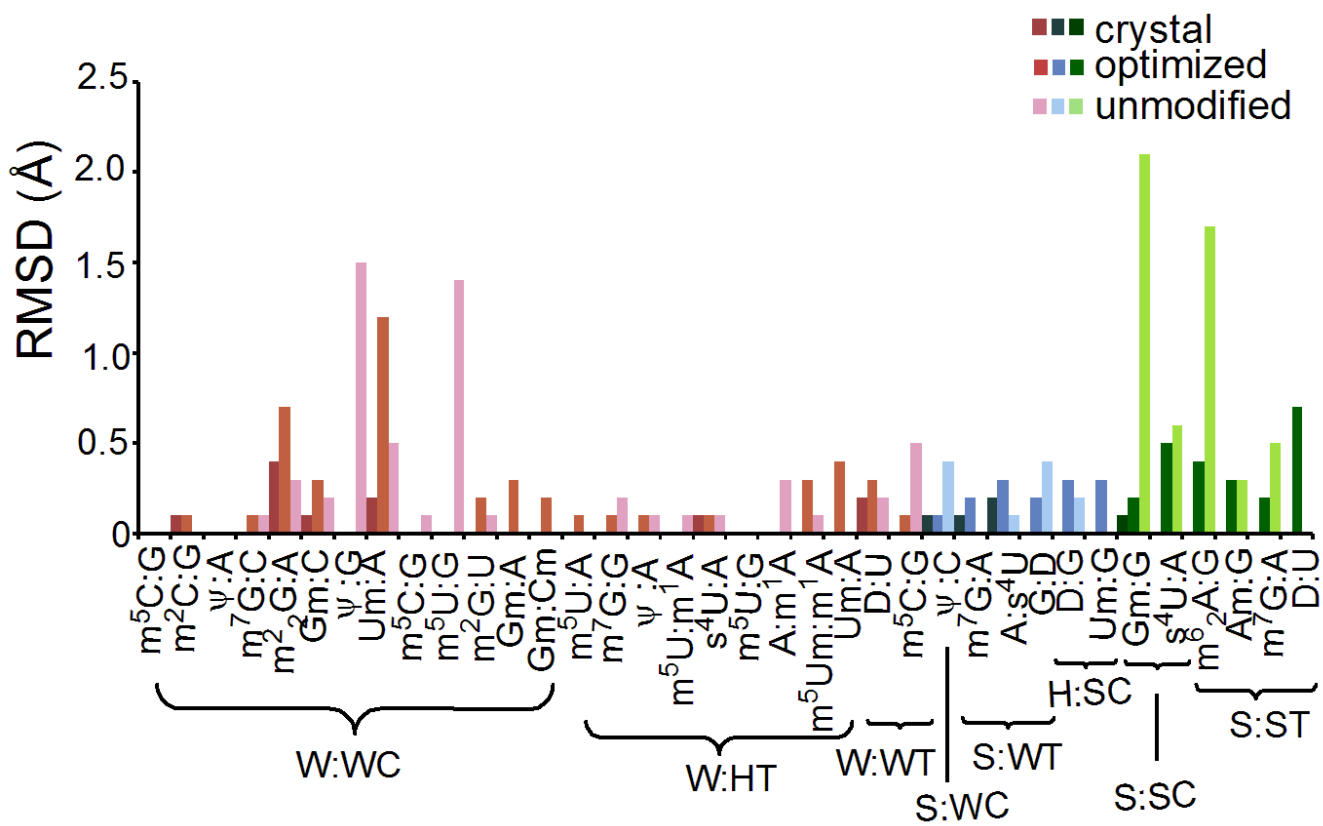

**FIGURE S4.** Average RMSD within the crystal occurrences of each base pair.

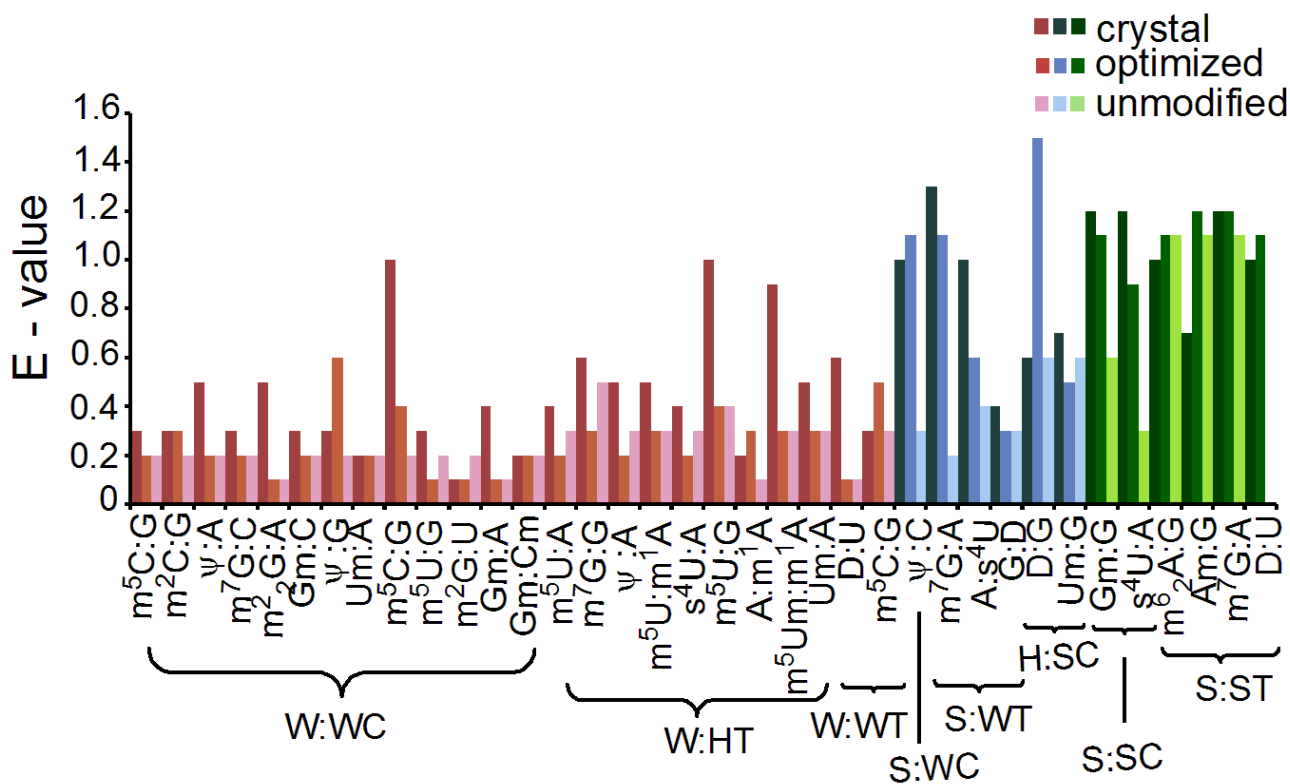

**FIGURE S5.** Average E-value of the crystal geometries of each base pair with respect to the optimized structure.



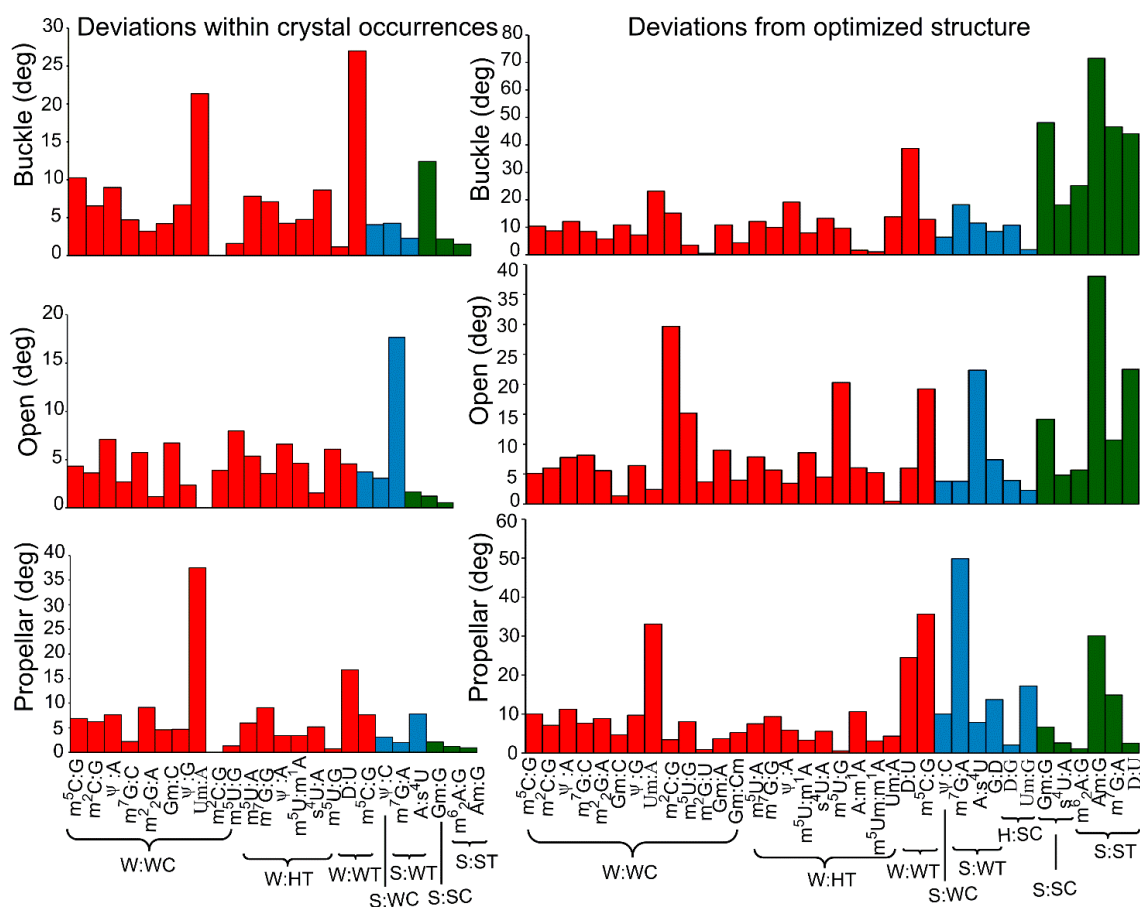

**FIGURE S6.** Graphs representing average RMS deviation and standard deviation of local intra base pair parameters buckle ( $\kappa$ ), open ( $\sigma$ ) and propellar ( $\pi$ ). Colour coding according to the base pair interactions – B–B interactions (red), B–S interactions (blue) and S–S interactions (green).

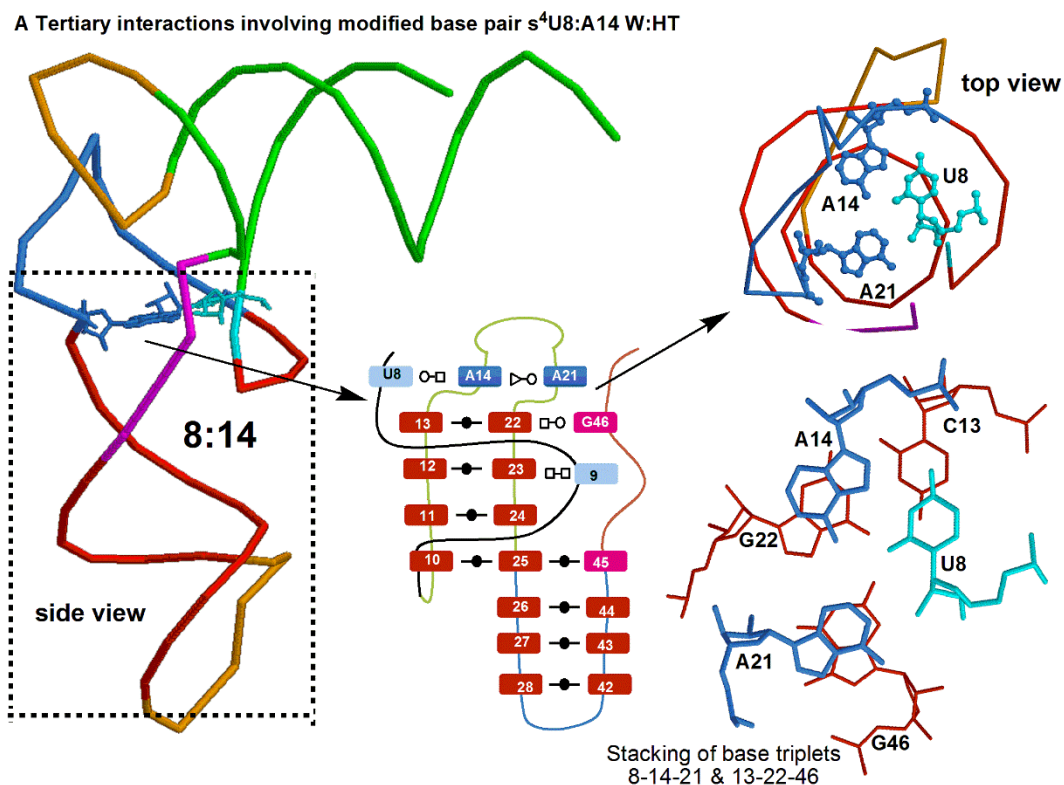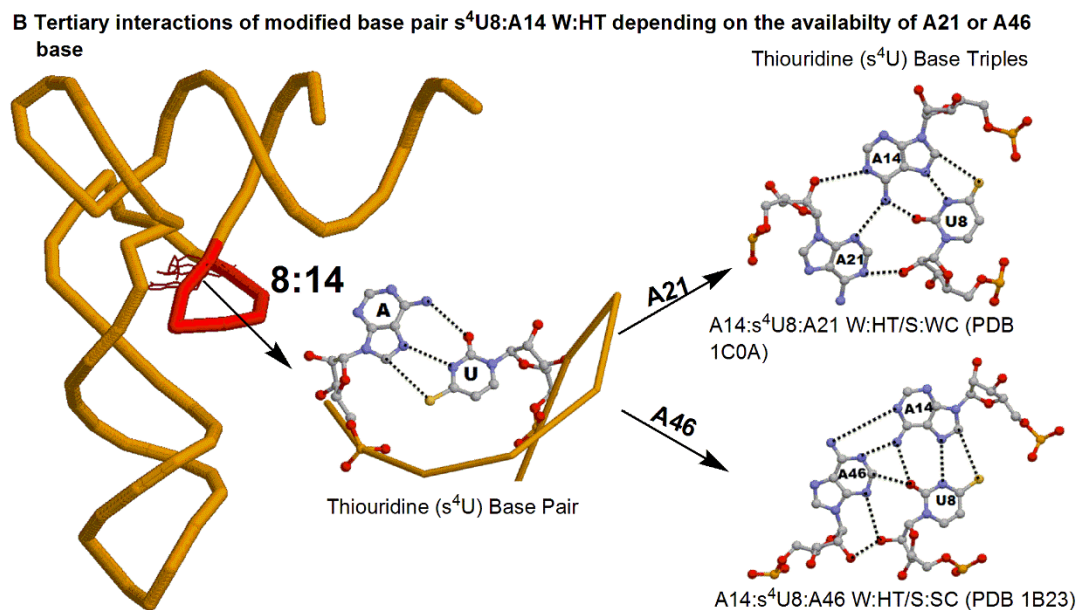

**FIGURE S7.** Structural context analysis of s<sup>4</sup>U8:A14 W:HT modified base pair in tRNA. (A) 4-thiouridine base pair positioned at 8:14 of tRNA, interacts with A21 nucleobase and forms a 8:14:21 base triple. The base triple is stacked upon other triplet 13:22:46 (PDB 1C0A). (B) Alternate tertiary interactions, where the modified base pair interacts with base 46, forming the 8:14:46 base triple (PDB 1B23).

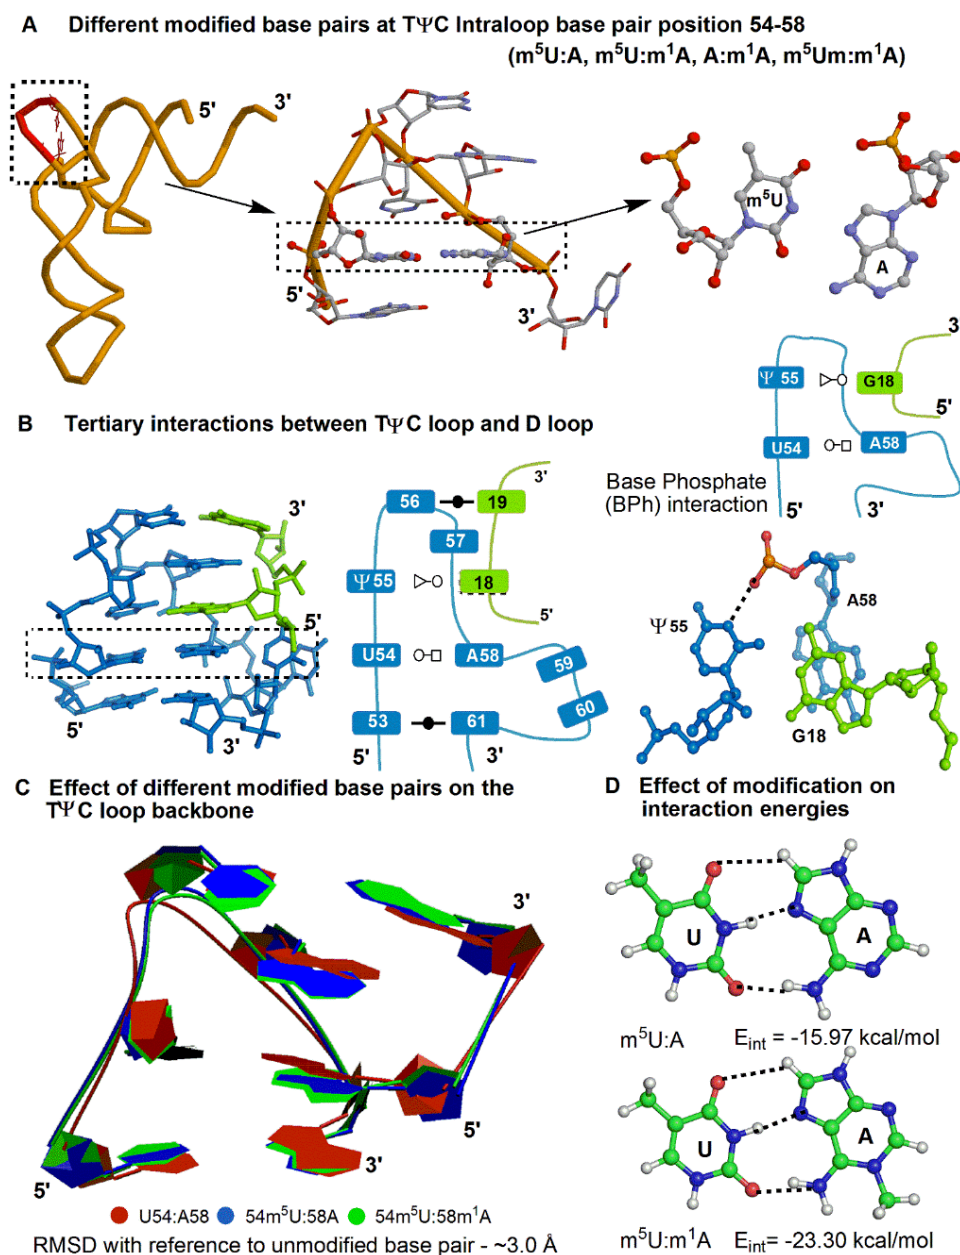

**FIGURE S8.** Structural context of the  $m^5U$  modified base pair in the T-loop of tRNA. (A) tRNA T $\Psi$ C loop showing the 54:58 base pair. (B) Kissing loop interaction between the T $\Psi$ C loop and the D-loop, stabilized by two base pairs, 18:55 and 19:56, along with a base phosphate (BPh) interaction between  $\Psi 55:A58$  (PDB 1EFW). (C) Backbone alignment of the T $\Psi$ C loop in presence of U:A,  $m^5U:A$  and  $m^5U:m^1A$  at 54:58 position. (D) Geometry and interaction energies of  $m^5U:A$  and  $m^5U:m^1A$  base pairs.

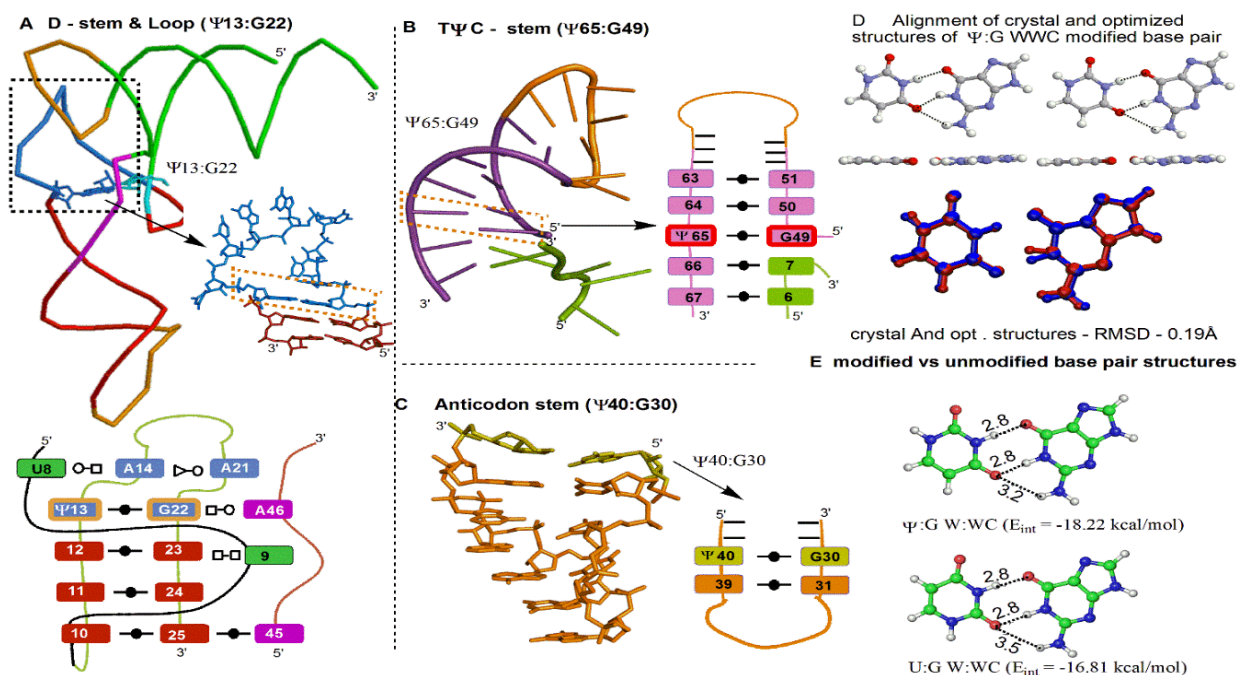

**FIGURE S9.** Structural context of the Ψ:G W:WC base pair as the closing base pair (A) at position 13:22 of D–stem of tRNA. (B) at position 65:49 of the TΨC stem of tRNA. (C) at position 40:30 of the anticodon stem in tRNA. (D) Comparison of crystal and optimized structures of the Ψ:G W:WC base pair. (E) Geometry and interaction energies of the Ψ:G W:WC base pair and its unmodified counterpart U:G W:WC base pair.

**A** Structural context of dihydrouridine base pair D20:U59 in tRNA D loop

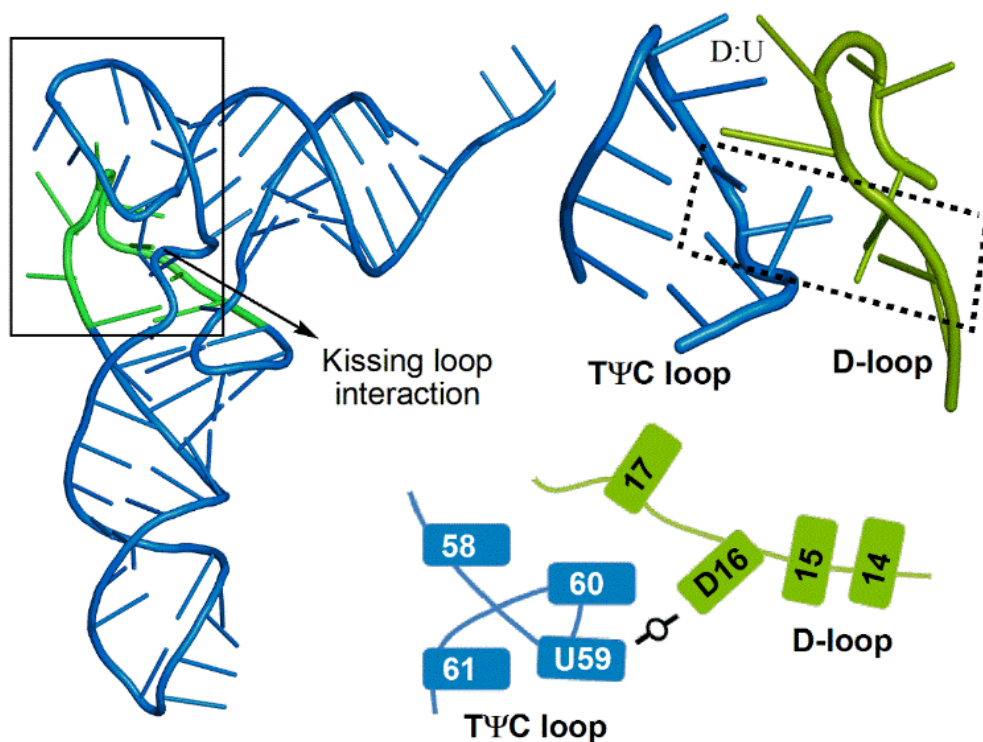

**B** Interaction of dihydrouridine with T loop in tRNA

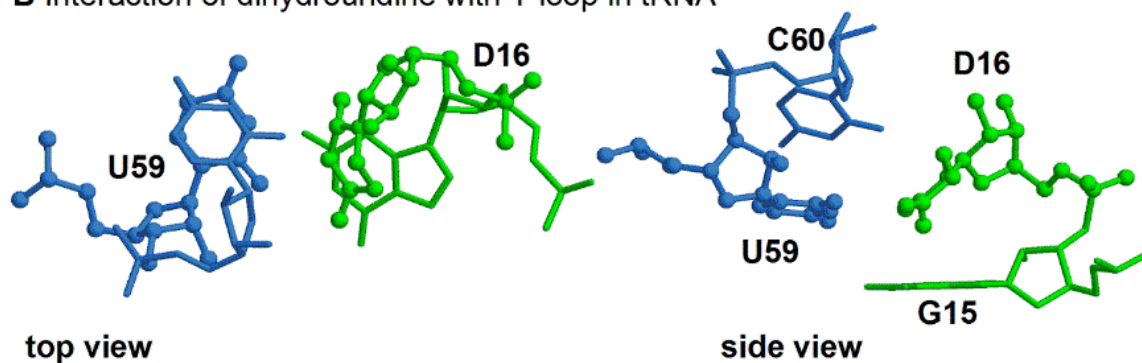

**FIGURE S10.** Structural context of tertiary interactions of dihydrouridine modified base at position 16:59. (A) D16:U59 W:WT base pair at the interface of D-loop and T-loop of tRNA. (B) Tertiary interactions of D16 and U59 in tRNA (PDB 1ASY).

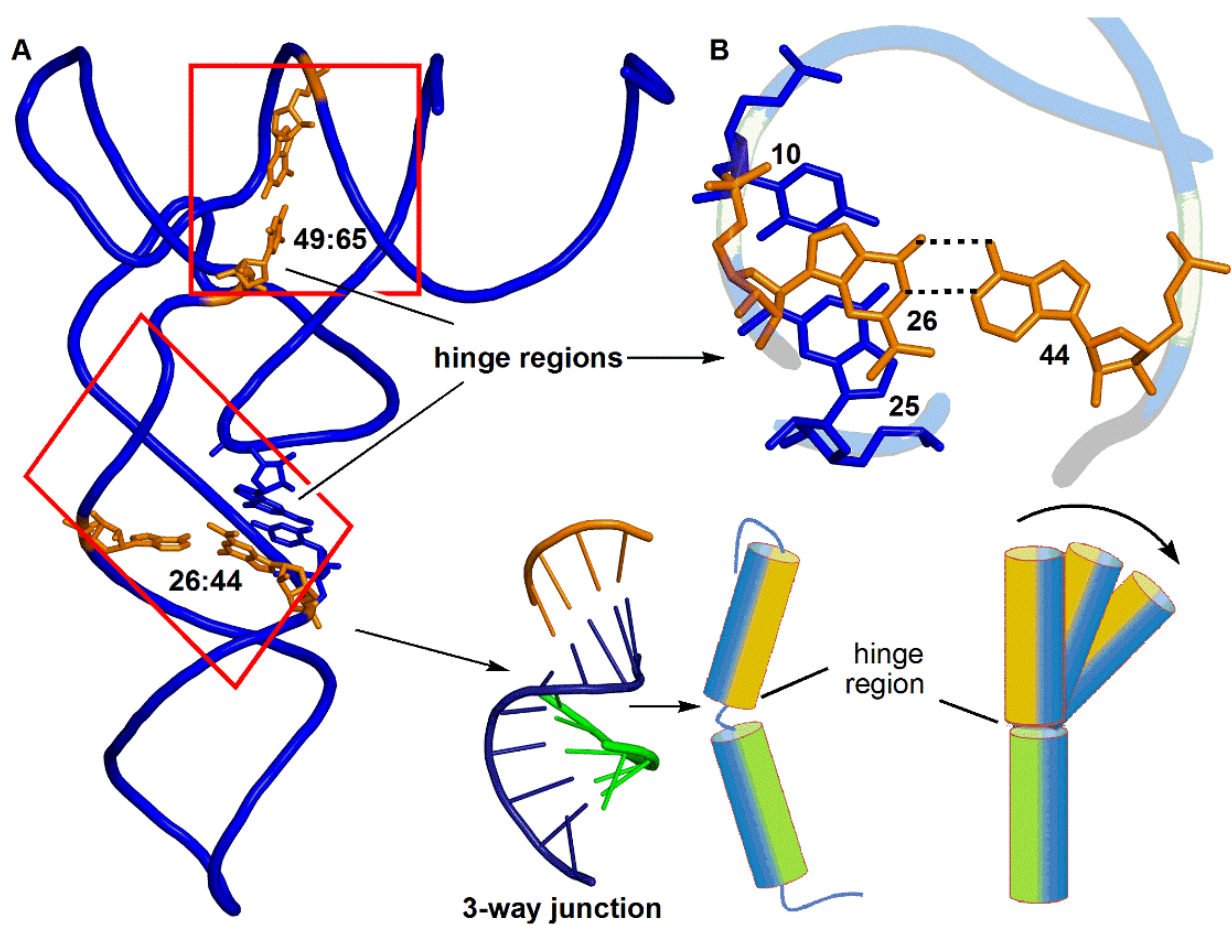

**FIGURE S11.** (A) Cartoon representation of tRNA showing the presence of modified base pairs ( $m^2G:C$ ,  $m^2_2G:A$  and  $m^5C:G$ ) at 10:25, 26:44 and 49:65 positions respectively in the two hinge regions (in red boxes). (B) Representation of the flexibility of the hinge region. (C) The 10:25 and 26:44 pairs zoomed for clarity.

|                        | Type of modification<br>(U:A W:H T)                                                                                               |                                    | Position of modification<br>(G:C W:WC)                                                                                |
|------------------------|-----------------------------------------------------------------------------------------------------------------------------------|------------------------------------|-----------------------------------------------------------------------------------------------------------------------|
| Thiouridine            | 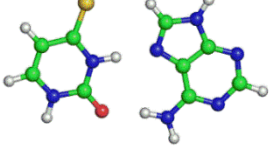<br>s <sup>4</sup> U:A (-16.3)                   | N2 - methyl Guanine                | <br>m <sup>2</sup> G:C (-29.5)      |
| Pseudouridine          | <br>Ψ:A (-16.2)                                  | N2 - methyl Guanine (+)            | <br>m <sup>2</sup> G:C (+), (-43.4) |
| Base methylation       | <br>m <sup>5</sup> U:A (-16.0)                   | N7 - methyl Guanine                | <br>m <sup>7</sup> G:C (-38.5)      |
| Base methylation       | <br>m <sup>5</sup> U:m <sup>1</sup> A (-23.3)   | C5 - methyl Cytosine               | <br>m <sup>5</sup> C:G (-30.0)     |
| Base/Sugar methylation | <br>m <sup>5</sup> Um:m <sup>1</sup> A (-22.1) | 2' - O - methyl Guanine            | <br>Gm:C (-30.0)                  |
| Sugar methylation      | <br>Um:A (-15.4)                               | 2' - O - methyl Guanine & Cytosine | <br>Gm:Cm (-28.9)                 |

**FIGURE S12.** Schematic representation of some modified base pairs illustrating effect of type (e.g. U:A W:HT) and position (e.g. G:C W:WC) of modification on the stability of the base pair. Interaction energy is represented in parenthesis (in kcal/mol).

**TABLE S1.** List of various RNA types searched in the dataset containing 207 crystal structures

| RNA Types                   | PDB Accession IDs                                                                                                                                                                                                                                                                                                                                                                                                                                                                                                            |
|-----------------------------|------------------------------------------------------------------------------------------------------------------------------------------------------------------------------------------------------------------------------------------------------------------------------------------------------------------------------------------------------------------------------------------------------------------------------------------------------------------------------------------------------------------------------|
| tRNA                        | 1asy, 1asz, 1b23, 1c0a, 1efw, 1ehz, 1evv, 1f7u, 1f7v, 1fir, 1gsg, 1h3e, 1h4q, 1h4s, 1i9v, 1il2, 1n32, 1n33, 1ob2, 1ob5, 1qf6, 1ser, 1tn1, 1tn2, 1tra, 1ttt, 1vtq, 1yfg, 2czj, 2dlc, 2fmt, 2j00, 2j02, 2tra, 2wdg, 2wdh, 2xqd, 2y0u, 2y0w, 2y0y, 2y10, 2y12, 2y14, 2y16, 2y18, 3b0u, 3bt7, 3cw5, 3cw6, 3kfu, 3kiq, 3kis, 3t1h, 3t1y, 3tra, 4byb, 4byd, 4dr5, 4dr6, 4gcw, 4jv5, 4jya, 4jyz, 4k0l, 4qcm, 4qco, 4qcq, 4qcs, 4qcu, 4qcw, 4qcy, 4qd0, 4qjt, 4rb5, 4rb7, 4rb9, 4rbb, 4rbd, 4rbf, 4rbh, 4rbj, 4tna, 4tra, 5ccx, 6tna |
| 16S rRNA                    | 1n32, 1n33, 2j00, 2j02, 2wdg, 2wdh, 2xqd, 2y0u, 2y0w, 2y0y, 2y10, 2y12, 2y14, 2y16, 2y18, 3t1h, 3t1y, 4byb, 4byd, 4dr2, 4dr3, 4dr5, 4dr6, 4duy, 4dv6, 4dv7, 4ji0, 4ji1, 4ji3, 4ji7, 4jv5, 4jya, 4k0l, 4lf4, 4lf6, 4lf7, 4lf8, 4lf9, 4lfb, 4qcm, 4qco, 4qcq, 4qcs, 4qcu, 4qcw, 4qcy, 4qd0, 4qjt, 4rb5, 4rb7, 4rb9, 4rbb, 4rbd, 4rbf, 4rbh, 4rbj, 4x62, 4x64, 4x65, 4x66, 5br8                                                                                                                                                 |
| 23S rRNA                    | 1jbs, 1s72, 1vq4, 1vq5, 1vq6, 1vq7, 1vq8, 1vq9, 1vqk, 1vql, 1vqm, 1vqn, 1vqo, 1vqp, 1yhq, 1yi2, 1yij, 1yit, 1yj9, 1yjn, 1yju, 2otj, 2otl, 2qa4, 2qex, 3cc2, 3cc4, 3cc7, 3cce, 3ccj, 3ccl, 3ccm, 3ccq, 3ccr, 3ccs, 3ccu, 3ccv, 3cd6, 3cma, 3cme, 3dw4, 3dw5, 3g4s, 3g6e, 3g71, 3i55, 3i56, 3kiq, 3kis, 4hub, 4y27, 5d99                                                                                                                                                                                                       |
| mRNA                        | 1n32, 1n33, 2czj, 2j00, 2j02, 2wdg, 2wdh, 2xqd, 2y0u, 2y0w, 2y0y, 2y10, 2y12, 2y14, 2y16, 2y18, 3t1h, 3t1y, 4dr5, 4dr6, 4jv5, 4jya, 4k0l, 4qcm, 4qco, 4qcq, 4qcs, 4qcu, 4qcw, 4qcy, 4qd0, 4qjt, 4rb5, 4rb7, 4rb9, 4rbb, 4rbd, 4rbf, 4rbh, 4rbj                                                                                                                                                                                                                                                                               |
| Small RNA–protein complexes | 1eqq, 1h2t, 1D, 1n1h, 1xmm, 2v0j, 3b0u, 3d45, 3g1h, 3mj0, 3o6e, 3o7v, 3t3n, 3t3o, 4gim, 4jnp, 4o8r, 5in3                                                                                                                                                                                                                                                                                                                                                                                                                     |
| Ribozyme                    | 1m5k, 2d2k, 2goz, 2oer, 2oue, 3b5a, 3b5s, 3bbi, 3bbm, 3cr1, 3i2q, 3l3c, 3zd3, 3zd4, 3zd5, 3zp8, 5dun                                                                                                                                                                                                                                                                                                                                                                                                                         |
| RNA fragments               | 1i7j, 2dqg, 310d, 4pcj, 4rbz, 4rc0, 4wcp, 4wcq, 4wcr, 4wcs                                                                                                                                                                                                                                                                                                                                                                                                                                                                   |
| snRNA                       | 3cgp, 3cgq, 3cgr, 3cgs, 3l3c                                                                                                                                                                                                                                                                                                                                                                                                                                                                                                 |
| Group I Introns             | 1t42, 1u6b, 1zzn                                                                                                                                                                                                                                                                                                                                                                                                                                                                                                             |
| tmRNA                       | 2czj                                                                                                                                                                                                                                                                                                                                                                                                                                                                                                                         |
| HIV genomic RNA             | 3dvv                                                                                                                                                                                                                                                                                                                                                                                                                                                                                                                         |



**TABLE S2.** Distribution of crystal structures within the dataset as a function of the type of RNA.

| Structure category | Structures with at least one modified base | Structures with at least one modified base pair | Structures with only unpaired modified bases |
|--------------------|--------------------------------------------|-------------------------------------------------|----------------------------------------------|
| tRNA               | 50                                         | 49                                              | 1                                            |
| 16S rRNA           | 32                                         | 22                                              | 10                                           |
| 23S rRNA           | 48                                         | 46                                              | 2                                            |
| RBP                | 32                                         | 8                                               | 24                                           |
| Ribosomes          | 21                                         | 2                                               | 19                                           |
| ribozyme           | 16                                         | 6                                               | 10                                           |
| Others             | 8                                          | 2                                               | 6                                            |
| Total              | 207                                        | 135                                             | 72                                           |

**TABLE S3.** List of PDBs with at least one modified base pair, distributed with respect to RNA types.

| RNA Types       | Occurrence | PDB Accession IDs                                                                                                                                                                                                                                                                                    |
|-----------------|------------|------------------------------------------------------------------------------------------------------------------------------------------------------------------------------------------------------------------------------------------------------------------------------------------------------|
| tRNA            | 49         | 1asy, 1asz, 1b23, 1c0a, 1efw, 1ehz, 1evv, 1f7u, 1f7v, 1fir, 1h3e, 1h4q, 1h4s, 1i9v, 1il2, 1n33, 1ob2, 1ob5, 1qf6, 1ser, 1tn1, 1tn2, 1tra, 1ttt, 1vtq, 1yfg, 2dlc, 2fmt, 2j00, 2j02, 2tra, 2wdh, 2xqd, 2y0u, 2y0w, 2y0y, 2y10, 2y12, 2y14, 2y16, 2y18, 3cw5, 3cw6, 3kfu, 3tra, 4jyz, 4tna, 4tra, 6tna |
| 16S rRNA        | 22         | 4dr2, 4dr3, 4dr5, 4dr6, 4duy, 4dv6, 4dv7, 4ji0, 4ji1, 4ji3, 4ji7, 4lf4, 4lf6, 4lf7, 4lf8, 4lf9, 4lfb, 4x62, 4x64, 4x65, 4x66, 5br8                                                                                                                                                                   |
| 23S rRNA        | 47         | 1jbs, 1s72, 1vq4, 1vq5, 1vq6, 1vq8, 1vq9, 1vqk, 1vql, 1vqm, 1vqn, 1vqo, 1vqp, 1yhq, 1yi2, 1yij, 1yit, 1yj9, 1yjn, 1yiw, 2otj, 2otl, 2qa4, 2qex, 3cc2, 3cc4, 3cc7, 3cce, 3ccj, 3ccl, 3ccm, 3ccq, 3ccr, 3ccs, 3ccu, 3ccv, 3cd6, 3cma, 3cme, 3dw4, 3dw5, 3g4s, 3g6e, 3g71, 3i55, 3i56, 5d99             |
| Ribozyme        | 7          | 1m5k, 2oue, 3b5a, 3b5s, 3bbi, 3cr1, 3l3c                                                                                                                                                                                                                                                             |
| snRNA           | 3          | 3cgq, 3cgr, 3cgs                                                                                                                                                                                                                                                                                     |
| Group I Intron  | 3          | 1t42, 1u6b, 1zzn                                                                                                                                                                                                                                                                                     |
| tRNA-mRNA       | 2          | 4jv5, 4jya                                                                                                                                                                                                                                                                                           |
| HIV genomic RNA | 1          | 3dvv                                                                                                                                                                                                                                                                                                 |
| tmRNA           | 1          | 2czj                                                                                                                                                                                                                                                                                                 |

**Table S4.** List of unpaired modified bases in the crystal structure (207 RNA crystal structures)

| Modified Bases                | Occur. Freq | No. of PDBs | Base Position  | Occur. Freq | No. of PDBs | PDB Accession Codes                                                                                                                                                                                                                                                                                                                                         |
|-------------------------------|-------------|-------------|----------------|-------------|-------------|-------------------------------------------------------------------------------------------------------------------------------------------------------------------------------------------------------------------------------------------------------------------------------------------------------------------------------------------------------------|
| m <sup>1</sup> A              | 53          | 48          | 1MA:8          | 5           | 4           | 4wcp, 4wcq,4wcr,4wcs                                                                                                                                                                                                                                                                                                                                        |
|                               |             |             | 1MA:31         | 4           | 4           | 4wcp, 4wcq,4wcr,4wcs                                                                                                                                                                                                                                                                                                                                        |
|                               |             |             | 1MA:58         | 1           | 1           | 5ccx                                                                                                                                                                                                                                                                                                                                                        |
|                               |             |             | 1MA:628        | 43          | 43          | 1s72, 1vq4, 1vq5, 1vq6, 1vq8, 1vq9, 1vqk, 1vql, 1vqm, 1vqn, 1vqo, 1vqp, 1yhq, 1yi2, 1yij, 1yit, 1yj9, 1yjn, 1yiw, 2otj, 2otl, 2qex, 3cc2, 3cc4, 3cc7, 3cce, 3ccj, 3ccl, 3ccm, 3ccq, 3ccr, 3ccs, 3ccu, 3ccv, 3cd6, 3cma, 3cme, 3g4s, 3g6e, 3g71, 3i55, 3i56, 4hub,                                                                                           |
| m <sup>6</sup> <sub>2</sub> A | 0           | –           | –              | –           | –           |                                                                                                                                                                                                                                                                                                                                                             |
| Am                            | 12          | 10          | Am             | 12          | 10          | 2d2k, 3bbm, 3i2q, 3kiq, 3kis, 3l3c, 4byb, 4byd, 4rbz, 4rc0,                                                                                                                                                                                                                                                                                                 |
| m <sup>2</sup> G              | 1           | 1           | 2MG:10         | 1           | 1           | 1ttt                                                                                                                                                                                                                                                                                                                                                        |
| m <sup>2</sup> <sub>2</sub> G | 25          | 25          | M2G:966        | 25          | 25          | 1f7u, 1f7v, 1ttt, 4dr2, 4dr3, 4dr5, 4dr6, 4duy, 4dv6, 4dv7, 4ji0, 4ji1, 4ji3, 4ji7, 4lf4, 4lf6, 4lf7, 4lf8, 4lf9, 4lfb, 4x62, 4x64, 4x65, 4x66, 5br8,                                                                                                                                                                                                       |
| m <sup>7</sup> G              | 14          | 11          | 7MG:1152, 651  | 3           | 2           | 1h2t, 3d45                                                                                                                                                                                                                                                                                                                                                  |
|                               |             |             | 7MG:1153       | 2           | 1           | 1h2u                                                                                                                                                                                                                                                                                                                                                        |
|                               |             |             | 7MG:46         | 6           | 6           | 2xqd, 2y0y, 2y12, 4qco, 4qcs, 4rbj,                                                                                                                                                                                                                                                                                                                         |
|                               |             |             | G7M:1424       | 1           | 1           | 1n1h                                                                                                                                                                                                                                                                                                                                                        |
|                               |             |             | G7M:503, 1502, | 2           | 1           | 1xmm                                                                                                                                                                                                                                                                                                                                                        |
| Gm                            | 23          | 18          | OMG:34         | 15          | 11          | 1ehz, 1evv, 1ob2, 1ob5, 1tn1, 1tn2, 1tra, 1ttt, 4tna, 4tra, 6tna,                                                                                                                                                                                                                                                                                           |
|                               |             |             | OMG:21         | 2           | 2           | 3kiq, 3kis                                                                                                                                                                                                                                                                                                                                                  |
|                               |             |             | OMG:2661       | 1           | 1           | 4y27                                                                                                                                                                                                                                                                                                                                                        |
|                               |             |             | OMG:903, 904   | 2           | 1           | 3t3o                                                                                                                                                                                                                                                                                                                                                        |
|                               |             |             | OMG:918        | 1           | 1           | 4jyz                                                                                                                                                                                                                                                                                                                                                        |
|                               |             |             | OMG:905        | 1           | 1           | 3t3n                                                                                                                                                                                                                                                                                                                                                        |
| m <sup>5</sup> C              | 61          | 39          | 5MC:32         | 16          | 16          | 4qcm, 4qco, 4qcq, 4qcs, 4qcu, 4qcw, 4qcy, 4qd0, 4rb5, 4rb7, 4rb9, 4rbb, 4rbd, 4rbf, 4rbh, 4rbj,                                                                                                                                                                                                                                                             |
|                               |             |             | 5MC:501        | 1           | 1           | 4jnp                                                                                                                                                                                                                                                                                                                                                        |
|                               |             |             | 5MC:967        | 22          | 22          | 4dr2, 4dr3, 4dr5, 4dr6, 4duy, 4dv6, 4dv7, 4ji0, 4ji1, 4ji3, 4ji7, 4lf4, 4lf6, 4lf7, 4lf8, 4lf9, 4lfb, 4x62, 4x64, 4x65, 4x66, 5br8,                                                                                                                                                                                                                         |
|                               |             |             | 5MC:1400       | 22          | 22          | 4dr2, 4dr3, 4dr5, 4dr6, 4duy, 4dv6, 4dv7, 4ji0, 4ji1, 4ji3, 4ji7, 4lf4, 4lf6, 4lf7, 4lf8, 4lf9, 4lfb, 4x62, 4x64, 4x65, 4x66, 5br8,                                                                                                                                                                                                                         |
| Cm                            | 35          | 29          | OMC:6          | 6           | 6           | 2goz, 2oeu, 3zd3, 3zd4, 3zd5, 3zp8,                                                                                                                                                                                                                                                                                                                         |
|                               |             |             | OMC:32         | 26          | 21          | 1ehz, 1evv, 1ob2, 1ob5, 1tn1, 1tn2, 1tra, 1ttt, 2fmt, 2xqd, 2y0u, 2y0w, 2y0y, 2y10, 2y12, 2y14, 2y16, 2y18, 4tna, 4tra, 6tna,                                                                                                                                                                                                                               |
|                               |             |             | OMC:901        | 1           | 1           | 3t3o                                                                                                                                                                                                                                                                                                                                                        |
|                               |             |             | OMC:903, 904   | 2           | 1           | 3t3n                                                                                                                                                                                                                                                                                                                                                        |
| Ψ                             | 231         | 182         | PSU:55         | 93          | 59          | 1asy, 1asz, 1b23, 1c0a, 1efw, 1ehz, 1evv, 1f7u, 1f7v, 1fir, 1h3e, 1h4q, 1h4s, 1il2, 1ob2, 1ob5, 1qf6, 1ser, 1tn1, 1tn2, 1tra, 1ttt, 2czj, 2dlc, 2fmt, 2xqd, 2y0u, 2y0w, 2y0y, 2y10, 2y12, 2y14, 2y16, 2y18, 3cw5, 3cw6, 3kfu, 4jyz, 4qcm, 4qco, 4qcq, 4qcs, 4qcu, 4qcw, 4qcy, 4qd0, 4qjt, 4rb5, 4rb7, 4rb9, 4rbb, 4rbd, 4rbf, 4rbh, 4rbj, 4tna, 4tra, 6tna, |
|                               |             |             | PSU:2621       | 44          | 44          | 1s72, 1vq4, 1vq5, 1vq6, 1vq8, 1vq9, 1vqk, 1vql, 1vqm, 1vqn, 1vqo, 1vqp, 1yhq, 1yi2, 1yij, 1yit, 1yj9, 1yjn, 1yiw, 2otj, 2otl, 2qa4, 2qex, 3cc2, 3cc4, 3cc7, 3cce, 3ccj, 3ccl, 3ccm, 3ccq, 3ccr, 3ccs, 3ccu, 3ccv, 3cd6, 3cma, 3cme, 3g4s, 3g6e, 3g71, 3i55, 3i56, 4hub                                                                                      |
|                               |             |             | PSU:1541       | 21          | 21          | 4dr2, 4dr3, 4dr5, 4dr6, 4duy, 4dv6, 4dv7, 4ji0, 4ji1, 4ji3, 4ji7, 4lf4, 4lf7, 4lf8, 4lf9, 4lfb, 4x62, 4x64, 4x65, 4x66, 5br8,                                                                                                                                                                                                                               |
|                               |             |             | PSU:1540       | 19          | 19          | 4dr2, 4dr3, 4dr5, 4dr6, 4duy, 4dv6, 4dv7, 4ji0, 4ji1, 4ji3, 4ji7, 4lf4, 4lf9, 4lfb, 4x62, 4x64, 4x65, 4x66, 5br8,                                                                                                                                                                                                                                           |

|                  |     |    |                        |    |    |                                                                                                                                                                                                                                                                         |
|------------------|-----|----|------------------------|----|----|-------------------------------------------------------------------------------------------------------------------------------------------------------------------------------------------------------------------------------------------------------------------------|
|                  |     |    | PSU:32, 1932           | 32 | 18 | 1asy, 1asz, 1b23, 1il2, 1vtq, 2tra, 3tra, 4qcm, 4qco, 4qcq, 4qcs, 4qjt, 4rb5, 4rb7, 4rb9, 4rbb, 4rbh, 4rbj,                                                                                                                                                             |
|                  |     |    | PSU:39                 | 11 | 11 | 1ehz, 1ob2, 2dlc, 3t1h, 3t1y, 4qco, 4qcs, 4x62, 4x64, 4x65, 4x66,                                                                                                                                                                                                       |
|                  |     |    | PSU:54                 | 3  | 3  | 1vtq, 2tra, 3tra                                                                                                                                                                                                                                                        |
|                  |     |    | PSU:38                 | 3  | 2  | 4dr6, 4jyz                                                                                                                                                                                                                                                              |
|                  |     |    | PSU:35                 | 2  | 2  | 1h3e, 2dlc                                                                                                                                                                                                                                                              |
|                  |     |    | PSU:1                  | 1  | 1  | 4jya                                                                                                                                                                                                                                                                    |
|                  |     |    | PSU:400                | 1  | 1  | 4gim                                                                                                                                                                                                                                                                    |
|                  |     |    | PSU:5                  | 1  | 1  | 4pcj                                                                                                                                                                                                                                                                    |
| s <sup>4</sup> U | 1   | 1  | 4SU:8                  | 1  | 1  | 4qd0                                                                                                                                                                                                                                                                    |
| m <sup>5</sup> U | 15  | 10 | 5MU:54                 | 11 | 9  | 2czj, 2wdg, 2xqd, 2y0y, 2y12, 2y14, 2y16, 3bt7, 4rb9,                                                                                                                                                                                                                   |
|                  |     |    | 5MU:801, 802, 803, 900 | 4  | 1  | 1eqq                                                                                                                                                                                                                                                                    |
| D                | 101 | 44 | H2U:16                 | 28 | 27 | 1asy, 1c0a, 1efw, 1ehz, 1evv, 1f7u, 1f7v, 1fir, 1qf6, 1tn1, 1tn2, 1tra, 1vtq, 1yfg, 2tra, 2y0u, 2y0w, 2y0y, 2y10, 2y12, 2y14, 2y16, 2y18, 3tra, 4tna, 4tra, 6tna,                                                                                                       |
|                  |     |    | H2U:17                 | 25 | 21 | 1ehz, 1evv, 1ob2, 1ob5, 1qf6, 1tn1, 1tn2, 1tra, 1ttt, 2xqd, 2y0u, 2y0w, 2y0y, 2y10, 2y12, 2y14, 2y16, 2y18, 4tna, 4tra, 6tna,                                                                                                                                           |
|                  |     |    | H2U:20                 | 28 | 20 | 1b23, 1c0a, 1efw, 1fir, 1qf6, 2fmt, 2xqd, 2y0u, 2y0w, 2y0y, 2y10, 2y12, 2y14, 2y16, 2y18, 3b0u, 3cw5, 3cw6, 3kfu, 4jyz,                                                                                                                                                 |
|                  |     |    | H2U:19                 | 11 | 8  | 1asy, 1asz, 1f7u, 1f7v, 1il2, 1vtq, 2tra, 3tra,                                                                                                                                                                                                                         |
|                  |     |    | H2U:47                 | 4  | 4  | 1f7u, 1f7v, 1fir, 1yfg                                                                                                                                                                                                                                                  |
|                  |     |    | H2U:21                 | 1  | 1  | 1b23                                                                                                                                                                                                                                                                    |
|                  |     |    | H2U:229                | 1  | 1  | 3g1h                                                                                                                                                                                                                                                                    |
|                  |     |    | H2U:301                | 1  | 1  | 4o8r                                                                                                                                                                                                                                                                    |
|                  |     |    | H2U:402                | 1  | 1  | 5in3                                                                                                                                                                                                                                                                    |
| H2U:1453         | 1   | 1  | 2v0j                   |    |    |                                                                                                                                                                                                                                                                         |
| Um               | 59  | 56 | OMU:2587               | 44 | 44 | 1s72, 1vq4, 1vq5, 1vq6, 1vq8, 1vq9, 1vqk, 1vql, 1vqm, 1vqn, 1vqo, 1vqp, 1yhq, 1yi2, 1yij, 1yit, 1yj9, 1yjn, 1yiw, 2otj, 2otl, 2qa4, 2qex, 3cc2, 3cc4, 3cc7, 3cce, 3ccj, 3ccl, 3ccm, 3ccq, 3ccr, 3ccs, 3ccu, 3ccv, 3cd6, 3cma, 3cme, 3g4s, 3g6e, 3g71, 3i55, 3i56, 4hub, |
|                  |     |    | OMU:19                 | 4  | 4  | 3kiq, 3kis, 4byb, 4byd                                                                                                                                                                                                                                                  |
|                  |     |    | OMU:14                 | 2  | 2  | 3o6e, 3o7v                                                                                                                                                                                                                                                              |
|                  |     |    | OMU:902                | 2  | 2  | 3t3n, 3t3o                                                                                                                                                                                                                                                              |
|                  |     |    | OMU:73, 74             | 2  | 1  | 4gcw                                                                                                                                                                                                                                                                    |
|                  |     |    | OMU:901, 906           | 2  | 1  | 3t3n                                                                                                                                                                                                                                                                    |
|                  |     |    | OMU:9                  | 1  | 1  | 3mj0                                                                                                                                                                                                                                                                    |
|                  |     |    | OMU:932                | 1  | 1  | 4jyz                                                                                                                                                                                                                                                                    |
| OMU:5            | 1   | 1  | 5dun                   |    |    |                                                                                                                                                                                                                                                                         |

**TABLE S5.** List of modified base pairs involving W:WC and W:WT pairing geometry.

| S.No | Base Pair                            | Position                                   | PDB Accession IDS                                                                                                                                       |
|------|--------------------------------------|--------------------------------------------|---------------------------------------------------------------------------------------------------------------------------------------------------------|
| W:WC |                                      |                                            |                                                                                                                                                         |
|      |                                      | m <sup>5</sup> C1404:G1497 (22)            | 4dr2, 4dr3, 4dr5, 4dr6, 4duy, ,4dv6, 4dv7, 4ji0, 4ji1, 4ji3, 4ji7, 4lf4, 4lf6, 4lf7, 4lf8, 4lf9, 4lfb, 4x62, 4x64, 4x65, 4x66, 5br8                     |
|      |                                      | m <sup>5</sup> C1407:G1494 (22)            | 4dr2, 4dr3, 4dr5, 4dr6, 4duy, 4dv6, 4dv7, 4ji0, 4ji1, 4ji3, 4ji7, 4lf4, 4lf6, 4lf7, 4lf8, 4lf9, 4lfb, 4x62, 4x64, 4x65, 4x66, 5br8                      |
|      |                                      | m <sup>5</sup> C40:G30 (15)                | 1ehz, 1evv, 1ob2, 1ob5, 1tn1, 1tn2, 1tra, 1ttt, 4tna, 4tra, 6tna                                                                                        |
|      |                                      | m <sup>5</sup> C48:G64 (3)                 | 1ttt, 1vtq, 2tra                                                                                                                                        |
|      |                                      | m <sup>5</sup> C49:G65 (25)                | 1asy, 1asz, 1ehz, 1evv, 1fir, 1f7u, 1f7v, 1il2, 1ob2, 1ob5, 1tn1, 1tn2, 1tra, 1ttt, 1yfg, 4tna, 4tra, 6tna                                              |
|      |                                      | m <sup>2</sup> G10:C25 (15)                | 1ehz , 1evv , 1fir , 1f7u, 1f7v, 1ob2 , 1tn1 , 1tn2 , 1tra , 1ttt , 1yfg , 4tna , 4tra , 6tna                                                           |
|      |                                      | m <sup>2</sup> G1207:C1051 (22)            | 4dr2 , 4dr3 , 4dr5 , 4dr6 , 4duy , 4dv6 , 4dv7 , 4ji0 , 4ji1 , 4ji3 , 4ji7 , 4lf4 , 4lf6 , 4lf7 , 4lf8 , 4lf9 , 4lfb , 4x62 , 4x64 , 4x65 , 4x66 , 5br8 |
| 3    | m <sup>2</sup> G:U                   | m <sup>2</sup> G6:U67                      | 1fir                                                                                                                                                    |
| 4    | m <sup>2</sup> <sub>2</sub> G:A (16) | m <sup>2</sup> <sub>2</sub> G Ψ26:A44 (16) | 1ehz , 1evv , 1ob2 , 1ob5 , 1tn1 , 1tn2 , 1tra , 1ttt , 1yfg , 2dlc , 4tna , 4tra , 6tna                                                                |
| 5    | m <sup>7</sup> G:A (22)              | m <sup>7</sup> G527:C522                   | 4dr2 , 4dr3 , 4dr5 , 4dr6 , 4duy , 4dv6 , 4dv7 , 4ji0 , 4ji1 , 4ji3 , 4ji7 , 4lf4 , 4lf6 , 4lf7 , 4lf8 , 4lf9 , 4lfb , 4x62 , 4x64 , 4x65 , 4x66 , 5br8 |
| 6    | m <sup>5</sup> U:G (3)               | m <sup>5</sup> U1:G10                      | 1t42 , 1u6b , 1zzn,                                                                                                                                     |
|      |                                      | Ψ39:A31 (14)                               | 1b23 , 1evv , 1fir , 1ob5 , 1tn1 , 1tn2 , 1tra , 1ttt , 4tna , 4tra , 6tna                                                                              |
|      |                                      | Ψ6:A21 (2)                                 | 3cgp, 3cgq                                                                                                                                              |
|      |                                      | Ψ7:A19 (1)                                 | 3cgr                                                                                                                                                    |
|      |                                      | Ψ4:A36 (2)                                 | 4jv5, 4jya                                                                                                                                              |

|      |                       |                        |                                                                                             |
|------|-----------------------|------------------------|---------------------------------------------------------------------------------------------|
|      |                       | Ψ27:A43 (3)            | 1fir, 1f7u, 1f7v                                                                            |
|      |                       | Ψ1:A72 (2)             | 1f7u, 1f7v                                                                                  |
|      |                       | Ψ13:G22 (5)            | 1asy, 1asz, 1vtq , 2tra , 3tra                                                              |
|      |                       | Ψ65:G49 (3)            | 1c0a, 1efw                                                                                  |
|      |                       | Ψ6:G20 (1)             | 3cgs                                                                                        |
|      |                       | Ψ30–G40(1)             | 1n33                                                                                        |
| 9    | Gm:C (12)             | Gm2588:C75 (12)        | 1vq4 , 1vq5 , 1vq6 , 1vqk , 1vql , 1vqm , 1vqn ,<br>1vqo , 1vqp , 3cd6 , 3cma , 3cme , 3i55 |
| 10   | Gm:A (1)              | Gm2588:A76             | 3cme                                                                                        |
| 11   | Am:Um (2)             | Am26:Um4               | 1jbs                                                                                        |
|      |                       | Um2650:A2670           | 3dw4, 5d99                                                                                  |
|      |                       | Um3:A21                | 3dvv                                                                                        |
| W:WT |                       |                        |                                                                                             |
| 1    | D:U (12)              | D16:U59                | 1asy , 1asz , 1il2 , 1ob2 , 1ob5 , 1ttt                                                     |
| 2    | m <sup>5</sup> C:G(3) | m <sup>5</sup> C48:G15 | 1fir, 1yfg, 2dlc                                                                            |

**TABLE S6.** List of modified base pairs involving W:HT and W:HC pairing geometry.

| S.No | Base Pair                              | Position                               | PDB Accession IDS                                                                                                                                    |
|------|----------------------------------------|----------------------------------------|------------------------------------------------------------------------------------------------------------------------------------------------------|
| W:HT |                                        |                                        |                                                                                                                                                      |
| 1    | m <sup>7</sup> G:G (27)                | m <sup>7</sup> G46:G22                 | 1c0a, 1efw, 1ehz, 1evv, 1fir, 1ob2, 1ob5, 1qf6, 1tn1, 1tn2, 1tra, 1ttt, 1yfg, 2y0u, 2y0w, 2y10, 2y14, 2y16, 2y18, 4tna, 4tra, 6tna                   |
| 2    | m <sup>5</sup> U:A (34)                | m <sup>5</sup> U54:A58                 | 1asy, 1asz, 1b23, 1c0a, 1efw, 1i9v, 1il2, 1qf6, 1ser, 1vtq, 2czj, 2fmt, 2j00, 2j02, 2tra, 2wdh, 2y0u, 2y0w, 2y10, 2y18, 3cw5, 3cw6, 3kfu, 3tra, 4jyz |
| 3    | m <sup>5</sup> U:G (2)                 | m <sup>5</sup> U54:G58                 | 1h4q, 1h4s                                                                                                                                           |
| 3    | m <sup>1</sup> A:m <sup>5</sup> U (18) | m <sup>1</sup> A58:m <sup>5</sup> U54  | 1ehz, 1evv, 1f7u, 1f7v, 1h3e, 1ob5, 1tn1, 1tn2, 1tra, 1ttt, 2dlc, 4tna, 4tra, 6tna                                                                   |
|      | m <sup>1</sup> A:U (1)                 | m <sup>1</sup> A58:U54                 | 1ob2                                                                                                                                                 |
|      | m <sup>1</sup> A:A (1)                 | m <sup>1</sup> A58:A54                 | 1yfg                                                                                                                                                 |
| 4    | s <sup>4</sup> U:A (12)                | s <sup>4</sup> U8:A14                  | 1efw, 2y10, 2y18, 1b23, 1c0a, 2fmt, 2y0u, 2y0w, 2y0y, 2y12, 2y14, 2y16, 3cw5, 3cw6                                                                   |
| 5    | m <sup>5</sup> Um:m <sup>1</sup> A (1) | m <sup>5</sup> Um54:m <sup>1</sup> A58 | 1fir                                                                                                                                                 |
| 6    | Um:A (1)                               | Um2656:A2665                           | 3dw5                                                                                                                                                 |
| 7    | Ψ:A (22)                               | Ψ516:A533                              | 4dr2, 4dr3, 4dr5, 4dr6, 4duy, 4dv6, 4dv7, 4ji0, 4ji1, 4ji3, 4ji7, 4lf4, 4lf6, 4lf7, 4lf8, 4lf9, 4lfb, 4x62, 4x64, 4x65, 4x66, 5br8                   |
| W:HC |                                        |                                        |                                                                                                                                                      |
| 1    | Ψ:A                                    | Ψ39:A31                                | 1ttt                                                                                                                                                 |

**TABLE S7.** List of modified base pairs involving S:WC, S:WT, W:ST, H:SC, S:HT, S:SC and S:ST pairing geometry.

| S.No | Base Pair                           | Position                              | PDB Accession IDs                                                                                                                                                                                               |
|------|-------------------------------------|---------------------------------------|-----------------------------------------------------------------------------------------------------------------------------------------------------------------------------------------------------------------|
| S:WC |                                     |                                       |                                                                                                                                                                                                                 |
| 1    | Ψ:C (22)                            | Ψ516:C519                             | 4dr2, 4dr3, 4dr5, 4dr6, 4duy, 4dv6, 4dv7, 4ji0, 4ji1, 4ji3, 4ji7, 4lf4, 4lf6, 4lf7, 4lf8, 4lf9, 4lfb, 4x62, 4x64, 4x65, 4x66, 5br8                                                                              |
| S:WT |                                     |                                       |                                                                                                                                                                                                                 |
| 1    | m <sup>7</sup> G:A (10)             | m <sup>7</sup> G527:A535              | 4dr2, 4dr5, 4dv6, 4dv7, 4ji1, 4ji3, 4ji7, 4lf6, 4lf7, 4lf8                                                                                                                                                      |
| 2    | s <sup>4</sup> U:A (7)              | s4U8:A                                | 1c0a, 2y0y, 2y12, 2y14, 2y16, 3cw5, 3cw6                                                                                                                                                                        |
| W:ST |                                     |                                       |                                                                                                                                                                                                                 |
| 1    | D:G (1)                             | D20:G15                               | 1ser                                                                                                                                                                                                            |
| 2    | m <sup>2</sup> <sub>6</sub> A:G (1) | m <sup>2</sup> <sub>6</sub> A76:G2618 | 1vq6                                                                                                                                                                                                            |
| 3    | Am:G (1)                            | Am0:G57                               | 3l3c                                                                                                                                                                                                            |
| H:SC |                                     |                                       |                                                                                                                                                                                                                 |
| 1    | Um:G (1)                            | Um2656:G2655                          | 3dw5                                                                                                                                                                                                            |
| 2    | D:G (1)                             | D620:G619                             | 1c0a                                                                                                                                                                                                            |
| S:HT |                                     |                                       |                                                                                                                                                                                                                 |
| 1    | Am:A (7)                            | Am5:A9                                | 1m5k , 2oue , 3b5a , 3b5s , 3bbi , 3cr1                                                                                                                                                                         |
| S:SC |                                     |                                       |                                                                                                                                                                                                                 |
| 1    | Gm:G (30)                           | Gm2588:G2617                          | 1s72 , 1vq8 , 1vq9 , 1yhq , 1yi2 , 1yij , 1yit , 1yj9 , 1yjn , 1yjw , 2otj , 2otl , 2qa4 , 2qex , 3cc2 , 3cc4 , 3cc7 , 3cce , 3ccj , 3ccl , 3ccm , 3ccq , 3ccr , 3ccs , 3ccu , 3ccv , 3g4s , 3g6e , 3g71 , 3i56 |
| 2    | s <sup>4</sup> U:A (1)              | s <sup>4</sup> U8:A46                 | 1b23                                                                                                                                                                                                            |
| S:ST |                                     |                                       |                                                                                                                                                                                                                 |
| 1    | m <sup>2</sup> <sub>6</sub> A:G (3) | m <sup>2</sup> <sub>6</sub> A76:G2618 | 1vq4, 1vq5, 3i55                                                                                                                                                                                                |
| 2    | Am:G (2)                            | Am0:G57                               | 3l3c                                                                                                                                                                                                            |
| 3    | m <sup>7</sup> G:A (1)              | m7G527:A535                           | 4ji0                                                                                                                                                                                                            |
| 4    | D:U (1)                             | D16:U60                               | 2xqd                                                                                                                                                                                                            |



**TABLE S8.** Categorization of modified base pairs with respect to their occurrence in various RNA types.

| RNA Type | Base pair position | Modified Base Pair                      | Occurrence                                                | Context                                                |
|----------|--------------------|-----------------------------------------|-----------------------------------------------------------|--------------------------------------------------------|
| tRNA     | 54–58              | A:m <sup>1</sup> A H:WT                 | 01                                                        | tRNA 58:54; Intra loop interaction in TΨC loop of tRNA |
|          |                    | m <sup>5</sup> U:m <sup>1</sup> A W:HT  | 18                                                        |                                                        |
|          |                    | m <sup>5</sup> Um:m <sup>1</sup> A W:HT | 01                                                        |                                                        |
|          |                    | m <sup>5</sup> U:A W:HT                 | 34                                                        |                                                        |
|          |                    | m <sup>5</sup> U:A W:HT                 | 34                                                        |                                                        |
|          |                    | m <sup>5</sup> U:G W:HT                 | 02                                                        |                                                        |
|          | 10:25              | m <sup>2</sup> G:U W:WC                 | 03                                                        | closing base pair(CB) of D–stem                        |
|          | 6:67               | m <sup>2</sup> G:U W:WC                 | 01                                                        | Next to CB of amino acceptor arm                       |
|          | 26:44              | m <sup>2</sup> G:A W:WC                 | 16                                                        | closing base pair of anticodon stem–loop               |
|          | 22:46              | m <sup>7</sup> G:G W:HT                 | 27                                                        | D–loop–Variable loop interaction                       |
|          | 48:15              | m <sup>5</sup> C:G W:WT                 | 04                                                        | D–loop–Variable loop interaction                       |
|          | 8:14               | s <sup>4</sup> U:A W:HT                 | 15                                                        | junction loop–D–loop interaction                       |
|          | 8:21               | s <sup>4</sup> U:A W:ST                 | 07                                                        | junction loop–D–loop interaction                       |
|          | 8:46               | s <sup>4</sup> U:A S:SC                 | 01                                                        | junction loop–Variable arm interaction                 |
|          | 31:39              | Ψ:A W:WC                                | 15                                                        | tRNA 31:39; Anti codon stem                            |
|          | 1:72               |                                         | 2                                                         | CB of amino acceptor arm                               |
|          | 13:22              | Ψ:G W:WC                                | 3                                                         | tRNA 13:22; CB of D–loop                               |
|          | 65:49              |                                         | 3                                                         | tRNA 65:49; CB of TΨC loop                             |
|          | 40:30              |                                         | 1                                                         | tRNA 40:30; Anti codon stem                            |
|          | 20:15              | D:G W:ST                                | 01                                                        | Intraloop [D–loop] interaction; base platform          |
| 20:19    | D:G H:SC           | 01                                      | tRNA 20:19; Intraloop [D–loop] interaction; base platform |                                                        |
| 16:59    | D:U W:WT           | 12                                      | tRNA 16:59; Interloop interaction [D and TΨC loop]        |                                                        |
| 16:60    | D:U S:ST           | 01                                      | tRNA 16:60; Interloop interaction [D and TΨC loop]        |                                                        |
| 16S rRNA | 527:522            | m <sup>7</sup> G:C W:WC                 | 22                                                        | next to CB; H18 (5' Domain)                            |
|          | 527:535            | m <sup>7</sup> G:A S:ST                 | 01                                                        | H18 (5' Domain), A minor interaction                   |
|          | 527:535            | m <sup>7</sup> G:A S:WT                 | 10                                                        | H18 (5' Domain), A minor interaction                   |
|          | 516:533            | Ψ:A W:HT                                | 22                                                        | CB of H18 (5' Domain)                                  |
|          | 516:519            | Ψ:C S:WC                                | 22                                                        | H18 (5' Domain)                                        |
| 23S rRNA | 2588:2617          | Gm:G S:SC                               | 30                                                        | H92 (V Domain)                                         |
|          | 2650:2670          | Um:A W:WC                               | 04                                                        | 23S rRNA 2650:2670; H95 (VI Domain)                    |

|                        |                        |                                      |    |                                                     |
|------------------------|------------------------|--------------------------------------|----|-----------------------------------------------------|
|                        | 2656:2665              | Um:A W:HT                            | 01 | 23S rRNA 2656:2665; sarcin-ricin domain             |
|                        | 2655:2656              | Um:G H:SC                            | 01 | 23S rRNA; Sarcin-ricin domain                       |
|                        |                        | Cm:Gm W:WC                           |    | sarcin/ricin domain RNA                             |
| Both tRNA and 16S rRNA | 10:25 (tRNA)           | m <sup>2</sup> G:C W:WC              |    | closing base pair(CB) of D-stem                     |
|                        | 1207:1051 (16S rRNA)   |                                      |    | Next to CB of H34 (3' M domain).                    |
|                        | 49:65 (tRNA)           | m <sup>5</sup> C:G W:WC              |    |                                                     |
|                        | 40:30 (tRNA)           |                                      |    |                                                     |
|                        | 1407:1494 (16S rRNA)   |                                      |    | in helix 44 of 3m domain of 16S rRNA                |
|                        | 1404:1497 (16S rRNA)   |                                      |    | in helix 44 of 3m domain of 16S rRNA                |
| tRNA-rRNA complex      | tRNA (76):rRNA (G2618) | m <sup>6</sup> <sub>2</sub> A:G S:ST | 01 | 23S rRNA (2618):tRNA analogue (76); H91 (V Domain); |
|                        | tRNA (76):rRNA (G2588) | Gm:A W:WC                            | 01 | 23S rRNA H92 (V Domain):tRNA acceptor arm           |
|                        | tRNA (76):rRNA (2588)  | Gm:C W:WC                            | 12 | 23S rRNA-H92 (V Domain)                             |
| Ribozyme               | 0:57                   | Am:G S:ST                            | 02 | <i>Homo sapiens</i> glmS ribozyme                   |
| snRNA                  | 1:10                   | m <sup>5</sup> U:G W:WC              | 03 | Exon bound to U1 SNRNP                              |

**TABLE S9.** Structural context of modified base pairs in RNA crystal structures.

| Secondary structure element | Modified base pair                         | Category          | Occurrence frequency | Type of RNA          | Context                                    |
|-----------------------------|--------------------------------------------|-------------------|----------------------|----------------------|--------------------------------------------|
| Helix                       |                                            |                   |                      |                      |                                            |
| (i) within helix            | m <sup>2</sup> G1207:C1051 W:WC            | Base methylation  | 22                   | Tth 16S rRNA         | helix 34 of 3'M domain of 16S rRNA         |
|                             | m <sup>2</sup> G6:U67 W:WC                 | Base methylation  | 1                    | HIV primer tRNA      | Amino acid acceptor arm of tRNA            |
|                             | Ψ27:A43 W:WC                               | Pseudouridylation | 3                    | Eco tRNA             | Anticodon stem of tRNA                     |
|                             | m <sup>5</sup> C:40:G30 W:WC               | Base methylation  | 15                   | Sce tRNA             | Anticodon stem of tRNA                     |
|                             | Um2656:A2670 W:WC                          | Sugar methylation | 2                    | Eco 23S rRNA         | Helix 95 of domain VI of 23S rRNA          |
|                             | m <sup>5</sup> U1:G10 W:WC                 | Base methylation  | 4                    | Hsp Group I Intron   | P1 helix of Group I Intron                 |
|                             | Um3:A21 W:WC                               | Sugar methylation | 2                    | HIV-1                | HIV-1 Genomic RNA                          |
|                             | Ψ6:A21 W:WC                                | Pseudouridylation | 2                    | snRNA                | snRNA                                      |
|                             | Ψ27:A43 W:WC                               | Pseudouridylation | 2                    | HIV primer           | HIV transcription primer tRNA              |
|                             | Um4:Am26 W:WC                              | Sugar methylation | 2                    | Aspergillus 23S rRNA | Sarcin-ricin domain RNA analog             |
|                             | Am5:A9 S:HT                                | Sugar methylation | 7                    | Ribozyme             | Ribozyme                                   |
|                             | Ψ6:G20 W:WC                                | Pseudouridylation | 1                    | snRNA                | snRNA                                      |
|                             | Um2656:G2655 H:SC                          | Sugar methylation | 1                    | E.coli 23S rRNA      | Sarcin-ricin domain RNA analog             |
|                             | Gm24:Cm6 W:WC                              | Sugar methylation | 1                    | Aspergillus 23S rRNA | Sarcin-ricin domain RNA analog             |
|                             | Um2656:A2665 W:HT                          | Sugar methylation | 1                    | E.coli 23S rRNA      | Sarcin-ricin domain RNA analog             |
|                             | Ψ7:A19 W:WC                                | Pseudouridylation | 1                    | snRNA                | snRNA                                      |
| (ii) closing base pair      | Ψ13:G22 W:WC                               | Pseudouridylation | 5                    | Sce tRNA             | D-stem of tRNA                             |
|                             | m <sup>2</sup> G10:C25 W:WC                | Base methylation  | 19                   |                      | D-Stem of tRNA                             |
|                             | Ψ65:G49 W:WC                               | Pseudouridylation | 3                    | Eco tRNA             | TΨC stem of tRNA                           |
|                             | Ψ1:A72 W:WC                                | Pseudouridylation | 2                    | Eco tRNA             | Amino acid acceptor arm of tRNA            |
|                             | Ψ39:A31 W:WC                               | Pseudouridylation | 15                   | Sce tRNA             | Anticodon stem of tRNA                     |
|                             | G65:m <sup>5</sup> C49 W:WC                | Base methylation  | 25                   | Sce tRNA             | TΨC stem of tRNA                           |
|                             | m <sup>2</sup> G26:A44 W:WC                | Base methylation  | 16                   | Sce tRNA             | Anticodon stem of tRNA                     |
|                             | m <sup>7</sup> G527:G522 W:WC              | Base methylation  | 22                   | Tth 16S rRNA         | helix 18 of 5M domain of 16S rRNA          |
| (iii) Internal Bulges       | m <sup>5</sup> C1407:G1494 W:WC            | Base methylation  | 22                   | Tth 16S rRNA         | helix 44 of 3m domain of 16S rRNA          |
|                             | m <sup>5</sup> C1404:G1497 W:WC            | Base methylation  | 22                   | Tth 16S rRNA         | helix 44 of 3m domain of 16S rRNA          |
|                             | Um2650:A2670 W:WC                          | Sugar methylation | 2                    | Eco 23S rRNA         | Bulge in Helix 95 of domain VI of 23S rRNA |
| Intra loop Interactions     | m <sup>5</sup> U54:m <sup>1</sup> A58 W:HT | Base methylation  | 18                   | Sce tRNA             | TΨC loop of tRNA                           |
|                             | m <sup>5</sup> U54:A58 W:HT                | Base methylation  | 34                   | Eco tRNA, Tth tRNA   | TΨC loop of tRNA                           |

|                       |                                            |                   |    |                   |                                                           |
|-----------------------|--------------------------------------------|-------------------|----|-------------------|-----------------------------------------------------------|
|                       | m <sup>5</sup> U54:G58 W:HT                | Base methylation  | 2  | Tth tRNA          | TΨC loop of tRNA                                          |
|                       | m <sup>1</sup> A58:A54 H:WT                | Base methylation  | 1  | Sce tRNA          | TΨC loop of tRNA                                          |
|                       | m <sup>1</sup> A58:U54 H:WT                | Base methylation  | 1  | Sce tRNA          | TΨC loop of tRNA                                          |
|                       | D20:G19 H:SC                               | Reduction         | 2  | Eco tRNA          | D-loop tRNA                                               |
|                       | D20:G15 W:ST                               | Reduction         | 1  | Eco tRNA          | D-loop tRNA                                               |
|                       | Cm32:A38 W:W(+) <sub>2</sub> C             | Sugar methylation | 2  | Eco tRNA          | Anti-codon loop of tRNA                                   |
| Tertiary interactions |                                            |                   |    |                   |                                                           |
| Helix-single strand   | m <sup>6</sup> <sub>2</sub> A76:G2618 S:ST | Base methylation  | 4  | Hma 23S rRNA      | between H89–H91 domain V and anti-codon stem loop of tRNA |
| Loop-single strand    | Gm2588:C75 W:WC                            | Sugar methylation | 12 | Hma 23S rRNA      | between H89–H91 domain V and anti-codon stem loop of tRNA |
| Loop-single strand    | Gm2588:A76 W:WC                            | Sugar methylation | 1  | Hma 23S rRNA      | between H89–H91 domain V and anti-codon stem loop of tRNA |
| Loop-single strand    | Am0:G57 S:ST                               | Sugar methylation | 2  | Bacillus Ribozyme | glms ribozyme                                             |
| Loop-single strand    | Ψ4:A36 W:WC                                | Pseudouridylation | 2  | Tth tRNA–mRNA     | Anti-codon loop of tRNA and mRNA complex                  |
| Stem-junction         | m <sup>7</sup> G527:A535 S:WT              | Base methylation  | 10 | Tth 16S rRNA      | helix 18 of 5M domain of 16S rRNA                         |
| Stem-junction         | m <sup>7</sup> G527:A535 S:ST              | Base methylation  | 1  | Tth 16S rRNA      | helix 18 of 5M domain of 16S rRNA                         |
| Loop-stem             | Gm2588:G2617 S:SC                          | Sugar methylation | 30 | Hma 23S rRNA      | Stem between H89–H91 & H92 of domain V                    |
| Loop-stem             | Ψ516:A533W:HT                              | Pseudouridylation | 22 | Tth 16S rRNA      | helix 18 of 5M domain and 530 loop of 16S rRNA            |
| Loop-stem             | Ψ516:C519 S:WC                             | Pseudouridylation | 22 | Tth 16S rRNA      | helix 18 of 5M domain                                     |
| Junction-loop         | m <sup>7</sup> G46:G22 W:HT                | Base methylation  | 23 | Sce tRNA          | Anti-codon stem loop of tRNA                              |
| Junction-loop         | s <sup>4</sup> U8:A14 W:HT                 | Thiolation        | 15 | tRNA              | Acceptor–D stem junction and D-loop                       |
| Junction-loop         | s <sup>4</sup> U8:A21 S:WT                 | Thiolation        | 7  | tRNA              | Acceptor–D stem junction and D-loop                       |
| Junction-loop         | s <sup>4</sup> U8:A46 S:SC                 | Thiolation        | 1  | tRNA              | Acceptor–D stem junction and D-loop                       |
| loop-loop             | m <sup>5</sup> C48:G15 W:WT                | Base methylation  | 03 | tRNA              | D-loop and variable arm                                   |
| loop-loop             | D16:U59 W:WT                               | Reduction         | 12 | Sce tRNA          | D-loop and TΨC loop interaction                           |
| loop-loop             | D16:U60 S:ST                               | Reduction         | 1  | Tth tRNA          | D-loop and TΨC loop interaction                           |

**TABLE S10.** Modified base pairs ranked according to their occurrence in all the tRNA sequences.

| Base pair                                  | Rank <sup>a</sup> | Frequency | Occurrence in aminoacyl tRNAs                         | Other combinations observed                                                                                                                                                             |
|--------------------------------------------|-------------------|-----------|-------------------------------------------------------|-----------------------------------------------------------------------------------------------------------------------------------------------------------------------------------------|
| 54m <sup>5</sup> U:58m <sup>1</sup> A H:WT | 02                | 124       | L, F, S, R, Y, V, M, I, K                             | m <sup>5</sup> U:A(126); U:A(60); m <sup>1</sup> Ψ:A(49); U:m <sup>1</sup> A(30); A:m <sup>1</sup> A(22); Ψ:m <sup>1</sup> A(15); m <sup>5</sup> Um:m <sup>1</sup> A(10)                |
| 10m <sup>2</sup> G:25C W:WC                | 02                | 128       | L, K, F, Y, R, M, N, W, V, G, I, M <sup>Ini</sup>     | G:C(246); G:U(37); C:G(19); m <sup>2</sup> G:U(13); m <sup>2</sup> <sub>2</sub> G:U(12);                                                                                                |
| 26m <sup>2</sup> G:44A W:WC                | 01                | 90        | F, Y, I, A, R, M, M <sup>Ini</sup> , N, T, W          | A:G(62); G:A(49); A:A(38); m <sup>2</sup> <sub>2</sub> G:Um(33); A:C(25); G:U(22); A:U(20); m <sup>2</sup> G:A(19); m <sup>2</sup> G:U(19); U:A(18); U:C(17); G:C(15)                   |
| 22G:46m <sup>7</sup> G H:WT                | 01                | 168       | F, K, M <sup>Ini</sup> , M, I, Y, A, W, P, R, N, T, V | G:G(61); A:G(50);G:A(47); U:A(27); A:A(25); A:U(19); U:m <sup>7</sup> G(18); U:G(10)                                                                                                    |
| 49m <sup>5</sup> C:65G W:WC                | 02                | 88        | G, E, F, Q, V, A, R, P, D, H                          | G:C(177); A:U(67); C:G(57); G:U(54); U:A(10)                                                                                                                                            |
| 8s <sup>4</sup> U:14A W:HT                 | 02                | 53        | S, M <sup>Ini</sup> , P, Y                            | U:A(382); U:m <sup>1</sup> A(9), U:G(4)                                                                                                                                                 |
| 54m <sup>5</sup> U:58A W:HT                | 01                | 126       | L, S, G, F, I, R, E, P, Y, M, D, W, T, V, A, Q, K, H  | m <sup>1</sup> A:m <sup>5</sup> U(124); U:A(60); m <sup>1</sup> Ψ:A(49); U:m <sup>1</sup> A(30); A:m <sup>1</sup> A(22); Ψ:m <sup>1</sup> A(15); m <sup>5</sup> Um:m <sup>1</sup> A(10) |
| 31A:39Ψ W:WC                               | 01                | 148       | F, Y, L, C, K, Q                                      | C:G(130); G:C(122); U:A(22); A:U(14)                                                                                                                                                    |
| 49G:65Ψ W:WC                               | 07                | 09        | W, I, D, R, P                                         | G:C(177); m <sup>5</sup> C:G(88); A:U(67); C:G(57); G:U(54); U:A(10)                                                                                                                    |
| 13Ψ:22G W:WC                               | 04                | 36        | Q, E, D, H, G, F, N                                   | C:G(229); G:A(64); Ψ:U(45); A:A(15); U:G(14); A:m <sup>1</sup> A(12); U:A(10)                                                                                                           |
| 30G:40Ψ W:WC                               | 03                | 13        | R, A, Q, M <sup>Ini</sup> , P, S                      | G:C(359); C:G(83); U:G(5)                                                                                                                                                               |
| 16D:59U W:WT                               | 08                | 38        | Y, S, R, Y, V, I, Q, G, H                             | D:C(72); D:G(68); U:C(60); U:U(41); U:G(40); C:C(40); C:G(39);                                                                                                                          |

<sup>a</sup> represents the populated modified base pair combinations at a given base pair combination in the hierarchy.

**TABLE S11.** List of 36 unique modified base pairs identified in the dataset and used for quantum chemical calculations.

| Modified base pairs                     | Occur. Freq. | RNA type    | Position  | Organism               | PDB id |
|-----------------------------------------|--------------|-------------|-----------|------------------------|--------|
| m <sup>5</sup> C:G W:WC                 | 87           | tRNA        | 49:65     | <i>S. cerevisiae</i>   | 1EHZ   |
| m <sup>2</sup> G:C W:WC                 | 38           | tRNA        | 10:25     | <i>S. cerevisiae</i>   | 1EVV   |
| Ψ:A W:WC                                | 24           | tRNA        | 39:31     | <i>E. coli</i>         | 1B23   |
| m <sup>7</sup> G:C W:WC                 | 22           | 16S rRNA    | 527:522   | <i>T. thermophilus</i> | 4DR1   |
| m <sup>2</sup> G:A W:WC                 | 16           | tRNA        | 26:44     | <i>S. cerevisiae</i>   | 1YFG   |
| Gm:C W:WC                               | 12           | 23S rRNA    | 2588:75   | <i>H. marismortui</i>  | 1VQ0   |
| Ψ:G W:WC                                | 10           | tRNA        | 13:22     | <i>S. cerevisiae</i>   | 1ASY   |
| Um:A W:WC                               | 4            | 23S rRNA    | 2650:2670 | <i>E. coli</i>         | 3DW4   |
| m <sup>5</sup> U:G W:WC                 | 3            | snRNA       | 1:10      | <i>Azoarcus</i>        | 1U6B   |
| m <sup>2</sup> G: C W:W(+ )C            | 3            | tRNA        | 10:25     | <i>S. cerevisiae</i>   | 1Q5S   |
| m <sup>2</sup> G:U W:WC                 | 1            | tRNA primer | 6:67      | <i>Bos taurus</i>      | 1FIR   |
| Gm:A W:WC                               | 1            | 23S rRNA    | 2588:76   | <i>H. marismortui</i>  | 3CME   |
| Cm:Gm W:WC                              | 1            | 23S rRNA    | 29:1      | <i>Aspergillus sp.</i> | 1JBS   |
| m <sup>5</sup> U:A W:HT                 | 34           | tRNA        | 54:58     | <i>T. thermophilus</i> | 1SER   |
| m <sup>7</sup> G:G W:HT                 | 27           | tRNA        | 46:22     | <i>S. cerevisiae</i>   | 1YFG   |
| Ψ:A W:HT                                | 22           | tRNA        | 533:516   | <i>T. thermophilus</i> | 4DR1   |
| m <sup>1</sup> A: m <sup>5</sup> U H:WT | 18           | tRNA        | 54:58     | <i>S. cerevisiae</i>   | 1EHZ   |
| s <sup>4</sup> U:A W:HT                 | 15           | tRNA        | 8:14      | <i>E. coli</i>         | 1B23   |
| m <sup>5</sup> U:G W:HT                 | 2            | tRNA        | 54:58     | <i>T. thermophilus</i> | 1H4Q   |
| m <sup>1</sup> A:A H:WT                 | 1            | tRNA        | 54:58     | <i>S. cerevisiae</i>   | 1YFG   |
| m <sup>1</sup> A:m <sup>5</sup> Um H:WT | 1            | tRNA primer | 58:54     | <i>Bos taurus</i>      | 1FIR   |
| Um:A W:HT                               | 1            | 23S rRNA    | 2656:2665 | <i>E. coli</i>         | 3DW5   |
| D:U W:WT                                | 12           | tRNA        | 16:59     | <i>S. cerevisiae</i>   | 1IL2   |
| m <sup>5</sup> C:G W:WT                 | 3            | tRNA primer | 48:15     | <i>Bos taurus</i>      | 1FIR   |
| Ψ:C S:WC                                | 22           | 16S rRNA    | 519:516   | <i>T. thermophilus</i> | 4DR1   |
| m <sup>7</sup> G:A S:WT                 | 10           | 16S rRNA    | 527:535   | <i>T. thermophilus</i> | 4DR1   |
| s <sup>4</sup> U:A W:ST                 | 7            | tRNA        | 8:21      | <i>E. coli</i>         | 1C0A   |
| D:G W:ST                                | 1            | tRNA        | 20:15     | <i>T. thermophilus</i> | 1SER   |
| D:G H:SC                                | 1            | tRNA        | 20:19     | <i>E. coli</i>         | 1C0A   |
| Um:G H:SC                               | 1            | 23S rRNA    | 2656:2655 | <i>E. coli</i>         | 3DW6   |
| Gm:G S:SC                               | 30           | 23S rRNA    | 2588:2617 | <i>H. marismortui</i>  | 3CME   |
| s <sup>4</sup> U:A S:SC                 | 1            | tRNA        | 8:46      | <i>E. coli</i>         | 1B23   |
| m <sup>6</sup> <sub>2</sub> A:G S:ST    | 3            | 23S rRNA    | 2618:76   | <i>H. marismortui</i>  | 3I55   |
| Am:G S:ST                               | 2            | ribozyme    | 0:57      | <i>H. sapien</i>       | 3L3C   |
| m <sup>7</sup> G:A S:ST                 | 1            | 16S rRNA    | 527:522   | <i>T. thermophilus</i> | 2OW8   |
| D:U S:ST                                | 1            | tRNA        | 16:60     | <i>E. coli</i>         | 2XQD   |

**TABLE S12.** Average RMSD of all crystal occurrences, average RMSD of crystal structures with reference to optimized geometry and deviation between optimized geometries of modified and unmodified base pairs.

| Modified base pairs                      | Occurrence Frequency | Average RMSD (Å)      |                    |                     |                    |                        |
|------------------------------------------|----------------------|-----------------------|--------------------|---------------------|--------------------|------------------------|
|                                          |                      | All crystal structure | Standard deviation | w.r.t Fopt geometry | Standard deviation | Modified vs Unmodified |
| m <sup>5</sup> C:G W:WC                  | 87                   | 0.0                   | 0.0                | 0.0                 | 0.0                | 0.0                    |
| m <sup>2</sup> G:C W:WC                  | 38                   | 0.1                   | 0.0                | 0.1                 | 0.0                | 0.0                    |
| Ψ:A W:WC                                 | 24                   | 0.0                   | 0.0                | 0.0                 | 0.0                | 0.0                    |
| m <sup>7</sup> G:C W:WC                  | 22                   | 0.0                   | 0.0                | 0.1                 | 0.0                | 0.1                    |
| m <sup>2</sup> <sub>2</sub> G:A W:WC     | 16                   | 0.4                   | 0.2                | 0.7                 | 0.3                | 0.3                    |
| Gm:C W:WC                                | 12                   | 0.1                   | 0.0                | 0.3                 | 0.0                | 0.2                    |
| Ψ:G W:WC                                 | 10                   | 0.0                   | 0.0                | 0.0                 | 0.0                | 1.5                    |
| Um:A W:WC                                | 4                    | 0.2                   | 0.1                | 1.2                 | 0.1                | 0.5                    |
| m <sup>2</sup> G: C W:W(+ )C             | 3                    | 0.0                   | 0.0                | 0.0                 | 0.0                | 0.1                    |
| m <sup>5</sup> U:G W:WC                  | 3                    | 0.0                   | 0.0                | 0.0                 | 0.0                | 1.4                    |
| m <sup>2</sup> G:U W:WC                  | 1                    | –                     | –                  | 0.2                 | –                  | 0.1                    |
| Gm:A W:WC                                | 1                    | –                     | –                  | 0.3                 | –                  | 0.0                    |
| Cm:Gm W:WC                               | 1                    | –                     | –                  | 0.2                 | –                  | 0.0                    |
| m <sup>5</sup> U:A W:HT                  | 34                   | 0.0                   | 0.1                | 0.1                 | 0.1                | 0.0                    |
| m <sup>7</sup> G:G W:HT                  | 27                   | 0.0                   | 0.0                | 0.1                 | 0.0                | 0.2                    |
| Ψ:A W:HT                                 | 22                   | 0.0                   | 0.0                | 0.1                 | 0.0                | 0.1                    |
| m <sup>1</sup> A: m <sup>5</sup> U H:WT  | 18                   | 0.0                   | 0.0                | 0.0                 | 0.0                | 0.1                    |
| s <sup>4</sup> U:A W:HT                  | 15                   | 0.1                   | 0.0                | 0.1                 | 0.0                | 0.1                    |
| m <sup>5</sup> U:G W:HT                  | 2                    | 0.0                   | 0.0                | 0.0                 | 0.0                | 0.0                    |
| m <sup>1</sup> A:A H:WT                  | 1                    | –                     | –                  | 0.0                 | –                  | 0.3                    |
| m <sup>1</sup> A: m <sup>5</sup> Um H:WT | 1                    | –                     | –                  | 0.3                 | –                  | 0.1                    |
| Um:A W:HT                                | 1                    | –                     | –                  | 0.4                 | –                  | 0.0                    |
| D:U W:WT                                 | 12                   | 0.2                   | 0.1                | 0.3                 | 0.1                | 0.2                    |
| m <sup>5</sup> C:G W:WT                  | 3                    | 0.0                   | 0.0                | 0.1                 | 0.0                | 0.5                    |
| Ψ:C S:WC                                 | 22                   | 0.1                   | 0.0                | 0.1                 | 0.0                | 0.4                    |
| m <sup>7</sup> G:A S:WT                  | 10                   | 0.1                   | 0.0                | 0.2                 | 0.0                | 0.0                    |
| s <sup>4</sup> U:A W:ST                  | 7                    | 0.2                   | 0.1                | 0.3                 | 0.1                | 0.1                    |
| D:G W:ST                                 | 1                    | –                     | –                  | 0.2                 | –                  | 0.4                    |
| D:G H:SC                                 | 1                    | –                     | –                  | 0.3                 | –                  | 0.2                    |
| Um:G H:SC                                | 1                    | –                     | –                  | 0.3                 | –                  | 0.0                    |
| Gm:G S:SC                                | 30                   | 0.1                   | 0.1                | 0.2                 | 0.0                | 2.1                    |
| s <sup>4</sup> U:A S:SC                  | 1                    | –                     | –                  | 0.5                 | –                  | 0.6                    |
| m <sup>6</sup> <sub>2</sub> A:G S:ST     | 3                    | 0.0                   | 0.0                | 0.4                 | 0.0                | 1.7                    |
| Am:G S:ST                                | 2                    | 0.0                   | 0.0                | 0.3                 | 0.0                | 0.3                    |
| m <sup>7</sup> G:A S:ST                  | 1                    | –                     | –                  | 0.2                 | –                  | 0.5                    |
| D:U S:ST                                 | 1                    | –                     | –                  | 0.7                 | –                  | –                      |

**TABLE S13.** Average ( $E_{av}$ ) and standard deviation (SD) of E-values of all Crystal occurrences,  $E_{av}$  and SD of crystal occurrences with respect to optimized geometry,  $E_{av}$  between optimized geometries of modified and unmodified base pairs.

| Modified Base pair                        | Occu. Freq. | Crystal structures |       | optimized geometry | SD w.r.t opt | Unmod. opt. geometry | Mod – Unmod ( $E_{diff}$ ) |
|-------------------------------------------|-------------|--------------------|-------|--------------------|--------------|----------------------|----------------------------|
|                                           |             | Avg.               | Stdev |                    |              |                      |                            |
| m <sup>5</sup> C:G W:WC                   | 87          | 0.3                | 0.2   | 0.2                | 0.3          | 0.2                  | 0.0                        |
| m <sup>2</sup> G:C W:WC                   | 38          | 0.3                | 0.2   | 0.3                | 0.2          | 0.2                  | 0.1                        |
| Ψ:A W:WC                                  | 24          | 0.5                | 0.3   | 0.2                | 0.4          | 0.2                  | 0.0                        |
| m <sup>7</sup> G:C W:WC                   | 22          | 0.3                | 0.1   | 0.2                | 0.2          | 0.2                  | 0.0                        |
| m <sup>2</sup> <sub>2</sub> G:A W:WC      | 16          | 0.5                | 0.2   | 0.1                | 0.5          | 0.1                  | 0.0                        |
| Gm:C W:WC                                 | 12          | 0.3                | 0.2   | 0.2                | 0.2          | 0.2                  | 0.0                        |
| Ψ:G W:WC                                  | 10          | 0.3                | 0.3   | 0.6                | 0.4          | 0.2                  | 0.4                        |
| Um:A W:WC                                 | 4           | 0.2                | 0.1   | 0.2                | 0.1          | 0.2                  | 0.0                        |
| m <sup>2</sup> G: C W:W(+) <sub>2</sub> C | 3           | 1.0                | 0.0   | 0.4                | 0.6          | 0.2                  | 0.2                        |
| m <sup>5</sup> U:G W:WC                   | 3           | 0.3                | 0.1   | 0.1                | 0.3          | 0.2                  | -0.1                       |
| m <sup>2</sup> G:U W:WC                   | 1           | 0.1                | 0.0   | 0.1                | 0.0          | 0.2                  | -0.1                       |
| Gm:A W:WC                                 | 1           | 0.4                | 0.0   | 0.1                | 0.1          | 0.1                  | 0.0                        |
| Cm:Gm W:WC                                | 1           | 0.2                | 0.0   | 0.2                | 0.0          | 0.2                  | 0.0                        |
| m <sup>5</sup> U:A W:HT                   | 34          | 0.4                | 0.2   | 0.2                | 0.3          | 0.3                  | 0.0                        |
| m <sup>7</sup> G:G W:HT                   | 27          | 0.6                | 0.4   | 0.3                | 0.6          | 0.5                  | -0.3                       |
| Ψ:A W:HT                                  | 22          | 0.5                | 0.2   | 0.2                | 0.4          | 0.3                  | -0.1                       |
| m <sup>1</sup> A: m <sup>5</sup> U H:WT   | 18          | 0.5                | 0.2   | 0.3                | 0.3          | 0.3                  | 0.0                        |
| s <sup>4</sup> U:A W:HT                   | 15          | 0.4                | 0.3   | 0.2                | 0.4          | 0.3                  | 0.0                        |
| m <sup>5</sup> U:G W:HT                   | 2           | 1.0                | 0.0   | 0.4                | 0.7          | 0.4                  | 0.0                        |
| m <sup>1</sup> A:A H:WT                   | 1           | 0.2                | 0.0   | 0.3                | 0.0          | 0.1                  | 0.2                        |
| m <sup>1</sup> A: m <sup>5</sup> Um H:WT  | 1           | 0.9                | 0.0   | 0.3                | 0.3          | 0.3                  | 0.1                        |
| Um:A W:HT                                 | 1           | 0.5                | 0.0   | 0.3                | 0.0          | 0.3                  | 0.0                        |
| D:U W:WT                                  | 12          | 0.6                | 0.5   | 0.1                | 0.7          | 0.1                  | 0.0                        |
| m <sup>5</sup> C:G W:WT                   | 3           | 0.3                | 0.1   | 0.5                | 0.2          | 0.3                  | 0.2                        |
| Ψ:C S:WC                                  | 22          | 1.0                | 0.2   | 1.1                | 0.2          | 0.3                  | 0.8                        |
| m <sup>7</sup> G:A S:WT                   | 10          | 1.3                | 0.3   | 1.1                | 0.3          | 0.2                  | 0.9                        |
| s <sup>4</sup> U:A W:ST                   | 7           | 1.0                | 0.5   | 0.6                | 0.6          | 0.4                  | 0.2                        |
| D:G W:ST                                  | 1           | 0.4                | 0.0   | 0.3                | 0.0          | 0.3                  | 0.1                        |
| D:G H:SC                                  | 1           | 0.6                | 0.0   | 1.5                | 0.8          | 0.6                  | 0.9                        |
| Um:G H:SC                                 | 1           | 0.7                | 0.0   | 0.5                | 0.0          | 0.6                  | -0.1                       |
| Gm:G S:SC                                 | 30          | 1.2                | 0.2   | 1.1                | 0.2          | 0.6                  | 0.6                        |
| s <sup>4</sup> U:A S:SC                   | 1           | 1.2                | 0.0   | 0.9                | 0.1          | 0.3                  | 0.6                        |
| m <sup>6</sup> <sub>2</sub> A:G S:ST      | 3           | 1.0                | 0.5   | 1.1                | 0.4          | 1.1                  | 0.1                        |
| Am:G S:ST                                 | 1           | 0.7                | 0.0   | 1.2                | 0.3          | 1.1                  | 0.2                        |
| m <sup>7</sup> G:A S:ST                   | 1           | 1.2                | 0.0   | 1.2                | 0.0          | 1.1                  | 0.2                        |
| D:U S:ST                                  | 1           | 1.0                | 0.0   | 1.1                | 0.0          | -                    | -                          |



**TABLE S14.** Local intra base pair rotational parameters (Buckle ( $\kappa$ ), Open ( $\sigma$ ) and Propeller ( $\pi$ )) calculated for crystal, optimized and unmodified structures (values in deg( $^{\circ}$ ))

| Modified Base Pair                        | Frequency | Crystal structures |      |            |      |                 |      | Optimized structures |      |            |      |                 |      | Un modified structures |               |            |               |                 |               |
|-------------------------------------------|-----------|--------------------|------|------------|------|-----------------|------|----------------------|------|------------|------|-----------------|------|------------------------|---------------|------------|---------------|-----------------|---------------|
|                                           |           | Buckle (deg)       |      | Open (deg) |      | Propeller (deg) |      | Buckle (deg)         |      | Open (deg) |      | Propeller (deg) |      | Buckle (deg)           |               | Open (deg) |               | Propeller (deg) |               |
|                                           |           | Avg                | SD   | Avg        | SD   | Avg             | SD   | Opt. value           | SD   | Opt. value | SD   | Opt. value      | SD   | Opt. value             | $\Delta(M-U)$ | Opt. value | $\Delta(M-U)$ | Opt. value      | $\Delta(M-U)$ |
| m <sup>5</sup> C:G W:WC                   | 87        | 2.3                | 10.3 | -0.2       | 4.4  | -7.3            | 6.9  | 0.0                  | 10.5 | -2.9       | 5.1  | 0.1             | 10.1 | 0.0                    | 0.0           | -2.9       | -0.1          | -0.1            | 0.1           |
| m <sup>2</sup> G:C W:WC                   | 38        | -5.8               | 6.5  | 1.2        | 3.6  | -3.6            | 6.3  | 0.1                  | 8.7  | -3.7       | 6.0  | 0.1             | 7.2  | -1.0                   | 1.0           | -3.5       | -0.2          | 0.0             | 0.1           |
| $\Psi$ :A W:WC                            | 24        | 7.9                | 9.0  | -0.3       | 7.1  | -8.4            | 7.6  | -0.4                 | 12.1 | -3.8       | 7.8  | 0.0             | 11.2 | 0.1                    | -0.5          | 2.3        | -6.1          | 0.1             | 0.0           |
| m <sup>7</sup> G:C W:WC                   | 22        | 7.2                | 4.7  | 9.5        | 2.7  | 7.3             | 2.3  | 0.1                  | 8.5  | 1.8        | 8.2  | 0.0             | 7.6  | -1.0                   | 1.0           | -3.5       | 5.3           | 0.0             | 0.0           |
| m <sup>2</sup> <sub>2</sub> G:A W:WC      | 16        | 23.4               | 3.2  | -3.0       | 5.7  | -22.3           | 9.2  | 18.6                 | 5.8  | -3.6       | 5.6  | -22.4           | 8.9  | -0.6                   | 19.2          | -2.4       | -1.2          | -19.3           | -3.1          |
| Gm:C W:WC                                 | 12        | 8.0                | 4.2  | -4.2       | 1.2  | 0.5             | 4.6  | -2.0                 | 10.8 | -3.4       | 1.4  | 1.9             | 4.7  | -1.0                   | -1.1          | -3.5       | 0.1           | 0.0             | 1.9           |
| $\Psi$ :G W:WC                            | 10        | 4.1                | 6.7  | 1.8        | 6.7  | -6.9            | 4.7  | 0.7                  | 7.2  | 1.1        | 6.4  | 1.7             | 9.7  | -2.9                   | 3.6           | 1.1        | -0.1          | -0.6            | 2.3           |
| Um:A W:WC                                 | 4         | -10.1              | 21.4 | 3.4        | 2.3  | 7.0             | 37.5 | 0.6                  | 23.1 | 1.9        | 2.4  | 0.0             | 33.1 | 0.1                    | 0.6           | 2.3        | -0.5          | 0.1             | -0.1          |
| m <sup>2</sup> G: C W:W(+) <sub>2</sub> C | 3         | -15.3              | 0.0  | 12.2       | 0.0  | -3.6            | 0.0  | -0.1                 | 15.2 | -17.4      | 29.6 | -0.2            | 3.4  | -1.0                   | 0.8           | -3.5       | -13.9         | 0.0             | -0.2          |
| m <sup>5</sup> U:G W:WC                   | 3         | 0.0                | 1.6  | -13.4      | 3.9  | -7.5            | 1.4  | 3.3                  | 3.5  | 1.5        | 15.2 | 0.5             | 8.1  | -2.9                   | 6.1           | 1.1        | 0.4           | -0.7            | 1.2           |
| m <sup>2</sup> G:U W:WC                   | 1         | 1.7                | -    | 6.2        | -    | 1.6             | -    | 2.4                  | 0.5  | 1.0        | 3.7  | 0.3             | 0.9  | 2.9                    | -0.4          | 1.1        | -0.1          | -0.7            | 1.0           |
| Gm:A W:WC                                 | 1         | 16.6               | -    | 10.3       | -    | 15.0            | -    | 1.3                  | 10.9 | -2.4       | 9.0  | 20.2            | 3.7  | -0.6                   | 1.9           | -2.4       | 0.0           | -19.3           | 39.5          |
| Cm:Gm W:WC                                | 1         | 0.1                | -    | 0.6        | -    | 0.1             | -    | 1.0                  | 4.3  | -3.5       | 4.0  | 4.9             | 5.2  | 0.0                    | 1.0           | -3.5       | 0.0           | 0.0             | 4.9           |
| m <sup>5</sup> U:A W:HT                   | 34        | 9.3                | 7.8  | 3.4        | 8.0  | 4.7             | 6.0  | -0.1                 | 12.2 | 3.1        | 7.9  | 0.0             | 7.6  | 0.0                    | -0.1          | 3.4        | -0.3          | 0.0             | -0.1          |
| m <sup>7</sup> G:G W:HT                   | 27        | 7.4                | 7.1  | 0.6        | 5.4  | 3.0             | 9.1  | 0.3                  | 9.9  | 2.7        | 5.7  | 0.2             | 9.4  | -7.4                   | 7.7           | 10.4       | -7.7          | -3.5            | 3.6           |
| $\Psi$ :A W:HT                            | 22        | 18.7               | 4.2  | -0.5       | 3.6  | 4.8             | 3.4  | -0.1                 | 19.2 | -0.4       | 3.5  | -0.1            | 5.9  | 0.0                    | -0.1          | -3.4       | 3.1           | 0.0             | -0.1          |
| m <sup>1</sup> A: m <sup>5</sup> U H:WT   | 18        | 6.4                | 4.8  | 3.4        | 6.6  | 0.4             | 3.4  | 0.0                  | 7.9  | -2.3       | 8.6  | 0.0             | 3.3  | 0.0                    | 0.0           | -3.4       | 1.2           | 0.0             | 0.0           |
| s <sup>4</sup> U:A W:HT                   | 15        | 10.7               | 8.6  | 3.0        | 4.6  | 3.5             | 5.2  | 0.4                  | 13.3 | 2.8        | 4.5  | 1.0             | 5.6  | 0.0                    | 0.4           | -3.4       | 6.2           | 0.0             | 1.0           |
| m <sup>5</sup> U:G W:HT                   | 2         | 8.6                | 1.1  | 2.6        | 1.6  | 1.2             | 0.7  | -1.0                 | 9.7  | 22.9       | 20.3 | 1.5             | 0.6  | -0.8                   | -0.2          | 22.8       | 0.1           | 1.4             | 0.1           |
| m <sup>1</sup> A:A H:WT                   | 1         | -4.0               | -    | 0.5        | -    | 13.1            | -    | -1.7                 | 1.6  | -8.1       | 6.1  | 28.1            | 10.6 | 0.0                    | -1.8          | -0.6       | -7.5          | 1.6             | 26.5          |
| m <sup>1</sup> A: m <sup>5</sup> Um H:WT  | 1         | 6.4                | -    | 7.7        | -    | -2.0            | -    | 7.9                  | 1.1  | 0.3        | 5.2  | 2.4             | 3.1  | 0.0                    | 7.9           | -3.4       | 3.8           | 0.0             | 2.4           |
| Um:A W:HT                                 | 1         | -18.9              | -    | 2.5        | -    | -6.2            | -    | 3.8                  | 13.8 | 4.8        | 0.5  | 0.4             | 4.4  | 0.0                    | 3.7           | -3.4       | 8.2           | 0.0             | 0.4           |
| D:U W:WT                                  | 12        | -22.0              | 27.0 | -2.0       | 6.1  | 4.9             | 16.8 | 6.8                  | 38.8 | -0.6       | 6.0  | 23.4            | 24.5 | 0.0                    | 6.8           | 0.0        | -0.6          | 0.0             | 23.4          |
| m <sup>5</sup> C:G W:WT                   | 3         | -5.9               | 4.0  | 7.4        | 4.6  | -4.5            | 7.6  | -18.3                | 12.9 | -11.4      | 19.2 | -39.6           | 35.7 | 17.6                   | -35.9         | -11.6      | 0.2           | 39.1            | -78.7         |
| $\Psi$ :C S:WC                            | 22        | 33.8               | 4.3  | 16.4       | 3.7  | -21.9           | 3.1  | 38.8                 | 6.5  | 17.6       | 3.8  | -12.4           | 10.0 | 47.1                   | -8.3          | -32.9      | 50.5          | -19.4           | 7.0           |
| m <sup>7</sup> G:A S:WT                   | 10        | -35.1              | 2.3  | 41.2       | 3.1  | -31.0           | 2.0  | -53.2                | 18.2 | 38.7       | 3.8  | 18.9            | 49.8 | -5.1                   | -48.2         | 7.6        | 31.1          | 34.2            | -15.3         |
| s <sup>4</sup> U:A W:ST                   | 7         | 9.9                | 12.4 | 59.3       | 17.7 | -10.8           | 7.8  | 8.4                  | 11.6 | 44.0       | 22.4 | -13.9           | 7.9  | 22.0                   | -13.6         | -4.3       | 48.3          | 8.9             | -22.7         |
| D:G W:ST                                  | 1         | 29.6               | -    | -0.7       | -    | 39.8            | -    | 17.6                 | 8.5  | -11.2      | 7.4  | 59.2            | 13.7 | -32.2                  | 49.8          | -31.0      | 19.8          | 5.4             | 53.7          |
| D:G H:SC                                  | 1         | -17.5              | -    | 0.9        | -    | -7.6            | -    | -32.7                | 10.7 | 6.5        | 4.0  | -10.5           | 2.0  | -52.6                  | 20.0          | -2.1       | 8.6           | 1.9             | -12.3         |
| Um:G H:SC                                 | 1         | -3.2               | -    | -5.2       | -    | 3.5             | -    | -0.5                 | 1.9  | -2.0       | 2.3  | 27.9            | 17.2 | -52.6                  | 52.1          | -2.1       | 0.2           | 1.9             | 26.0          |
| Gm:G S:SC                                 | 30        | -11.6              | 2.2  | 8.7        | 1.7  | 11.2            | 2.1  | -59.7                | 48.1 | 22.8       | 14.1 | 4.9             | 6.7  | 5.3                    | -65.0         | -10.8      | 33.5          | -61.1           | 66.0          |
| s <sup>4</sup> U:A S:SC                   | 1         | 19.8               | -    | -29.1      | -    | -12.2           | -    | 45.4                 | 18.1 | -35.9      | 4.8  | -15.9           | 2.6  | 2.6                    | 42.8          | -38.5      | 2.6           | -43.3           | 27.4          |
| m <sup>6</sup> <sub>2</sub> A:G S:ST      | 3         | -37.9              | 1.5  | -21.3      | 1.2  | 11.1            | 1.2  | -67.0                | 25.2 | -14.8      | 5.7  | 11.9            | 1.1  | -5.1                   | -61.9         | 7.6        | -22.5         | 34.2            | -22.3         |
| Am:G S:ST                                 | 2         | -19.8              | 1.0  | 17.3       | 0.5  | -10.3           | 0.9  | -91.3                | 71.5 | -20.8      | 38.0 | 19.8            | 30.1 | -5.1                   | -86.3         | 7.6        | -28.4         | 34.2            | -14.4         |
| m <sup>7</sup> G:A S:ST                   | 1         | -40.8              | -    | -38.7      | -    | 2.7             | -    | -106.6               | 46.5 | -23.6      | 10.7 | 23.8            | 14.9 | -5.1                   | -101.5        | 7.6        | -31.2         | 34.2            | -10.4         |
| D:U S:ST                                  | 1         | 20.4               | -    | -3.9       | -    | -11.3           | -    | -41.9                | 44.1 | 27.8       | 22.5 | -7.6            | 2.6  | -                      | -41.9         | -          | 27.8          | -               | -7.6          |

**TABLE S15.** Local intra base pair translational parameters (Stagger (Sx), Shear (Sy) and Stretch (Sz)) calculated for crystal, optimized and unmodified structures (values in Å)

| Modified Base Pair                       | Frequency | Crystal structures |     |           |     |             |     | Optimized structures |     |           |     |             |     | Unmodified structures |        |           |        |             |        |
|------------------------------------------|-----------|--------------------|-----|-----------|-----|-------------|-----|----------------------|-----|-----------|-----|-------------|-----|-----------------------|--------|-----------|--------|-------------|--------|
|                                          |           | Stagger (Å)        |     | Shear (Å) |     | Stretch (Å) |     | Stagger (Å)          |     | Shear (Å) |     | Stretch (Å) |     | Stagger (Å)           |        | Shear (Å) |        | Stretch (Å) |        |
|                                          |           | Avg                | SD  | Avg       | SD  | Avg         | SD  | Opt.                 | SD  | Opt.      | SD  | Opt.        | SD  | Opt.                  | Δ(M-U) | Opt.      | Δ(M-U) | Opt.        | Δ(M-U) |
| m <sup>5</sup> C:G W:WC                  | 87        | -0.1               | 0.4 | -0.1      | 0.5 | 2.8         | 0.2 | 0.0                  | 0.4 | 2.4       | 2.5 | 2.9         | 4.3 | 0.0                   | 0.0    | 2.4       | 0.1    | 2.9         | 0.1    |
| m <sup>2</sup> G:C W:WC                  | 38        | -0.2               | 0.3 | -0.3      | 0.5 | 2.8         | 0.2 | 0.0                  | 0.3 | -0.1      | 0.5 | 2.9         | 0.2 | 0.0                   | 1.0    | -0.1      | 0.2    | 2.9         | 0.1    |
| Ψ:A W:WC                                 | 24        | -0.2               | 0.5 | -0.6      | 0.6 | 2.8         | 0.2 | 0.0                  | 0.5 | -0.1      | 0.8 | 2.8         | 0.2 | 0.0                   | 0.5    | 0.1       | 6.1    | 2.8         | 0.0    |
| m <sup>7</sup> G:C W:WC                  | 22        | -0.2               | 0.2 | -0.1      | 0.3 | 2.8         | 0.1 | 0.0                  | 0.3 | -0.2      | 0.3 | 2.9         | 0.1 | 0.0                   | 1.0    | -0.1      | 5.3    | 2.9         | 0.0    |
| m <sup>2</sup> <sub>2</sub> G:A W:WC     | 16        | -0.4               | 0.6 | -0.5      | 0.7 | 2.8         | 0.2 | -0.4                 | 0.6 | -0.1      | 0.8 | 3.0         | 0.2 | -0.2                  | 19.2   | 0.0       | 1.2    | 2.9         | 3.1    |
| Gm:C W:WC                                | 12        | 0.2                | 0.1 | 0.0       | 0.1 | 3.0         | 0.2 | 0.0                  | 0.2 | -0.1      | 0.2 | 2.9         | 0.2 | 0.0                   | 1.1    | -0.1      | 0.1    | 2.9         | 1.9    |
| Ψ:G W:WC                                 | 10        | 0.1                | 0.5 | 1.9       | 0.5 | 2.8         | 0.1 | 0.1                  | 0.4 | 2.4       | 0.6 | 2.8         | 0.1 | -0.1                  | 3.6    | 2.4       | 0.1    | 2.8         | 2.3    |
| Um:A W:WC                                | 4         | -0.2               | 0.4 | 0.0       | 0.3 | 2.7         | 0.2 | 0.0                  | 0.4 | -0.1      | 0.3 | 2.9         | 0.2 | 0.0                   | 0.6    | -0.1      | 0.5    | 2.9         | -0.1   |
| m <sup>2</sup> G: C W:W(+ )C             | 3         | -1.4               | 0.0 | -1.9      | 0.0 | 3.0         | 0.0 | 0.0                  | 1.2 | -2.2      | 0.3 | 2.9         | 0.1 | -0.6                  | 0.8    | -3.4      | 13.9   | 2.6         | -0.2   |
| m <sup>5</sup> U:G W:WC                  | 3         | 0.7                | 0.3 | -2.3      | 0.1 | 2.8         | 0.1 | 0.1                  | 0.6 | -2.4      | 0.1 | 2.8         | 0.1 | -0.1                  | 6.1    | 2.4       | 0.4    | 2.8         | 1.2    |
| m <sup>2</sup> G:U W:WC                  | 1         | 0.3                | -   | -1.9      | -   | 3.0         | -   | -0.1                 | 0.2 | -2.4      | 0.3 | 2.8         | 0.1 | -0.1                  | 0.4    | 2.4       | 0.1    | 2.8         | 1.0    |
| Gm:A W:WC                                | 1         | 0.2                | -   | -0.3      | -   | 2.5         | -   | -0.2                 | 0.3 | 0.0       | 0.2 | 2.9         | 0.3 | -0.2                  | 1.9    | 0.0       | 0.0    | 2.9         | 39.5   |
| Cm:Gm W:WC                               | 1         | -0.2               | -   | 0.2       | -   | 2.8         | -   | 0.1                  | 0.1 | 0.1       | 0.1 | 2.9         | 0.2 | 0.0                   | 1.0    | -0.1      | 0.0    | 2.9         | 4.9    |
| m <sup>5</sup> U:A W:HT                  | 34        | 0.2                | 0.5 | 0.4       | 0.5 | 2.8         | 0.2 | 0.0                  | 0.5 | 0.1       | 0.6 | 2.8         | 0.2 | 0.0                   | 0.1    | 0.1       | 0.3    | 2.8         | 0.1    |
| m <sup>7</sup> G:G W:HT                  | 27        | 0.4                | 0.6 | 0.3       | 0.5 | 2.9         | 0.3 | 0.0                  | 0.7 | 0.3       | 0.5 | 2.8         | 0.3 | 0.1                   | 7.7    | 0.2       | 7.7    | 2.9         | 3.6    |
| Ψ:A W:HT                                 | 22        | -0.3               | 0.3 | -0.1      | 0.2 | 2.9         | 0.1 | 0.0                  | 0.4 | -0.1      | 0.2 | 2.9         | 0.1 | 0.0                   | 0.1    | 0.1       | 3.1    | 2.8         | -0.1   |
| m <sup>1</sup> A: m <sup>5</sup> U H:WT  | 18        | 0.1                | 0.3 | 0.0       | 0.4 | 2.9         | 0.1 | 0.0                  | 0.3 | 0.2       | 0.4 | 2.9         | 0.1 | 0.0                   | 0.0    | 0.1       | 1.2    | 2.8         | 0.0    |
| s <sup>4</sup> U:A W:HT                  | 15        | 0.1                | 0.4 | 0.7       | 0.6 | 2.8         | 0.2 | 0.0                  | 0.4 | 0.1       | 0.9 | 2.9         | 0.2 | 0.0                   | 0.4    | 0.1       | 6.2    | 2.8         | 1.0    |
| m <sup>5</sup> U:G W:HT                  | 2         | -0.1               | 0.2 | 0.4       | 0.1 | 2.5         | 0.1 | 0.0                  | 0.1 | 0.0       | 0.4 | 3.0         | 0.5 | 0.0                   | 0.2    | 0.0       | 0.1    | 3.0         | 0.1    |
| m <sup>1</sup> A:A H:WT                  | 1         | -0.1               | -   | 2.8       | -   | 2.7         | -   | 0.2                  | 0.2 | 2.4       | 0.2 | 2.8         | 0.1 | 0.0                   | 1.8    | 2.6       | 7.5    | 3.0         | 26.5   |
| m <sup>1</sup> A: m <sup>5</sup> Um H:WT | 1         | -0.2               | -   | -0.7      | -   | 2.9         | -   | 0.0                  | 0.2 | 0.2       | 0.6 | 2.9         | 0.0 | 0.0                   | 7.9    | 0.1       | 3.8    | 2.8         | 2.4    |
| Um:A W:HT                                | 1         | -0.1               | -   | 0.0       | -   | 2.6         | -   | 0.0                  | 0.1 | 0.1       | 0.0 | 2.8         | 0.2 | 0.0                   | 3.7    | 0.1       | 8.2    | 2.8         | 0.4    |
| D:U W:WT                                 | 12        | 0.3                | 0.6 | -1.8      | 0.3 | 2.8         | 0.3 | -0.6                 | 1.0 | -2.6      | 0.8 | 2.9         | 0.3 | 0.0                   | 6.8    | -2.6      | 0.6    | 2.9         | 23.4   |
| m <sup>5</sup> C:G W:WT                  | 3         | 0.0                | 0.2 | -2.4      | 0.3 | 2.9         | 0.1 | -0.1                 | 0.2 | -2.5      | 0.2 | 3.0         | 0.1 | 0.1                   | 35.9   | -2.5      | 0.2    | 3.0         | 78.7   |
| Ψ:C S:WC                                 | 22        | -0.5               | 0.3 | 1.3       | 0.2 | 4.5         | 0.1 | -0.7                 | 0.3 | 0.4       | 0.9 | 4.4         | 0.1 | -1.2                  | 8.3    | -0.7      | 50.5   | 4.3         | 7.0    |
| m <sup>7</sup> G:A S:WT                  | 10        | -0.6               | 0.3 | -2.8      | 0.2 | 2.8         | 0.1 | 1.4                  | 2.0 | 2.0       | 4.8 | 2.7         | 0.2 | 0.9                   | 48.2   | 1.5       | 31.1   | 3.2         | 15.3   |
| s <sup>4</sup> U:A W:ST                  | 7         | 0.2                | 0.3 | -0.4      | 0.6 | 4.4         | 0.4 | 0.8                  | 0.6 | 0.7       | 1.2 | 4.1         | 0.5 | 0.8                   | 13.6   | -0.2      | 48.3   | 3.0         | 22.7   |
| D:G W:ST                                 | 1         | -0.1               | —   | -0.7      | -   | 3.1         | -   | -0.1                 | 0.0 | -0.4      | 0.2 | 3.0         | 0.1 | -0.1                  | 49.8   | -0.8      | 19.8   | 4.7         | 53.7   |
| D:G H:SC                                 | 1         | -0.7               | -   | 0.2       | -   | 3.1         | -   | 0.2                  | 0.6 | 0.9       | 0.5 | 3.3         | 0.1 | 0.0                   | 20.0   | 1.0       | 8.6    | 3.7         | 12.3   |
| Um:G H:SC                                | 1         | -0.2               | -   | 1.2       | -   | 3.3         | -   | 0.6                  | 0.5 | 0.4       | 0.5 | 3.4         | 0.1 | 0.0                   | 52.1   | 1.0       | 0.2    | 3.7         | 26.0   |
| Gm:G S:SC                                | 30        | 1.6                | 0.1 | 2.5       | 0.1 | 3.0         | 0.1 | 1.1                  | 0.6 | 1.6       | 0.8 | 3.1         | 0.1 | -0.1                  | -65.0  | 1.8       | 33.5   | 3.8         | 66.0   |
| s <sup>4</sup> U:A S:SC                  | 1         | -1.8               | -   | -1.2      | -   | 3.2         | -   | -0.9                 | 0.6 | -0.9      | 0.2 | 4.3         | 0.7 | -0.8                  | 42.8   | -0.6      | 2.6    | 4.2         | 27.4   |
| m <sup>6</sup> <sub>2</sub> A:G S:ST     | 3         | -0.7               | 0.1 | 1.3       | 0.2 | 2.7         | 0.4 | -0.4                 | 0.3 | 1.5       | 0.2 | 3.3         | 0.6 | 0.9                   | 61.9   | 1.5       | 22.5   | 3.2         | 22.3   |
| Am:G S:ST                                | 2         | -0.3               | 0.3 | 1.4       | 0.2 | 3.4         | 0.1 | 1.3                  | 1.5 | 1.4       | 0.2 | 3.0         | 0.4 | 0.9                   | 86.3   | 1.5       | -28.4  | 3.2         | 14.4   |
| m <sup>7</sup> G:A S:ST                  | 1         | -0.7               | -   | 2.3       | -   | 3.6         | -   | -1.5                 | 0.6 | 1.1       | 0.8 | 2.8         | 0.5 | 0.9                   | 101.5  | 1.5       | -31.2  | 3.2         | 10.4   |
| D:U S:ST                                 | 1         | -0.8               | -   | 3.7       | -   | 3.3         | -   | -0.2                 | 0.5 | 5.0       | 0.9 | 3.0         | 0.2 | -                     | 41.9   | -         | 27.8   | -           | 7.6    |

++ SD for single occurrence are not applicable in crystal structures.

**TABLE S16.** Interaction energies (kcal/mol) of modified and unmodified base pairs.

| Modified base pairs                       | Occurrence Frequency | Interaction Energy of Modified base pairs | Interaction Energy of Unmodified base pairs | Difference between Modified and Unmodified base pairs |
|-------------------------------------------|----------------------|-------------------------------------------|---------------------------------------------|-------------------------------------------------------|
| m <sup>5</sup> C:G W:WC                   | 87                   | -30.00                                    | -29.43                                      | -0.57                                                 |
| m <sup>2</sup> G:C W:WC                   | 38                   | -29.47                                    | -29.43                                      | -0.04                                                 |
| Ψ:A W:WC                                  | 24                   | -14.79                                    | -15.26                                      | 0.47                                                  |
| m <sup>7</sup> G:C W:WC                   | 22                   | -38.45                                    | -29.43                                      | -9.02                                                 |
| m <sup>2</sup> <sub>2</sub> G:A W:WC      | 16                   | -17.69                                    | -17.84                                      | 0.15                                                  |
| Gm:C W:WC                                 | 12                   | -29.99                                    | -29.20                                      | -0.79                                                 |
| Ψ:G W:WC                                  | 10                   | -18.22                                    | -16.80                                      | -1.42                                                 |
| Um:A W:WC                                 | 4                    | -15.78                                    | -15.40                                      | -0.38                                                 |
| m <sup>2</sup> G: C W:W(+) <sub>2</sub> C | 3                    | -43.37                                    | -39.97                                      | -3.40                                                 |
| m <sup>5</sup> U:G W:WC                   | 3                    | -17.18                                    | -16.81                                      | -0.37                                                 |
| m <sup>2</sup> G:U W:WC                   | 1                    | -16.90                                    | -16.81                                      | -0.09                                                 |
| Gm:A W:WC                                 | 1                    | -18.08                                    | -18.37                                      | 0.29                                                  |
| Cm:Gm W:WC                                | 1                    | -28.94                                    | -27.44                                      | -1.50                                                 |
| m <sup>5</sup> U:A W:HT                   | 34                   | -15.97                                    | -15.90                                      | -0.07                                                 |
| m <sup>7</sup> G:G W:HT                   | 27                   | -35.10                                    | -19.85                                      | -15.25                                                |
| Ψ:A W:HT                                  | 22                   | -16.18                                    | -15.90                                      | -0.28                                                 |
| m <sup>1</sup> A: m <sup>5</sup> U H:WT   | 18                   | -23.30                                    | -15.90                                      | -7.40                                                 |
| s <sup>4</sup> U:A W:HT                   | 15                   | -16.34                                    | -15.90                                      | -0.44                                                 |
| m <sup>5</sup> U:G W:HT                   | 2                    | -9.76                                     | -10.02                                      | 0.26                                                  |
| m <sup>1</sup> A:A H:WT                   | 1                    | -22.99                                    | -13.36                                      | -9.63                                                 |
| m <sup>1</sup> A: m <sup>5</sup> Um H:WT  | 1                    | -22.12                                    | -16.15                                      | -5.97                                                 |
| Um:A W:HT                                 | 1                    | -15.41                                    | -16.15                                      | 0.74                                                  |
| D:U W:WT                                  | 12                   | -11.94                                    | -11.82                                      | -0.12                                                 |
| m <sup>5</sup> C:G W:WT                   | 3                    | -14.11                                    | -13.72                                      | -0.39                                                 |
| Ψ:C S:WC                                  | 22                   | -13.79                                    | -20.09                                      | 6.30                                                  |
| m <sup>7</sup> G:A S:WT                   | 10                   | -22.50                                    | -16.51                                      | -5.99                                                 |
| s <sup>4</sup> U:A W:ST                   | 7                    | -12.58                                    | -12.37                                      | -0.21                                                 |
| D:G W:ST                                  | 1                    | -15.46                                    | -18.29                                      | 2.83                                                  |
| D:G H:SC                                  | 1                    | -12.88                                    | -12.40                                      | -0.48                                                 |
| Um:G H:SC                                 | 1                    | -14.58                                    | -12.40                                      | -2.18                                                 |
| Gm:G S:SC                                 | 30                   | -15.89                                    | -15.39                                      | -0.50                                                 |
| s <sup>4</sup> U:A S:SC                   | 1                    | -20.96                                    | -19.63                                      | -1.33                                                 |
| m <sup>6</sup> <sub>2</sub> A:G S:ST      | 3                    | -21.49                                    | -21.00                                      | -0.49                                                 |
| Am:G S:ST                                 | 2                    | -19.91                                    | -21.00                                      | 1.09                                                  |
| m <sup>7</sup> G:A S:ST                   | 1                    | -34.91                                    | -21.00                                      | -13.91                                                |
| D:U S:ST                                  | 1                    | -16.29                                    | -                                           | -                                                     |

**TABLE S17.** List of Triples and Quartets formed by modified base pairs along with crystal structure PDBs.

| Modified base                     | Modified base triple                                | Freq. | PDB accession no.                                                                                                                                                                                                                                                 | Base Pair I                         | Base Pair II                 | Quartet |
|-----------------------------------|-----------------------------------------------------|-------|-------------------------------------------------------------------------------------------------------------------------------------------------------------------------------------------------------------------------------------------------------------------|-------------------------------------|------------------------------|---------|
| Gm (56)                           | G2617_C2542_Gm2588_WWC–SSC                          | 43    | 1s72, 1vq4, 1vq5, 1vq6, 1vq8, 1vq9, 1vqk, 1vql, 1vqm, 1vqn, 1vqo, 1vqp, 1yhq, 1yi2, 1yij, 1yit, 1yj9, 1yjn, 1yjm, 2otj, 2otl, 2qa4, 2qex, 3cc2, 3cc4, 3cc7, 3cce, 3ccj, 3ccl, 3ccm, 3ccq, 3ccr, 3ccs, 3ccu, 3ccv, 3cd6, 3cma, 3cme, 3g4s, 3g6e, 3g71, 3i55, 3i56, | Gm2588:G2617 S:SC                   | –                            | –       |
|                                   | Gm2588_C75_G2617_WWC–SSC                            | 12    | 1vq4, 1vq6, 1vqk, 1vql, 1vqm, 1vqn, 1vqo, 3cd6, 3cma, 3i55, 1vq5, 1vqp,                                                                                                                                                                                           | Gm2588:G2617 S:SC                   | Gm2588:C75 WWC               | C2542   |
|                                   | Gm2588_A76_G2617_WWC–SSC                            | 1     | 3cme                                                                                                                                                                                                                                                              | Gm2588:G2617 SSC                    | Gm2588:A76 WWC               | –       |
| m <sup>7</sup> G (31)             | G22_C13_m <sup>7</sup> G46_WWC–HWT                  | 20    | 1c0a, 1ob2, 1ob5, 1yfg, 1ehz, 1evv, 1fir, 1tn1, 1tn2, 1tra, 1ttt, 2y0u, 2y0w, 2y10, 2y18, 4tna, 4tra, 6tna, 1efw, 1qf6,                                                                                                                                           | m <sup>7</sup> G46:G22 WHT          | –                            | –       |
|                                   | m <sup>7</sup> G 527_C522_A535_WWC–swT              | 11    | 4ji0, 4dr2, 4dr5, 4dv6, 4dv7, 4ji1, 4ji3, 4ji7, 4lf6, 4lf7, 4lf8,                                                                                                                                                                                                 | m <sup>7</sup> G527:C522 WWC        | m <sup>7</sup> G527:A535 SWT | –       |
| Ψ (28)                            | Ψ516_A533_C519_WHT–SWC                              | 22    | 4dr2, 4dr3, 4dr5, 4dr6, 4duy, 4dv6, 4dv7, 4ji0, 4ji1, 4ji3, 4ji7, 4lf4, 4lf6, 4lf7, 4lf8, 4lf9, 4lf8, 4x62, 4x64, 4x65, 4x66, 5br8,                                                                                                                               | Ψ516:A533 WHT                       | Ψ516_C519 SWC                | A520    |
|                                   | G22_Ψ13_A46_WWC–H+T                                 | 4     | 1il2, 1asy, 1asz, 1il2,                                                                                                                                                                                                                                           | Ψ13:G22 WWC                         | –                            | –       |
|                                   | Ψ4_A36_A1493_WWC_SSC                                | 2     | 4jv5, 4jya                                                                                                                                                                                                                                                        | Ψ4:A36 WWC                          | –                            | –       |
| s <sup>4</sup> U (13)             | s <sup>4</sup> U8_A14_A21_WHT–swT                   | 12    | 1c0a, 1efw, 2xqd, 2y0y, 2y12, 2y14, 2y16, 3cw5, 3cw6, 4jyz, 2y10, 2y18,                                                                                                                                                                                           | s <sup>4</sup> U8:A14 WHT           | s <sup>4</sup> U8_A21 SWT    |         |
|                                   | s <sup>4</sup> U8_A14_A46_WHT–ssC                   | 1     | 1b23                                                                                                                                                                                                                                                              | s <sup>4</sup> U8:A14 WHT           | s <sup>4</sup> U8_A46 SSC    |         |
| m <sup>5</sup> U (3)              | G10_m <sup>5</sup> U1_A58_WWC–ssC                   | 3     | 1t42, 1u6b, 1zzn,                                                                                                                                                                                                                                                 | m <sup>5</sup> U1:G10 WWC           | –                            | –       |
| D (2)                             | G15_C48_D20_WWT–SWT                                 | 1     | 1ser                                                                                                                                                                                                                                                              | D:G SWT                             | –                            | –       |
|                                   | G619_C656_D620_WWC–shC                              | 1     | 1c0a                                                                                                                                                                                                                                                              | D:G HSC                             | –                            | –       |
| m <sup>5</sup> C (2)              | G1497_m <sup>5</sup> C1404_A1518_WWC–swT            | 2     | 4lf7, 4lf8                                                                                                                                                                                                                                                        | m <sup>5</sup> C:G WWC              | –                            | –       |
| m <sup>6</sup> <sub>2</sub> A (1) | G2618_U2541_m <sup>6</sup> <sub>2</sub> A76_WWC–swT | 1     | 1vq6                                                                                                                                                                                                                                                              | m <sup>6</sup> <sub>2</sub> A:G WST | –                            | –       |
| Um (1)                            | Um2656_G2655_A2665_hsC–WHT                          | 1     | 3dw5                                                                                                                                                                                                                                                              | Um:G HSC                            | Um2656:A2665 WHT             | –       |

**TABLE S18.** Cartesian coordinates of the 36 modified base pairCartesian coordinates of the modified base pair m<sup>5</sup>C:G W:WC

Calculated energy (in Hartrees) = -976.876111

| ATOM | X         | Y         | Z         |
|------|-----------|-----------|-----------|
| N    | -0.044066 | -0.235488 | 0.035823  |
| C    | 0.049193  | -0.275313 | 1.437433  |
| O    | 1.163484  | -0.429038 | 1.949913  |
| N    | -1.109867 | -0.139816 | 2.133369  |
| C    | -2.282743 | 0.023000  | 1.509601  |
| N    | -3.372981 | 0.147837  | 2.273291  |
| C    | -2.396564 | 0.066394  | 0.060258  |
| C    | -1.228300 | -0.070300 | -0.619151 |
| C    | -3.721039 | 0.250079  | -0.627087 |
| N    | -0.875016 | -0.298189 | 9.007076  |
| C    | -2.230746 | -0.134498 | 9.250370  |
| N    | -2.935548 | -0.025101 | 8.156172  |
| C    | -2.004211 | -0.120493 | 7.134986  |
| C    | -2.161275 | -0.073125 | 5.713632  |
| O    | -3.202585 | 0.068950  | 5.054104  |
| N    | -0.923598 | -0.213889 | 5.057051  |
| C    | 0.298171  | -0.377128 | 5.667897  |
| N    | 1.369683  | -0.491076 | 4.856096  |
| N    | 0.456389  | -0.423272 | 6.984335  |
| C    | -0.711970 | -0.291263 | 7.644711  |
| H    | -3.298430 | 0.115790  | 3.308387  |
| H    | -1.180561 | -0.054969 | -1.703131 |
| H    | -4.422815 | -0.556837 | -0.380987 |
| H    | -4.197840 | 1.197529  | -0.345715 |
| H    | -3.599245 | 0.256291  | -1.713368 |
| H    | -2.623099 | -0.105780 | 10.257839 |
| H    | 2.261337  | -0.619471 | 5.303782  |
| H    | 0.827218  | -0.337779 | -0.465129 |
| H    | -0.133904 | -0.403582 | 9.682875  |
| H    | 1.301719  | -0.474007 | 3.835718  |
| H    | -0.963597 | -0.190141 | 4.023923  |
| H    | -4.277698 | 0.271381  | 1.851009  |

**TABLE S19:** Cartesian coordinates of the modified base pair m<sup>2</sup>G:C W:WC

Calculated energy (in Hartrees) = -976.86511642

| ATOM | X         | Y         | Z         |
|------|-----------|-----------|-----------|
| N    | -0.060887 | -0.092608 | 0.034176  |
| C    | -0.052398 | -0.031656 | 1.419587  |
| N    | 1.153296  | 0.019736  | 1.920050  |
| C    | 1.987004  | -0.008383 | 0.814428  |
| C    | 3.415138  | 0.022157  | 0.713579  |
| O    | 4.252380  | 0.082705  | 1.627748  |
| N    | 3.834640  | -0.026371 | -0.627309 |
| C    | 3.009253  | -0.095058 | -1.731048 |
| N    | 3.617262  | -0.133371 | -2.935083 |
| C    | 2.855389  | -0.205192 | -4.166303 |
| N    | 1.685096  | -0.123793 | -1.648600 |
| C    | 1.249696  | -0.078485 | -0.372398 |
| N    | 8.634629  | 0.011569  | -2.387821 |
| C    | 7.233017  | -0.014464 | -2.231551 |
| O    | 6.533402  | -0.075238 | -3.247478 |
| N    | 6.749055  | 0.029642  | -0.962904 |
| C    | 7.571102  | 0.095026  | 0.092489  |
| N    | 7.019474  | 0.135397  | 1.308267  |
| C    | 9.007013  | 0.121676  | -0.064253 |
| C    | 9.489346  | 0.077656  | -1.330635 |
| H    | -0.971601 | -0.029070 | 1.989516  |
| H    | 2.193240  | 0.660109  | -4.280881 |
| H    | 2.233466  | -1.106377 | -4.202280 |
| H    | 3.561620  | -0.226124 | -4.998168 |
| H    | 5.987190  | 0.116300  | 1.422418  |
| H    | 9.669907  | 0.174456  | 0.789507  |
| H    | 10.548640 | 0.092294  | -1.562225 |
| H    | 8.968677  | -0.022396 | -3.340691 |
| H    | -0.861144 | -0.139080 | -0.577816 |
| H    | 7.605723  | 0.184841  | 2.125398  |
| H    | 4.857734  | -0.007416 | -0.770969 |
| H    | 4.637457  | -0.109466 | -2.992329 |

**TABLE S20:** Cartesian coordinates of the modified base pair  $\Psi$ :A W:WC

Calculated energy (in Hartrees) = -882.182649

| ATOM | X         | Y         | Z         |
|------|-----------|-----------|-----------|
| N    | 0.339967  | -0.037448 | -0.099052 |
| C    | 0.253650  | 0.023039  | 1.277640  |
| N    | 1.420666  | 0.110258  | 1.868101  |
| C    | 2.325576  | 0.106981  | 0.820507  |
| C    | 3.737680  | 0.177094  | 0.785590  |
| N    | 4.496172  | 0.267877  | 1.890646  |
| N    | 4.331290  | 0.149939  | -0.429417 |
| C    | 3.575611  | 0.059061  | -1.541839 |
| N    | 2.248530  | -0.012522 | -1.630151 |
| C    | 1.678965  | 0.015808  | -0.415591 |
| N    | 9.267164  | 0.402395  | 0.112229  |
| C    | 7.894321  | 0.353107  | 0.331045  |
| N    | 7.142757  | 0.265569  | -0.808888 |
| C    | 7.613275  | 0.223019  | -2.133518 |
| C    | 9.069457  | 0.281279  | -2.254122 |
| C    | 9.830430  | 0.367424  | -1.143451 |
| O    | 7.434335  | 0.387943  | 1.472332  |
| O    | 6.829921  | 0.143783  | -3.069803 |
| H    | -0.701561 | -0.001711 | 1.784550  |
| H    | 5.512541  | 0.314515  | 1.820098  |
| H    | 4.139474  | 0.043779  | -2.471901 |
| H    | 10.913465 | 0.413625  | -1.169731 |
| H    | -0.418956 | -0.107182 | -0.760063 |
| H    | 9.503256  | 0.253217  | -3.243841 |
| H    | 4.042680  | 0.285312  | 2.789375  |
| H    | 6.103065  | 0.225392  | -0.674437 |
| H    | 9.833608  | 0.467253  | 0.945048  |

**TABLE S21:** Cartesian coordinates of the modified base pair m<sup>7</sup>G:C W:WC

Calculated energy (in Hartrees) = -977.279020

| ATOM | X         | Y         | Z         |
|------|-----------|-----------|-----------|
| N    | 4.588670  | -0.749589 | 0.000493  |
| C    | 3.204366  | -0.959407 | -0.000349 |
| O    | 2.787861  | -2.124885 | -0.000601 |
| N    | 2.398983  | 0.139644  | -0.000780 |
| C    | 2.927447  | 1.373061  | 0.000033  |
| N    | 2.084526  | 2.413571  | -0.000585 |
| C    | 4.348886  | 1.592413  | 0.001188  |
| C    | 5.143351  | 0.492311  | 0.001218  |
| N    | -4.338760 | -1.097529 | 0.000501  |
| C    | -4.809890 | 0.169472  | 0.001019  |
| N    | -3.788603 | 1.020184  | 0.000895  |
| C    | -2.611688 | 0.281977  | 0.000182  |
| C    | -1.228441 | 0.668820  | -0.001011 |
| O    | -0.790360 | 1.822180  | -0.001747 |
| N    | -0.404116 | -0.456326 | -0.001246 |
| C    | -0.838308 | -1.770053 | -0.000321 |
| N    | 0.090789  | -2.718057 | 0.000272  |
| N    | -2.138000 | -2.115375 | -0.000053 |
| C    | -2.948961 | -1.067045 | 0.000109  |
| C    | -3.879478 | 2.486540  | 0.000303  |
| H    | 1.074641  | 2.260816  | -0.000663 |
| H    | 4.768424  | 2.589574  | 0.001525  |
| H    | 6.226115  | 0.541636  | 0.001950  |
| H    | -0.233218 | -3.673503 | 0.001124  |
| H    | -4.930999 | 2.772585  | 0.000822  |
| H    | -3.380066 | 2.876127  | 0.887388  |
| H    | -3.381290 | 2.874929  | -0.887990 |
| H    | -4.903113 | -1.937771 | 0.000875  |
| H    | 0.629354  | -0.255972 | -0.001664 |
| H    | 1.106478  | -2.509289 | 0.000743  |
| H    | 2.438827  | 3.356120  | 0.002056  |
| H    | 5.158948  | -1.585135 | 0.000506  |
| H    | -5.852230 | 0.447333  | 0.001412  |



**TABLE S22:** Cartesian coordinates of the modified base pair m<sup>2</sup>G:A W:WC

Calculated energy (in Hartrees) = -1088.539726

| ATOM | X         | Y         | Z         |
|------|-----------|-----------|-----------|
| N    | -0.140740 | 0.012901  | -0.005843 |
| C    | -0.301172 | 0.173502  | 1.360439  |
| N    | 0.835749  | 0.248638  | 2.002281  |
| C    | 1.796044  | 0.133033  | 1.014197  |
| C    | 3.228790  | 0.114662  | 1.094651  |
| O    | 3.940760  | 0.208391  | 2.097403  |
| N    | 3.813853  | -0.055265 | -0.184523 |
| C    | 3.124855  | -0.136737 | -1.373779 |
| N    | 3.872062  | -0.272778 | -2.528742 |
| N    | 1.807776  | -0.120149 | -1.450947 |
| C    | 1.209928  | -0.014893 | -0.242114 |
| C    | 3.122810  | -0.482850 | -3.764494 |
| C    | 5.081925  | 0.534241  | -2.709338 |
| N    | 10.458868 | -2.178816 | 0.516977  |
| C    | 10.698766 | -1.606368 | 1.750948  |
| N    | 9.668284  | -0.952569 | 2.228617  |
| C    | 8.696748  | -1.100837 | 1.254211  |
| C    | 7.358144  | -0.645148 | 1.176726  |
| N    | 6.779556  | 0.087007  | 2.139032  |
| N    | 6.652609  | -0.965602 | 0.061412  |
| C    | 7.241081  | -1.717080 | -0.889620 |
| N    | 8.477946  | -2.208175 | -0.922240 |
| C    | 9.162687  | -1.861719 | 0.179856  |
| H    | -1.282742 | 0.226838  | 1.811221  |
| H    | 3.817690  | -0.842753 | -4.528040 |
| H    | 2.644165  | 0.438808  | -4.124926 |
| H    | 2.344465  | -1.227154 | -3.603287 |
| H    | 4.838416  | 1.546935  | -3.065427 |
| H    | 5.650686  | 0.614956  | -1.785397 |
| H    | 5.721087  | 0.053353  | -3.454630 |
| H    | 11.655972 | -1.709248 | 2.243983  |
| H    | 5.759092  | 0.207764  | 2.139187  |
| H    | 6.609930  | -1.951180 | -1.744385 |
| H    | -0.861380 | -0.060716 | -0.707884 |
| H    | 11.095021 | -2.731032 | -0.038075 |
| H    | 7.295476  | 0.222594  | 2.994728  |
| H    | 4.819429  | -0.298742 | -0.158987 |

**TABLE S23:** Cartesian coordinates of the modified base pair Gm:C W:WC

Calculated energy (in Hartrees) = -1397.875810

| ATOM | X         | Y         | Z         |
|------|-----------|-----------|-----------|
| C    | 6.618932  | -1.405668 | -0.812750 |
| C    | 5.623942  | -0.277774 | -0.633936 |
| O    | 4.360627  | -0.660366 | -1.210700 |
| C    | 5.266543  | 0.071357  | 0.822259  |
| O    | 6.226539  | 0.843473  | 1.497570  |
| C    | 3.907578  | 0.778802  | 0.647590  |
| O    | 4.200470  | 2.148157  | 0.409087  |
| C    | 3.105969  | 3.028031  | 0.659396  |
| C    | 3.317035  | 0.098855  | -0.620988 |
| N    | 2.202102  | -0.795681 | -0.353524 |
| C    | 2.229961  | -2.156029 | -0.061814 |
| N    | 1.045235  | -2.658626 | 0.166787  |
| C    | 0.180743  | -1.587110 | 0.026814  |
| C    | -1.242915 | -1.503775 | 0.146232  |
| O    | -2.052332 | -2.402791 | 0.418328  |
| N    | -1.700799 | -0.192111 | -0.094715 |
| C    | -0.915927 | 0.893188  | -0.401264 |
| N    | -1.552701 | 2.070925  | -0.577103 |
| N    | 0.405121  | 0.827488  | -0.512414 |
| C    | 0.879725  | -0.420931 | -0.297212 |
| N    | -6.531332 | 1.453008  | -0.196725 |
| C    | -5.128520 | 1.318534  | -0.248249 |
| O    | -4.457540 | 2.313708  | -0.540529 |
| N    | -4.611451 | 0.093475  | 0.031070  |
| C    | -5.404699 | -0.941556 | 0.338028  |
| N    | -4.823317 | -2.116899 | 0.591753  |
| C    | -6.841418 | -0.805476 | 0.396354  |
| C    | -7.356428 | 0.417900  | 0.120110  |
| H    | 7.569582  | -1.126155 | -0.349074 |
| H    | 6.794185  | -1.612881 | -1.871373 |
| H    | 5.990951  | 0.635897  | -1.126883 |
| H    | 5.124265  | -0.858879 | 1.385467  |
| H    | 6.019093  | 1.763714  | 1.265396  |
| H    | 3.244872  | 0.669512  | 1.514564  |
| H    | 2.221038  | 2.745368  | 0.076959  |
| H    | 2.840241  | 3.025635  | 1.725848  |
| H    | 3.436454  | 4.028580  | 0.373139  |
| H    | 2.949242  | 0.871526  | -1.305935 |
| H    | 3.159961  | -2.703699 | -0.071694 |
| H    | -0.989099 | 2.848282  | -0.877413 |
| H    | -5.387873 | -2.919225 | 0.818572  |
| H    | -7.480415 | -1.640904 | 0.650812  |

|   |           |           |           |
|---|-----------|-----------|-----------|
| H | -8.419685 | 0.630064  | 0.132892  |
| H | -6.889837 | 2.373658  | -0.408230 |
| H | -3.792966 | -2.222480 | 0.526871  |
| H | -2.572061 | 2.156141  | -0.564248 |
| H | -2.726065 | -0.063609 | -0.048064 |
| H | 6.254714  | -2.321378 | -0.335576 |

**TABLE S24:** Cartesian coordinates of the modified base pair  $\Psi$ :G W:WC

Calculated energy (in Hartrees) = -957.421341

| ATOM | X         | Y         | Z         |
|------|-----------|-----------|-----------|
| N    | -0.114040 | 0.022505  | 0.058581  |
| C    | -0.061686 | -0.016001 | 1.458741  |
| N    | 1.232018  | -0.030783 | 1.962609  |
| C    | 2.406747  | -0.010796 | 1.220669  |
| C    | 2.239547  | 0.028354  | -0.221936 |
| C    | 0.992760  | 0.043791  | -0.744688 |
| O    | -1.069124 | -0.034190 | 2.135047  |
| O    | 3.516478  | -0.025519 | 1.774111  |
| N    | 4.324143  | -0.172596 | 8.461269  |
| C    | 2.995748  | -0.224812 | 8.853802  |
| N    | 2.165308  | -0.207889 | 7.845249  |
| C    | 2.979214  | -0.140128 | 6.728661  |
| C    | 2.657771  | -0.101000 | 5.332000  |
| O    | 1.553088  | -0.121842 | 4.777349  |
| N    | 3.829553  | -0.032365 | 4.548506  |
| C    | 5.112755  | -0.011684 | 5.022557  |
| N    | 6.097459  | 0.103619  | 4.082520  |
| N    | 5.428054  | -0.058363 | 6.302089  |
| C    | 4.330084  | -0.117295 | 7.091831  |
| H    | 0.801808  | 0.073880  | -1.811847 |
| H    | 2.717470  | -0.273550 | 9.897687  |
| H    | 7.032376  | -0.092701 | 4.403081  |
| H    | 3.124477  | 0.045519  | -0.841562 |
| H    | 5.142875  | -0.169712 | 9.050471  |
| H    | 5.878544  | -0.105936 | 3.119849  |
| H    | 1.309301  | -0.061410 | 3.001289  |
| H    | -1.048011 | 0.033884  | -0.325251 |
| H    | 3.675409  | -0.021847 | 3.527840  |

**TABLE S25:** Cartesian coordinates of the modified base pair Um:A W:WC

Calculated energy (in Hartrees) = -1342.504906

| ATOM | X         | Y         | Z         |
|------|-----------|-----------|-----------|
| N    | 4.620099  | 17.721264 | 5.685428  |
| C    | 3.395825  | 17.114434 | 5.377956  |
| N    | 3.147769  | 16.946672 | 4.037493  |
| C    | 3.975014  | 17.317055 | 2.977218  |
| C    | 5.214495  | 17.952721 | 3.381555  |
| C    | 5.481013  | 18.132370 | 4.695997  |
| C    | 4.899954  | 17.927248 | 7.129827  |
| C    | 5.333884  | 16.624264 | 7.850104  |
| O    | 4.846896  | 16.586954 | 9.181805  |
| C    | 3.573006  | 15.957345 | 9.335292  |
| C    | 6.861924  | 16.797269 | 7.967014  |
| C    | 6.988210  | 18.321959 | 8.129171  |
| O    | 7.438398  | 16.049726 | 9.005576  |
| O    | 5.960413  | 18.850175 | 7.257281  |
| C    | 8.329286  | 18.915543 | 7.752123  |
| N    | -2.800568 | 13.866185 | 2.570743  |
| C    | -2.705490 | 13.862117 | 1.193091  |
| N    | -1.601262 | 14.409657 | 0.747298  |
| C    | -0.932506 | 14.795853 | 1.896024  |
| C    | 0.311441  | 15.439401 | 2.098246  |
| N    | 1.117495  | 15.812490 | 1.093260  |
| N    | 0.685044  | 15.679801 | 3.377507  |
| C    | -0.121992 | 15.306447 | 4.389498  |
| N    | -1.304960 | 14.698437 | 4.320273  |
| C    | -1.657422 | 14.469133 | 3.045416  |
| H    | 3.981124  | 18.318059 | 7.575297  |
| H    | 5.032750  | 15.727884 | 7.297598  |
| H    | 3.309809  | 16.046302 | 10.391051 |
| H    | 3.629123  | 14.894570 | 9.063365  |
| H    | 2.811351  | 16.436179 | 8.713749  |
| H    | 7.341250  | 16.492858 | 7.028146  |
| H    | 6.737784  | 18.580243 | 9.167954  |
| H    | 6.758934  | 16.020896 | 9.699965  |
| H    | 9.099841  | 18.509635 | 8.414225  |
| H    | 8.321875  | 20.004216 | 7.853044  |
| H    | -3.486020 | 13.439329 | 0.575041  |
| H    | 2.010844  | 16.272362 | 1.284559  |
| H    | 0.258168  | 15.539747 | 5.381479  |
| O    | 2.617915  | 16.758494 | 6.259004  |
| O    | 3.638178  | 17.105563 | 1.808709  |
| H    | 5.900425  | 18.284263 | 2.614560  |
| H    | 6.373282  | 18.624872 | 5.058109  |

|   |           |           |          |
|---|-----------|-----------|----------|
| H | 2.236044  | 16.483974 | 3.800829 |
| H | 8.593642  | 18.663369 | 6.719598 |
| H | 0.827098  | 15.626772 | 0.147075 |
| H | -3.553527 | 13.503433 | 3.135681 |

**TABLE S26:** Cartesian coordinates of the modified base pair m<sup>5</sup>U:G W:WC

Calculated energy (in Hartrees) = -996.742093

| ATOM | X         | Y         | Z         |
|------|-----------|-----------|-----------|
| N    | -0.274496 | -0.122337 | -0.031376 |
| C    | 1.090861  | -0.317364 | 0.105609  |
| N    | 1.757112  | 0.801578  | 0.212498  |
| C    | 0.789971  | 1.787849  | 0.141654  |
| C    | 0.898685  | 3.216752  | 0.206101  |
| O    | 1.900744  | 3.924261  | 0.347919  |
| N    | -0.372528 | 3.821699  | 0.083448  |
| C    | -1.564058 | 3.165109  | -0.061635 |
| N    | -2.672709 | 3.954717  | -0.201502 |
| N    | -1.683328 | 1.853719  | -0.110067 |
| C    | -0.484433 | 1.231730  | -0.010247 |
| N    | 0.496318  | 8.660775  | 0.595878  |
| C    | 0.562181  | 7.287010  | 0.484106  |
| N    | 1.824801  | 6.767583  | 0.554381  |
| C    | 3.021240  | 7.499033  | 0.723789  |
| C    | 2.854532  | 8.958205  | 0.832288  |
| C    | 4.091928  | 9.785508  | 1.013594  |
| C    | 1.607216  | 9.467503  | 0.763450  |
| O    | -0.470343 | 6.619782  | 0.332560  |
| O    | 4.098279  | 6.930567  | 0.772734  |
| H    | 1.520678  | -1.309623 | 0.117937  |
| H    | -2.623491 | 4.911973  | 0.114948  |
| H    | 4.783404  | 9.633832  | 0.178550  |
| H    | 3.853651  | 10.850120 | 1.084513  |
| H    | 4.629033  | 9.483242  | 1.918333  |
| H    | 1.399790  | 10.529713 | 0.834670  |
| H    | -0.431588 | 9.052914  | 0.539206  |
| H    | -0.991736 | -0.824387 | -0.132468 |
| H    | -3.554629 | 3.478900  | -0.091013 |
| H    | 1.913961  | 5.734701  | 0.478448  |
| H    | -0.373822 | 4.850727  | 0.129732  |

**TABLE S27:** Cartesian coordinates of the modified base pair m<sup>2</sup>G: C W:W(+)  
 Calculated energy (in Hartrees) = -977.265178

| ATOM | X         | Y         | Z         |
|------|-----------|-----------|-----------|
| N    | 59.148545 | 48.015478 | 16.084783 |
| C    | 60.167773 | 48.958139 | 16.049635 |
| N    | 61.360161 | 48.428551 | 16.094487 |
| C    | 61.121900 | 47.067495 | 16.162453 |
| C    | 62.007338 | 45.972222 | 16.232819 |
| O    | 63.270792 | 46.004629 | 16.249153 |
| N    | 61.350906 | 44.741143 | 16.287465 |
| C    | 59.972949 | 44.578990 | 16.276763 |
| N    | 59.513436 | 43.309577 | 16.319100 |
| C    | 58.087506 | 43.004942 | 16.363387 |
| N    | 59.130889 | 45.593683 | 16.215463 |
| C    | 59.744808 | 46.789458 | 16.157401 |
| H    | 59.952509 | 50.016151 | 15.990804 |
| H    | 61.943944 | 43.909972 | 16.329975 |
| H    | 60.172851 | 42.559342 | 16.455953 |
| H    | 57.634175 | 43.336282 | 17.303017 |
| H    | 57.571727 | 43.499465 | 15.537995 |
| H    | 57.966849 | 41.925716 | 16.265893 |
| N    | 65.580195 | 41.871373 | 16.483223 |
| C    | 64.508186 | 42.760215 | 16.428030 |
| O    | 63.341927 | 42.394114 | 16.437223 |
| N    | 64.877399 | 44.085884 | 16.362206 |
| C    | 66.149059 | 44.538753 | 16.348149 |
| N    | 66.323159 | 45.855931 | 16.280604 |
| C    | 67.218107 | 43.593724 | 16.405824 |
| C    | 66.881484 | 42.275780 | 16.472107 |
| H    | 67.247251 | 46.260045 | 16.266258 |
| H    | 65.516490 | 46.473933 | 16.241606 |
| H    | 68.252014 | 43.909780 | 16.397250 |
| H    | 67.625635 | 41.489080 | 16.518967 |
| H    | 58.153189 | 48.186518 | 16.062117 |
| H    | 65.337241 | 40.889032 | 16.531802 |
| H    | 64.062542 | 44.847579 | 16.316249 |

**TABLE S28:** Cartesian coordinates of the modified base pair m<sup>2</sup>G:U W:WC

Calculated energy (in Hartrees) = -996.728780

| ATOM | X         | Y         | Z         |
|------|-----------|-----------|-----------|
| N    | 0.085151  | 0.035719  | 0.083342  |
| C    | 0.174404  | -0.115489 | 1.458291  |
| N    | 1.408103  | -0.162664 | 1.886203  |
| C    | 2.175650  | -0.035812 | 0.742611  |
| C    | 3.599035  | -0.021164 | 0.562331  |
| O    | 4.498614  | -0.123162 | 1.402981  |
| N    | 3.930409  | 0.134965  | -0.800084 |
| C    | 3.041769  | 0.249424  | -1.840432 |
| N    | 3.592777  | 0.418026  | -3.074912 |
| C    | 2.784161  | 0.399614  | -4.280633 |
| N    | 1.730864  | 0.225337  | -1.691081 |
| C    | 1.369298  | 0.088992  | -0.393146 |
| N    | 8.880883  | -0.033702 | -0.894416 |
| C    | 7.536817  | -0.017114 | -0.558099 |
| O    | 6.679948  | 0.107506  | -1.442235 |
| N    | 7.273697  | -0.144973 | 0.775727  |
| C    | 8.231364  | -0.287219 | 1.812522  |
| O    | 7.881565  | -0.393118 | 2.972807  |
| C    | 9.619261  | -0.291561 | 1.346653  |
| C    | 9.891691  | -0.166834 | 0.033773  |
| H    | -0.709793 | -0.183145 | 2.077235  |
| H    | 1.941320  | 1.084111  | -4.168541 |
| H    | 3.402062  | 0.730680  | -5.117734 |
| H    | 2.383167  | -0.597532 | -4.503599 |
| H    | 10.400633 | -0.396963 | 2.086157  |
| H    | 10.898062 | -0.163064 | -0.369333 |
| H    | -0.750474 | 0.097716  | -0.478202 |
| H    | 4.938646  | 0.152661  | -1.002626 |
| H    | 6.272773  | -0.138290 | 1.060172  |
| H    | 9.077565  | 0.063331  | -1.879344 |
| H    | 4.586481  | 0.261342  | -3.157281 |

**TABLE 29:** Cartesian coordinates of the modified base pair Gm:A W:WCCalculated energy (in Hartrees) =  $-1470.245784$ 

| ATOM | X         | Y         | Z         |
|------|-----------|-----------|-----------|
| C    | 0.185767  | -0.725044 | -0.078515 |
| C    | 0.205560  | -0.335728 | 1.384757  |
| O    | 1.514893  | 0.158089  | 1.732008  |
| C    | -0.732445 | 0.819460  | 1.778366  |
| O    | -2.084366 | 0.465188  | 1.913848  |
| C    | -0.082531 | 1.314509  | 3.085949  |
| O    | -0.624813 | 0.513029  | 4.125945  |
| C    | -0.492446 | 1.078966  | 5.426476  |
| C    | 1.425342  | 1.004389  | 2.865250  |
| N    | 2.240712  | 2.185268  | 2.612957  |
| C    | 2.524937  | 2.792880  | 1.395725  |
| N    | 3.261951  | 3.867217  | 1.514459  |
| C    | 3.482233  | 3.987159  | 2.872750  |
| C    | 4.222168  | 4.962692  | 3.621360  |
| O    | 4.828441  | 5.958176  | 3.217359  |
| N    | 4.201239  | 4.661172  | 5.005449  |
| C    | 3.525502  | 3.621821  | 5.580471  |
| N    | 3.641643  | 3.506298  | 6.945920  |
| N    | 2.820542  | 2.732594  | 4.910953  |
| C    | 2.857412  | 2.952556  | 3.571158  |
| N    | 7.803160  | 9.001055  | 9.048138  |
| C    | 7.873476  | 10.040839 | 8.141796  |
| N    | 7.315280  | 9.762567  | 6.989025  |
| C    | 6.851152  | 8.468879  | 7.145585  |
| C    | 6.167648  | 7.597551  | 6.262451  |
| N    | 5.832461  | 7.945080  | 5.013623  |
| N    | 5.842905  | 6.364525  | 6.732376  |
| C    | 6.206890  | 6.024782  | 7.984606  |
| N    | 6.849469  | 6.750780  | 8.895231  |
| C    | 7.143655  | 7.971343  | 8.417270  |
| H    | -0.816223 | -1.073672 | -0.345585 |
| H    | 0.900834  | -1.526443 | -0.282650 |
| H    | -0.035916 | -1.206577 | 2.013368  |
| H    | -0.666139 | 1.605920  | 1.016765  |
| H    | -2.168229 | 0.119235  | 2.817495  |
| H    | -0.256236 | 2.378599  | 3.286292  |
| H    | 0.554821  | 1.299674  | 5.665678  |
| H    | -1.074969 | 2.007313  | 5.511027  |
| H    | -0.884264 | 0.343099  | 6.131623  |
| H    | 1.834841  | 0.520390  | 3.759577  |
| H    | 2.179228  | 2.361635  | 0.468808  |
| H    | 2.997279  | 2.845503  | 7.354835  |
| H    | 8.350146  | 10.978259 | 8.394453  |



|   |          |          |           |
|---|----------|----------|-----------|
| H | 6.141708 | 8.843446 | 4.676507  |
| H | 5.939876 | 5.011890 | 8.282500  |
| H | 5.467760 | 7.250701 | 4.349268  |
| H | 8.167694 | 8.980653 | 9.988674  |
| H | 3.768608 | 4.361598 | 7.468115  |
| H | 4.796026 | 5.262798 | 5.609221  |
| H | 0.437154 | 0.132547 | -0.711027 |

**TABLE S30:** Cartesian coordinates of the modified base pair Cm:Gm W:WC  
 Calculated energy (in Hartrees) = -1858.197781

| ATOM | X         | Y         | Z         |
|------|-----------|-----------|-----------|
| N    | -4.483947 | 0.552236  | -0.573894 |
| C    | -3.091601 | 0.359235  | -0.411559 |
| N    | -2.292873 | 1.448577  | -0.328800 |
| C    | -2.799061 | 2.689146  | -0.397084 |
| C    | -4.207062 | 2.905977  | -0.582470 |
| C    | -5.002083 | 1.808857  | -0.670482 |
| O    | -2.669000 | -0.808643 | -0.345640 |
| N    | -1.949704 | 3.715433  | -0.292969 |
| C    | -5.328041 | -0.665733 | -0.671948 |
| C    | -5.569888 | -1.335135 | 0.705261  |
| O    | -5.647880 | -2.746619 | 0.584376  |
| C    | -4.403189 | -3.428956 | 0.740353  |
| C    | -6.995730 | -0.867724 | 1.058962  |
| C    | -7.650085 | -0.797500 | -0.331567 |
| O    | -6.592195 | -0.302010 | -1.187211 |
| O    | -7.655198 | -1.701837 | 1.974675  |
| C    | -8.861138 | 0.104761  | -0.443555 |
| C    | 8.838891  | -0.079906 | 1.487186  |
| C    | 7.663504  | -0.801823 | 0.862174  |
| O    | 6.439446  | -0.317186 | 1.445296  |
| C    | 7.462743  | -0.564360 | -0.645285 |
| O    | 8.327899  | -1.291046 | -1.479748 |
| C    | 5.973598  | -0.927152 | -0.822452 |
| O    | 5.931484  | -2.325317 | -1.069356 |
| C    | 4.718230  | -2.773385 | -1.669397 |
| C    | 5.358016  | -0.579651 | 0.564637  |
| N    | 4.488004  | 0.584325  | 0.556631  |
| C    | 4.833120  | 1.924486  | 0.702245  |
| N    | 3.812677  | 2.734231  | 0.594937  |
| C    | 2.732698  | 1.901638  | 0.360893  |
| C    | 1.345493  | 2.192681  | 0.162467  |
| O    | 0.778954  | 3.294433  | 0.145364  |
| N    | 0.597218  | 1.012142  | -0.031221 |
| C    | 1.099487  | -0.265810 | -0.045562 |

|   |           |           |           |
|---|-----------|-----------|-----------|
| N | 0.215648  | -1.262448 | -0.281311 |
| N | 2.383432  | -0.546741 | 0.132212  |
| C | 3.131243  | 0.562489  | 0.334260  |
| H | -4.622897 | 3.902322  | -0.661849 |
| H | -6.069862 | 1.856003  | -0.836725 |
| H | -0.937609 | 3.555165  | -0.138544 |
| H | -4.809084 | -1.352208 | -1.345593 |
| H | -4.813847 | -1.046428 | 1.442860  |
| H | -4.607151 | -4.487841 | 0.569763  |
| H | -4.009582 | -3.294221 | 1.757085  |
| H | -3.657431 | -3.067354 | 0.026811  |
| H | -6.957895 | 0.140302  | 1.490583  |
| H | -7.907813 | -1.819131 | -0.644515 |
| H | -7.327547 | -2.596086 | 1.781300  |
| H | -9.654455 | -0.277579 | 0.205551  |
| H | -9.236630 | 0.137200  | -1.469883 |
| H | 9.765595  | -0.425185 | 1.019403  |
| H | 8.752559  | 1.001056  | 1.336206  |
| H | 7.749293  | -1.886571 | 1.031765  |
| H | 7.606316  | 0.502211  | -0.857417 |
| H | 7.895339  | -2.151828 | -1.605286 |
| H | 5.483059  | -0.376814 | -1.634350 |
| H | 4.789974  | -3.860075 | -1.749567 |
| H | 3.844776  | -2.502210 | -1.064511 |
| H | 4.596611  | -2.344060 | -2.673935 |
| H | 4.753007  | -1.425368 | 0.912275  |
| H | 5.850837  | 2.211868  | 0.918533  |
| H | -0.420821 | 1.145870  | -0.156546 |
| H | 0.566558  | -2.198920 | -0.167565 |
| H | 8.895149  | -0.275041 | 2.561500  |
| H | -8.620377 | 1.125721  | -0.128001 |
| H | -0.794309 | -1.101552 | -0.282977 |
| H | -2.297900 | 4.659475  | -0.329967 |

**TABLE S31:** Cartesian coordinates of the modified base pair m<sup>5</sup>U:A W:HT

Calculated energy (in Hartrees) = -921.506889

| ATOM | X         | Y         | Z         |
|------|-----------|-----------|-----------|
| N    | 0.119475  | -0.051615 | 0.030122  |
| C    | 0.220051  | -0.213682 | 1.403298  |
| N    | 1.508164  | -0.213350 | 1.869587  |
| C    | 2.679539  | -0.070875 | 1.118814  |
| C    | 2.481864  | 0.095676  | -0.327591 |
| C    | 3.697580  | 0.253895  | -1.191816 |
| C    | 1.214192  | 0.096852  | -0.797776 |
| O    | -0.776812 | -0.343743 | 2.112598  |
| O    | 3.777845  | -0.089051 | 1.667191  |

|   |           |           |           |
|---|-----------|-----------|-----------|
| N | 3.350981  | -0.677725 | 6.378809  |
| C | 3.229544  | -0.519924 | 5.020366  |
| N | 1.976843  | -0.527170 | 4.626741  |
| C | 1.232387  | -0.698116 | 5.781771  |
| C | -0.158184 | -0.788607 | 6.033570  |
| N | -1.093541 | -0.713438 | 5.069419  |
| N | -0.556584 | -0.959468 | 7.312858  |
| C | 0.373908  | -1.034642 | 8.274990  |
| N | 1.706333  | -0.964078 | 8.168895  |
| C | 2.073549  | -0.795017 | 6.893409  |
| H | 3.426156  | 0.369537  | -2.244604 |
| H | 4.282418  | 1.126519  | -0.883094 |
| H | 4.358970  | -0.613167 | -1.093924 |
| H | 0.983515  | 0.214345  | -1.851293 |
| H | 4.073549  | -0.403087 | 4.353893  |
| H | -0.872765 | -0.584805 | 4.084525  |
| H | -0.012600 | -1.172430 | 9.282904  |
| H | -0.820261 | -0.048625 | -0.337917 |
| H | 4.205044  | -0.705034 | 6.914912  |
| H | -2.056383 | -0.789059 | 5.356698  |
| H | 1.629337  | -0.332826 | 2.901302  |

**TABLE S32:** Cartesian coordinates of the modified base pair m<sup>7</sup>G:G W:HT

Calculated energy (in Hartrees) = -1124.896396

| ATOM | X         | Y         | Z         |
|------|-----------|-----------|-----------|
| N    | 0.099128  | 0.036437  | -0.035682 |
| C    | 0.073833  | 0.115904  | 1.338458  |
| N    | 1.281638  | 0.133868  | 1.850597  |
| C    | 2.137065  | 0.063346  | 0.769395  |
| C    | 3.562380  | 0.039630  | 0.722275  |
| O    | 4.380890  | 0.076077  | 1.645099  |
| N    | 4.013711  | -0.044682 | -0.615442 |
| C    | 3.207552  | -0.096328 | -1.735157 |
| N    | 3.825234  | -0.221026 | -2.938074 |
| N    | 1.890996  | -0.070035 | -1.681525 |
| C    | 1.416831  | 0.000684  | -0.421260 |
| N    | 1.745881  | 0.460007  | 8.599610  |
| C    | 0.425037  | 0.492170  | 8.887290  |
| N    | -0.271409 | 0.446740  | 7.755572  |
| C    | 0.624276  | 0.382914  | 6.697226  |
| C    | 0.429138  | 0.316255  | 5.270989  |
| O    | -0.637450 | 0.301368  | 4.666528  |
| N    | 1.671958  | 0.267731  | 4.620832  |
| C    | 2.903957  | 0.280021  | 5.234075  |
| N    | 3.987677  | 0.226926  | 4.459693  |
| N    | 3.065791  | 0.342789  | 6.567409  |

|   |           |           |           |
|---|-----------|-----------|-----------|
| C | 1.911133  | 0.390667  | 7.220975  |
| C | -1.735089 | 0.460540  | 7.632729  |
| H | -0.839682 | 0.157677  | 1.914438  |
| H | 4.788640  | 0.049663  | -3.058105 |
| H | 4.878952  | 0.236181  | 4.931856  |
| H | -2.170416 | 0.517629  | 8.630067  |
| H | -2.060021 | -0.449079 | 7.127611  |
| H | -2.035556 | 1.322326  | 7.036812  |
| H | 3.225544  | -0.144433 | -3.746198 |
| H | 5.020842  | -0.110114 | -0.709551 |
| H | -0.696691 | 0.007065  | -0.657366 |
| H | 1.603171  | 0.217497  | 3.571746  |
| H | 3.976927  | 0.174664  | 3.433642  |
| H | 2.498340  | 0.482467  | 9.275776  |
| H | 0.002891  | 0.546136  | 9.878259  |

**TABLE S33:** Cartesian coordinates of the modified base pair  $\Psi$ :A W:HT

Calculated energy (in Hartrees) = -882.216500

| ATOM | X         | Y         | Z         |
|------|-----------|-----------|-----------|
| N    | 4.225970  | 0.855955  | -0.000712 |
| C    | 2.876883  | 1.170653  | -0.001263 |
| N    | 2.044222  | 0.071652  | -0.001180 |
| C    | 2.427919  | -1.266051 | -0.000321 |
| C    | 3.858121  | -1.493576 | 0.000520  |
| C    | 4.697372  | -0.429901 | 0.000480  |
| O    | 2.466420  | 2.328496  | -0.002081 |
| O    | 1.569264  | -2.161495 | 0.000031  |
| N    | -2.429907 | 2.236634  | 0.000661  |
| C    | -1.075659 | 2.040423  | 0.000426  |
| N    | -0.745606 | 0.765415  | -0.000253 |
| C    | -1.954173 | 0.087423  | -0.000154 |
| C    | -2.288009 | -1.289201 | -0.000437 |
| N    | -1.372080 | -2.271486 | -0.000939 |
| N    | -3.602323 | -1.619233 | -0.000232 |
| C    | -4.516291 | -0.636061 | 0.000279  |
| N    | -4.328641 | 0.688261  | 0.000638  |
| C    | -3.019746 | 0.992906  | 0.000399  |
| H    | 5.776520  | -0.527754 | 0.001404  |
| H    | -0.371709 | 2.860681  | 0.000574  |
| H    | -0.368462 | -2.091759 | -0.000531 |
| H    | -5.553263 | -0.967684 | 0.000306  |
| H    | 4.229430  | -2.508982 | 0.001413  |
| H    | 4.870416  | 1.636542  | 0.000126  |
| H    | 1.024102  | 0.278947  | -0.000895 |
| H    | -1.697097 | -3.227223 | -0.000398 |
| H    | -2.904167 | 3.130282  | 0.001363  |

**TABLE S34:** Cartesian coordinates of the modified base pair m<sup>1</sup>A: m<sup>5</sup>U H:WT

Calculated energy (in Hartrees) = -961.213955

| ATOM | X         | Y         | Z         |
|------|-----------|-----------|-----------|
| N    | -0.027749 | 0.101952  | 0.249615  |
| C    | 0.090506  | 0.011609  | 1.613752  |
| N    | 1.376184  | -0.074178 | 2.057404  |
| C    | 2.554388  | -0.080224 | 1.289754  |
| C    | 2.340660  | 0.019341  | -0.157633 |
| C    | 3.544651  | 0.020153  | -1.052292 |
| C    | 1.065806  | 0.104985  | -0.603074 |
| O    | -0.897616 | 0.009700  | 2.366103  |
| O    | 3.638768  | -0.164514 | 1.852001  |
| N    | 2.975850  | -0.439911 | 6.760762  |
| C    | 2.966084  | -0.354743 | 5.388348  |
| N    | 1.747389  | -0.269308 | 4.903672  |
| C    | 0.924335  | -0.299425 | 6.000693  |
| C    | -0.486700 | -0.240902 | 6.095858  |
| N    | -1.300029 | -0.139727 | 5.057700  |
| N    | -0.964412 | -0.299307 | 7.394024  |
| C    | -2.417846 | -0.247375 | 7.632817  |
| C    | -0.110436 | -0.405566 | 8.481997  |
| N    | 1.186356  | -0.461494 | 8.430757  |
| C    | 1.671826  | -0.405847 | 7.172760  |
| H    | 3.259959  | 0.098037  | -2.103981 |
| H    | 4.128704  | -0.895176 | -0.914180 |
| H    | 4.207930  | 0.855285  | -0.806022 |
| H    | 0.821548  | 0.181563  | -1.656490 |
| H    | 3.863418  | -0.358293 | 4.783117  |
| H    | -2.301033 | -0.101002 | 5.176559  |
| H    | -2.910028 | -1.095012 | 7.148571  |
| H    | -2.602012 | -0.304699 | 8.704056  |
| H    | -2.827902 | 0.694490  | 7.258615  |
| H    | -0.607431 | -0.442615 | 9.445192  |
| H    | 3.787451  | -0.513954 | 7.361093  |
| H    | -0.968316 | 0.166445  | -0.113405 |
| H    | 1.503153  | -0.143372 | 3.075047  |
| H    | -0.959006 | -0.093585 | 4.068533  |

**TABLE S35:** Cartesian coordinates of the modified base pair s<sup>4</sup>U:A W:HT

Calculated energy (in Hartrees) = -1205.140661

| ATOM | X        | Y         | Z         |
|------|----------|-----------|-----------|
| N    | 0.108459 | 0.299979  | 0.140505  |
| C    | 0.162715 | 0.419471  | 1.522832  |
| N    | 1.416825 | 0.236385  | 2.064801  |
| C    | 2.579822 | -0.045745 | 1.366891  |
| C    | 2.425780 | -0.151276 | -0.064758 |

|   |           |           |           |
|---|-----------|-----------|-----------|
| C | 1.209497  | 0.022233  | -0.631610 |
| O | -0.844239 | 0.669004  | 2.176388  |
| S | 4.048609  | -0.246467 | 2.137188  |
| N | 2.671516  | 0.450668  | 6.865818  |
| C | 2.715052  | 0.325472  | 5.501000  |
| N | 1.535064  | 0.475926  | 4.940890  |
| C | 0.665489  | 0.713424  | 5.998530  |
| C | -0.728340 | 0.953562  | 6.083493  |
| N | -1.541580 | 0.993343  | 5.012673  |
| N | -1.266130 | 1.149043  | 7.306893  |
| C | -0.464848 | 1.107005  | 8.380020  |
| N | 0.853976  | 0.891163  | 8.436903  |
| C | 1.359183  | 0.701364  | 7.212607  |
| H | 3.298376  | -0.369871 | -0.662802 |
| H | 1.035389  | -0.045474 | -1.699291 |
| H | 3.624203  | 0.123409  | 4.950902  |
| H | -1.204394 | 0.880429  | 4.061214  |
| H | -0.959383 | 1.272229  | 9.335297  |
| H | -2.515829 | 1.186165  | 5.181771  |
| H | 3.445495  | 0.375834  | 7.508404  |
| H | -0.806738 | 0.432914  | -0.265322 |
| H | 1.459665  | 0.323167  | 3.106799  |

**TABLE S36:** Cartesian coordinates of the modified base pair m<sup>5</sup>U:G W:HT  
 Calculated energy (in Hartrees) = -996.730150

| ATOM | X         | Y         | Z          |
|------|-----------|-----------|------------|
| N    | -4.668439 | 66.914772 | 124.834116 |
| C    | -4.542709 | 66.147363 | 123.674359 |
| N    | -3.574544 | 66.626363 | 122.806360 |
| C    | -2.763536 | 67.747640 | 122.993277 |
| C    | -2.972809 | 68.487348 | 124.243665 |
| C    | -2.127459 | 69.701594 | 124.493116 |
| C    | -3.914810 | 68.033413 | 125.100840 |
| O    | -5.228692 | 65.162677 | 123.475664 |
| O    | -1.929363 | 68.081033 | 122.151258 |
| N    | -1.386325 | 65.771852 | 118.494997 |
| C    | -1.849733 | 66.210865 | 119.716147 |
| N    | -2.815035 | 65.452055 | 120.179465 |
| C    | -2.995879 | 64.470460 | 119.222019 |
| C    | -3.921041 | 63.367205 | 119.170495 |
| O    | -4.786211 | 63.006130 | 119.946137 |
| N    | -3.715083 | 62.630513 | 117.950325 |
| C    | -2.793636 | 62.908004 | 116.974007 |
| N    | -2.805591 | 62.102170 | 115.857886 |
| N    | -1.953356 | 63.914187 | 117.035073 |
| C    | -2.110950 | 64.655975 | 118.161625 |

|   |           |           |            |
|---|-----------|-----------|------------|
| H | -2.373547 | 70.165706 | 125.452310 |
| H | -1.063287 | 69.443425 | 124.493015 |
| H | -2.266431 | 70.444004 | 123.700249 |
| H | -4.127883 | 68.525039 | 126.044623 |
| H | -1.463118 | 67.079343 | 120.232615 |
| H | -3.045480 | 61.129497 | 115.989015 |
| H | -5.368604 | 66.585616 | 125.481928 |
| H | -0.654248 | 66.184179 | 117.936661 |
| H | -2.006181 | 62.253434 | 115.258286 |
| H | -4.382728 | 61.880064 | 117.820339 |
| H | -3.444112 | 66.092237 | 121.929828 |

**TABLE S37:** Cartesian coordinates of the modified base pair m<sup>1</sup>A:A H:WT  
 Calculated energy (in Hartrees) = -974.392266

| ATOM | X         | Y         | Z         |
|------|-----------|-----------|-----------|
| N    | 0.007861  | -0.102049 | -0.140508 |
| C    | -0.118448 | 0.158223  | 1.210050  |
| N    | 1.033168  | 0.291372  | 1.823572  |
| C    | 1.964701  | 0.112082  | 0.821102  |
| C    | 3.374966  | 0.123180  | 0.841159  |
| N    | 4.080594  | 0.354454  | 1.963220  |
| N    | 4.020102  | -0.094634 | -0.332000 |
| C    | 3.288196  | -0.329182 | -1.448593 |
| N    | 1.972514  | -0.368849 | -1.580225 |
| C    | 1.352588  | -0.136779 | -0.410671 |
| N    | 9.145877  | -0.843908 | 2.546486  |
| C    | 7.804591  | -0.823168 | 2.844884  |
| N    | 7.058562  | -0.470505 | 1.821212  |
| C    | 7.957528  | -0.252975 | 0.800713  |
| C    | 7.757898  | 0.145400  | -0.546980 |
| N    | 6.580825  | 0.359751  | -1.101150 |
| N    | 8.937145  | 0.300275  | -1.265982 |
| C    | 8.871196  | 0.725516  | -2.674827 |
| C    | 10.178609 | 0.054451  | -0.703713 |
| N    | 10.396645 | -0.333601 | 0.515849  |
| C    | 9.264058  | -0.474085 | 1.236773  |
| H    | -1.088705 | 0.236880  | 1.681115  |
| H    | 3.566323  | 0.426230  | 2.828289  |
| H    | 3.868062  | -0.510636 | -2.351810 |
| H    | 7.434764  | -1.073177 | 3.829467  |
| H    | 5.626536  | 0.154744  | -0.627369 |
| H    | 8.404788  | 1.711559  | -2.750835 |
| H    | 9.882574  | 0.789987  | -3.072125 |
| H    | 8.311160  | -0.005381 | -3.264545 |
| H    | 11.018938 | 0.209171  | -1.371726 |
| H    | 9.908870  | -1.078634 | 3.168485  |

|   |           |           |           |
|---|-----------|-----------|-----------|
| H | -0.736529 | -0.245172 | -0.808107 |
| H | 6.528512  | 0.675014  | -2.058694 |
| H | 5.071442  | 0.129887  | 1.985915  |

**TABLE S38:** Cartesian coordinates of the modified base pair m1A: m<sup>5</sup>Um H:WT

Calculated energy (in Hartrees) = -1421.531287

| ATOM | X         | Y         | Z         |
|------|-----------|-----------|-----------|
| N    | -1.890965 | 0.559467  | -0.336997 |
| C    | -0.541988 | 0.337989  | -0.178073 |
| N    | 0.202819  | 1.449030  | 0.074495  |
| C    | -0.231351 | 2.780513  | 0.180605  |
| C    | -1.668697 | 2.950047  | -0.007722 |
| C    | -2.238003 | 4.336663  | 0.066429  |
| C    | -2.411491 | 1.845256  | -0.259869 |
| O    | -0.032276 | -0.799952 | -0.254604 |
| O    | 0.586721  | 3.665915  | 0.405380  |
| C    | -2.767266 | -0.614000 | -0.601104 |
| C    | -3.319289 | -1.281319 | 0.689907  |
| O    | -3.342146 | -2.692686 | 0.557397  |
| C    | -4.794828 | -0.827633 | 0.704249  |
| C    | -5.100375 | -0.718940 | -0.800328 |
| O    | -5.645975 | -1.676160 | 1.422043  |
| O    | -3.873414 | -0.177973 | -1.354760 |
| C    | -6.263517 | 0.173614  | -1.174539 |
| C    | -2.168051 | -3.352219 | 1.018961  |
| N    | 5.130456  | 1.938039  | 0.429763  |
| C    | 3.784700  | 2.221837  | 0.466396  |
| N    | 3.046858  | 1.154542  | 0.258053  |
| C    | 3.940767  | 0.132301  | 0.073273  |
| C    | 3.724215  | -1.236941 | -0.205551 |
| N    | 2.528360  | -1.789436 | -0.338707 |
| N    | 4.888331  | -1.974396 | -0.333920 |
| C    | 4.803390  | -3.416635 | -0.624420 |
| C    | 6.140164  | -1.390405 | -0.200783 |
| N    | 6.374232  | -0.136947 | 0.047844  |
| C    | 5.250507  | 0.598933  | 0.177314  |
| H    | -3.316514 | 4.333922  | -0.106410 |
| H    | -1.766557 | 4.988474  | -0.675922 |
| H    | -2.041727 | 4.783841  | 1.046183  |
| H    | -3.474112 | 1.894458  | -0.454843 |
| H    | -2.154758 | -1.326608 | -1.159268 |
| H    | -2.761793 | -0.981564 | 1.585679  |
| H    | -4.867332 | 0.169643  | 1.156179  |
| H    | -5.252349 | -1.731331 | -1.200509 |
| H    | -5.310164 | -2.575418 | 1.276742  |
| H    | -6.385565 | 0.229177  | -2.259184 |



|   |           |           |           |
|---|-----------|-----------|-----------|
| H | -7.180915 | -0.235278 | -0.741626 |
| H | -2.307293 | -4.416431 | 0.820149  |
| H | -1.274417 | -2.991371 | 0.495811  |
| H | -2.031463 | -3.201847 | 2.098903  |
| H | 3.384143  | 3.212378  | 0.640548  |
| H | 4.301836  | -3.579572 | -1.582187 |
| H | 5.810623  | -3.824554 | -0.686889 |
| H | 4.267860  | -3.931500 | 0.177675  |
| H | 6.973112  | -2.074088 | -0.323023 |
| H | -6.122560 | 1.188205  | -0.787226 |
| H | 5.894034  | 2.589689  | 0.559839  |
| H | 1.214385  | 1.303411  | 0.179338  |
| H | 2.425251  | -2.769279 | -0.554293 |
| H | 1.639027  | -1.243968 | -0.261482 |

**TABLE S39:** Cartesian coordinates of the modified base pair Um:A W:HT

Calculated energy (in Hartrees) = -1342.503811

| ATOM | X         | Y         | Z         |
|------|-----------|-----------|-----------|
| N    | 0.081125  | 0.369898  | 0.144847  |
| C    | 0.055813  | 0.413612  | 1.539320  |
| N    | 1.268289  | 0.574288  | 2.144403  |
| C    | 2.523125  | 0.698749  | 1.525046  |
| C    | 2.460715  | 0.634633  | 0.073269  |
| C    | 1.270655  | 0.469946  | -0.545723 |
| O    | -1.007833 | 0.317361  | 2.163026  |
| O    | 3.537100  | 0.841145  | 2.199861  |
| C    | -1.222755 | 0.193430  | -0.539968 |
| C    | -2.020700 | 1.517466  | -0.684536 |
| O    | -3.413978 | 1.297359  | -0.533982 |
| C    | -3.895973 | 1.426669  | 0.803694  |
| C    | -1.810745 | 1.878865  | -2.169245 |
| C    | -1.719845 | 0.485087  | -2.814098 |
| O    | -2.812631 | 2.705952  | -2.699326 |
| O    | -0.983710 | -0.295202 | -1.843486 |
| C    | -1.017796 | 0.424562  | -4.154234 |
| N    | 2.658514  | 0.716310  | 6.820743  |
| C    | 2.654635  | 0.753436  | 5.448200  |
| N    | 1.446862  | 0.623744  | 4.948851  |
| C    | 0.611469  | 0.492695  | 6.044722  |
| C    | -0.785452 | 0.314206  | 6.179898  |
| N    | -1.627044 | 0.243783  | 5.130127  |
| N    | -1.291823 | 0.214485  | 7.426939  |
| C    | -0.453536 | 0.288869  | 8.471417  |
| N    | 0.874623  | 0.453052  | 8.477364  |
| C    | 1.349217  | 0.547712  | 7.230061  |

|   |           |           |           |
|---|-----------|-----------|-----------|
| H | 1.263399  | 0.599759  | 3.190087  |
| H | -1.791496 | -0.525508 | 0.055297  |
| H | -1.669279 | 2.288885  | 0.010133  |
| H | -4.960451 | 1.186261  | 0.774970  |
| H | -3.766330 | 2.455384  | 1.166961  |
| H | -3.374683 | 0.746256  | 1.483704  |
| H | -0.850471 | 2.395470  | -2.291469 |
| H | -2.737359 | 0.077468  | -2.899756 |
| H | -3.625591 | 2.448685  | -2.233289 |
| H | -1.578985 | 1.020818  | -4.879722 |
| H | -0.955577 | -0.603313 | -4.521425 |
| H | 3.546970  | 0.872551  | 4.848245  |
| H | -2.600350 | 0.079812  | 5.332159  |
| H | -0.923259 | 0.202061  | 9.449094  |
| H | -0.003176 | 0.831128  | -4.084795 |
| H | 3.459442  | 0.792953  | 7.429305  |
| H | -1.310048 | 0.272909  | 4.164895  |
| H | 3.382186  | 0.704944  | -0.488141 |
| H | 1.168666  | 0.380865  | -1.618606 |

**TABLE S40:** Cartesian coordinates of the modified base pair D:U W:WT

Calculated energy (in Hartrees) = -830.888059

| ATOM | X         | Y         | Z         |
|------|-----------|-----------|-----------|
| N    | -0.163983 | 0.204865  | -0.043949 |
| C    | -0.102043 | -0.161163 | 1.271593  |
| O    | 0.937282  | -0.077855 | 1.926399  |
| N    | -1.292269 | -0.618649 | 1.829561  |
| C    | -2.549442 | -0.594443 | 1.235117  |
| O    | -3.540314 | -0.991492 | 1.815700  |
| C    | -2.579642 | 0.003988  | -0.164621 |
| C    | -1.262869 | -0.213736 | -0.906932 |
| N    | 0.258565  | -1.610112 | 6.543899  |
| C    | 0.174246  | -1.247324 | 5.205736  |
| O    | -0.863402 | -1.429657 | 4.571105  |
| N    | 1.318327  | -0.691134 | 4.695851  |
| C    | 2.532403  | -0.463438 | 5.383273  |
| O    | 3.485814  | 0.039675  | 4.814386  |
| C    | 2.507469  | -0.882394 | 6.784769  |
| C    | 1.391489  | -1.431128 | 7.305391  |
| H    | -2.773357 | 1.078609  | -0.056672 |
| H    | -3.423789 | -0.435438 | -0.699046 |
| H    | -1.233024 | 0.383041  | -1.822066 |
| H    | -1.161996 | -1.270591 | -1.196354 |
| H    | 3.402170  | -0.737736 | 7.373847  |
| H    | 1.316823  | -1.759604 | 8.336008  |
| H    | -0.580717 | -2.017705 | 6.929034  |

|   |           |           |           |
|---|-----------|-----------|-----------|
| H | 0.742729  | 0.394041  | -0.446877 |
| H | -1.230419 | -0.932166 | 2.807591  |
| H | 1.276438  | -0.422275 | 3.701255  |

**TABLE S41:** Cartesian coordinates of the modified base pair m<sup>5</sup>C:G W:WT

Calculated energy (in Hartrees) = -976.851285

| ATOM | X         | Y         | Z         |
|------|-----------|-----------|-----------|
| N    | 0.091675  | -0.138782 | -0.120374 |
| C    | 0.080397  | -0.640131 | 1.171176  |
| N    | 1.280040  | -0.775647 | 1.673020  |
| C    | 2.128557  | -0.342272 | 0.668970  |
| C    | 3.568327  | -0.250827 | 0.635787  |
| O    | 4.396381  | -0.540993 | 1.485281  |
| N    | 3.993402  | 0.273737  | -0.625718 |
| C    | 3.179580  | 0.622420  | -1.670212 |
| N    | 3.789018  | 1.127828  | -2.785439 |
| N    | 1.861883  | 0.529114  | -1.643199 |
| C    | 1.408205  | 0.058997  | -0.456174 |
| N    | 8.735633  | 0.058957  | -2.250031 |
| C    | 7.352340  | 0.320942  | -2.282080 |
| O    | 6.816833  | 0.793605  | -1.282988 |
| N    | 6.699450  | 0.022623  | -3.447552 |
| C    | 7.358826  | -0.497967 | -4.472944 |
| N    | 6.642728  | -0.756634 | -5.594486 |
| C    | 8.779163  | -0.779683 | -4.464333 |
| C    | 9.414488  | -0.471397 | -3.300503 |
| C    | 9.490827  | -1.363365 | -5.653886 |
| H    | -0.845421 | -0.881614 | 1.675526  |
| H    | 3.164812  | 1.223894  | -3.571865 |
| H    | 5.641246  | -0.650383 | -5.545570 |
| H    | 10.477988 | -0.632944 | -3.157869 |
| H    | 9.101136  | -2.354523 | -5.920352 |
| H    | 10.557484 | -1.482831 | -5.447982 |
| H    | 9.398520  | -0.721917 | -6.539054 |
| H    | -0.699113 | 0.059631  | -0.713679 |
| H    | 4.746309  | 0.852319  | -2.990288 |
| H    | 9.196420  | 0.274076  | -1.375935 |
| H    | 7.034090  | -1.280169 | -6.358517 |
| H    | 5.001244  | 0.424782  | -0.721446 |

**TABLE S42:** Cartesian coordinates of the modified base pair  $\Psi$ :C S:WC

Calculated energy (in Hartrees) = -1230.802926

| ATOM | X          | Y         | Z         |
|------|------------|-----------|-----------|
| N    | 187.162514 | 95.929078 | 22.327165 |
| C    | 186.581000 | 96.631666 | 21.282166 |
| N    | 186.199213 | 95.797799 | 20.241219 |
| C    | 186.339255 | 94.403776 | 20.138102 |
| C    | 186.959491 | 93.769543 | 21.298519 |
| C    | 187.325505 | 94.563754 | 22.334072 |
| O    | 186.424961 | 97.839155 | 21.283179 |
| O    | 185.927125 | 93.838798 | 19.126754 |
| C    | 187.102954 | 92.259320 | 21.377975 |
| C    | 188.065881 | 91.616740 | 20.353823 |
| O    | 187.607526 | 90.312126 | 20.112684 |
| C    | 189.373056 | 91.595826 | 21.167075 |
| C    | 188.842051 | 91.169535 | 22.543278 |
| O    | 190.316539 | 90.719617 | 20.585941 |
| O    | 187.618435 | 91.919801 | 22.682099 |
| C    | 189.742712 | 91.458271 | 23.730270 |
| N    | 188.737369 | 89.834935 | 15.473336 |
| C    | 188.331151 | 90.101607 | 16.804038 |
| O    | 188.595983 | 89.265414 | 17.669389 |
| N    | 187.673575 | 91.269814 | 17.030337 |
| C    | 187.485322 | 92.139525 | 16.047304 |
| N    | 186.858095 | 93.291604 | 16.359417 |
| C    | 187.917038 | 91.897858 | 14.690682 |
| C    | 188.540125 | 90.714642 | 14.456505 |
| H    | 187.756071 | 94.130918 | 23.227794 |
| H    | 186.120034 | 91.794118 | 21.239562 |
| H    | 188.144006 | 92.195819 | 19.428246 |
| H    | 188.040842 | 89.957228 | 19.307823 |
| H    | 189.773217 | 92.622654 | 21.238899 |
| H    | 188.609582 | 90.098109 | 22.487796 |
| H    | 191.130378 | 90.772025 | 21.102836 |
| H    | 189.249216 | 91.194657 | 24.670310 |
| H    | 190.661626 | 90.864605 | 23.660412 |
| H    | 186.498647 | 93.417568 | 17.303712 |
| H    | 187.752904 | 92.615401 | 13.897080 |
| H    | 188.902633 | 90.418643 | 13.477991 |
| H    | 190.018160 | 92.518461 | 23.770074 |
| H    | 187.441514 | 96.490141 | 23.118955 |
| H    | 185.758370 | 96.258878 | 19.454856 |
| H    | 186.599379 | 93.946672 | 15.641361 |
| H    | 189.215372 | 88.956114 | 15.331343 |

**TABLE S43:** Cartesian coordinates of the modified base pair m<sup>7</sup>G:A S:WT  
 Calculated energy (in Hartrees) = -1470.653620

| ATOM | X         | Y         | Z         |
|------|-----------|-----------|-----------|
| C    | -3.440453 | -4.190354 | 0.283791  |
| C    | -2.191467 | -3.520744 | -0.245454 |
| O    | -2.562428 | -2.353568 | -1.047035 |
| C    | -1.236076 | -2.944132 | 0.802814  |
| O    | -0.470068 | -3.980135 | 1.359798  |
| C    | -0.455645 | -1.900919 | -0.031437 |
| O    | 0.481853  | -2.569431 | -0.825582 |
| C    | -1.589982 | -1.355505 | -0.939539 |
| N    | -2.280627 | -0.134579 | -0.387085 |
| C    | -3.594401 | -0.091665 | -0.081459 |
| N    | -3.947311 | 1.142267  | 0.274417  |
| C    | -2.818166 | 1.942319  | 0.187417  |
| C    | -2.633632 | 3.348581  | 0.420336  |
| O    | -3.447982 | 4.178607  | 0.781638  |
| N    | -1.280556 | 3.687770  | 0.157265  |
| C    | -0.281643 | 2.826848  | -0.259923 |
| N    | 0.937824  | 3.350567  | -0.450734 |
| N    | -0.496103 | 1.528990  | -0.469750 |
| C    | -1.762622 | 1.148805  | -0.236736 |
| C    | -5.286149 | 1.583348  | 0.688385  |
| N    | 5.212696  | 1.774230  | 0.413875  |
| C    | 5.941086  | 0.886115  | 1.185447  |
| N    | 5.481522  | -0.339191 | 1.135657  |
| C    | 4.405253  | -0.258787 | 0.275226  |
| C    | 3.470745  | -1.224610 | -0.157804 |
| N    | 3.466528  | -2.496243 | 0.272343  |
| N    | 2.522520  | -0.827183 | -1.040381 |
| C    | 2.468440  | 0.456178  | -1.419162 |
| N    | 3.244169  | 1.467258  | -1.024071 |
| C    | 4.214881  | 1.048370  | -0.186702 |
| H    | -3.151788 | -5.068079 | 0.868591  |
| H    | -4.010275 | -3.517656 | 0.934690  |
| H    | -1.623285 | -4.204198 | -0.885155 |
| H    | -1.825802 | -2.416054 | 1.570957  |
| H    | -0.007381 | -3.647872 | 2.139391  |
| H    | -0.004607 | -1.102699 | 0.573127  |
| H    | 1.170984  | -1.912226 | -1.113865 |
| H    | -1.202673 | -1.061471 | -1.919692 |
| H    | -5.586374 | 2.435040  | 0.078455  |
| H    | -5.262408 | 1.887343  | 1.735707  |
| H    | -5.981882 | 0.755938  | 0.552181  |
| H    | 6.798406  | 1.210131  | 1.759446  |

|   |           |           |           |
|---|-----------|-----------|-----------|
| H | 4.170118  | -2.805462 | 0.924449  |
| H | 1.670932  | 0.702329  | -2.113291 |
| H | 5.410219  | 2.753865  | 0.270048  |
| H | 2.711282  | -3.112732 | 0.002634  |
| H | 1.104705  | 4.336315  | -0.327446 |
| H | 1.734283  | 2.757849  | -0.705417 |
| H | -4.086348 | -4.520134 | -0.533892 |
| H | -1.075129 | 4.669846  | 0.305854  |
| H | -4.249613 | -0.944140 | -0.149273 |

**TABLE S44:** Cartesian coordinates of the modified base pair s<sup>4</sup>U:A W:ST  
 Calculated energy (in Hartrees) = -1626.151569

| ATOM | X         | Y         | Z         |
|------|-----------|-----------|-----------|
| N    | 63.080614 | 13.734277 | 18.858436 |
| C    | 64.288253 | 13.301401 | 19.400356 |
| N    | 65.404870 | 13.641771 | 18.658064 |
| C    | 65.456107 | 14.346207 | 17.460547 |
| C    | 64.162561 | 14.735258 | 16.973290 |
| C    | 63.039849 | 14.418311 | 17.667801 |
| O    | 64.354963 | 12.677800 | 20.451503 |
| S    | 66.914695 | 14.664153 | 16.722564 |
| C    | 61.852106 | 13.345362 | 19.612504 |
| C    | 61.689351 | 14.136441 | 20.934492 |
| O    | 61.095450 | 13.335587 | 21.932746 |
| C    | 60.646347 | 15.204198 | 20.551852 |
| C    | 59.777787 | 14.438806 | 19.538627 |
| O    | 59.937889 | 15.711753 | 21.653236 |
| O    | 60.728256 | 13.618953 | 18.810289 |
| C    | 58.992206 | 15.291278 | 18.564573 |
| N    | 63.764080 | 8.838648  | 26.072000 |
| C    | 62.590139 | 8.725055  | 26.789892 |
| N    | 61.627090 | 9.491233  | 26.338237 |
| C    | 62.201329 | 10.146075 | 25.263083 |
| C    | 61.699032 | 11.099202 | 24.353072 |
| N    | 60.436770 | 11.574166 | 24.416326 |
| N    | 62.529194 | 11.552322 | 23.389836 |
| C    | 63.793650 | 11.081729 | 23.324283 |
| N    | 64.372846 | 10.188704 | 24.123935 |
| C    | 63.531463 | 9.757246  | 25.074075 |
| H    | 64.101210 | 15.275948 | 16.039832 |
| H    | 62.042582 | 14.665800 | 17.330457 |
| H    | 61.940560 | 12.275311 | 19.821922 |
| H    | 62.640264 | 14.560136 | 21.272299 |
| H    | 61.776380 | 12.739820 | 22.360083 |
| H    | 61.136873 | 16.045705 | 20.045763 |
| H    | 59.102843 | 13.776279 | 20.097300 |

|   |           |           |           |
|---|-----------|-----------|-----------|
| H | 59.939770 | 14.986463 | 22.300454 |
| H | 58.276355 | 15.903512 | 19.121113 |
| H | 58.440107 | 14.672480 | 17.851845 |
| H | 62.509812 | 8.057775  | 27.637334 |
| H | 59.798278 | 11.185601 | 25.090758 |
| H | 64.390909 | 11.486373 | 22.512729 |
| H | 60.099345 | 12.194759 | 23.695452 |
| H | 64.631943 | 8.349496  | 26.232715 |
| H | 59.655304 | 15.960006 | 18.005266 |
| H | 66.287055 | 13.334090 | 19.051445 |

**TABLE S45:** Cartesian coordinates of the modified base pair D:G W:ST  
 Calculated energy (in Hartrees) = -1379.642970

| ATOM | X         | Y         | Z         |
|------|-----------|-----------|-----------|
| C    | 72.648727 | 61.556358 | 35.225777 |
| C    | 72.084038 | 60.181582 | 35.519633 |
| O    | 72.860897 | 59.181641 | 34.825300 |
| C    | 72.139570 | 59.743637 | 36.994342 |
| O    | 71.124679 | 60.281069 | 37.805103 |
| C    | 72.088694 | 58.211346 | 36.865808 |
| O    | 70.707921 | 57.872975 | 36.757862 |
| C    | 72.841516 | 57.958216 | 35.536904 |
| N    | 74.232202 | 57.542589 | 35.768142 |
| C    | 75.388747 | 58.241408 | 35.447865 |
| N    | 76.483590 | 57.602799 | 35.773116 |
| C    | 76.041468 | 56.423308 | 36.333741 |
| C    | 76.789645 | 55.330897 | 36.894926 |
| O    | 77.988127 | 55.144500 | 37.006307 |
| N    | 75.879731 | 54.333953 | 37.394490 |
| C    | 74.510794 | 54.364760 | 37.352835 |
| N    | 73.844897 | 53.290441 | 37.857690 |
| N    | 73.836089 | 55.368717 | 36.812584 |
| C    | 74.647156 | 56.361200 | 36.333054 |
| N    | 69.065170 | 53.567379 | 37.011195 |
| C    | 70.362168 | 53.918234 | 37.223950 |
| O    | 70.992729 | 53.585392 | 38.225957 |
| N    | 70.947043 | 54.701161 | 36.215528 |
| C    | 70.452511 | 54.845904 | 34.914857 |
| O    | 71.088747 | 55.426139 | 34.057814 |
| C    | 69.093503 | 54.212474 | 34.670414 |
| C    | 68.257071 | 54.154061 | 35.947761 |
| H    | 72.064282 | 62.309398 | 35.762994 |
| H    | 72.605477 | 61.779308 | 34.156216 |
| H    | 71.039080 | 60.120078 | 35.181244 |
| H    | 73.103157 | 60.042682 | 37.423295 |
| H    | 70.354845 | 59.705337 | 37.671090 |

|   |           |           |           |
|---|-----------|-----------|-----------|
| H | 72.557011 | 57.689219 | 37.705364 |
| H | 70.628530 | 56.911725 | 36.831924 |
| H | 72.348861 | 57.181055 | 34.942747 |
| H | 75.331268 | 59.203442 | 34.964332 |
| H | 74.341301 | 52.675829 | 38.484029 |
| H | 69.269815 | 53.197975 | 34.291519 |
| H | 67.910570 | 55.160894 | 36.223040 |
| H | 67.372504 | 53.530458 | 35.800304 |
| H | 68.594571 | 54.780358 | 33.883126 |
| H | 71.944251 | 54.946426 | 36.366353 |
| H | 72.848741 | 53.412588 | 38.052690 |
| H | 76.352973 | 53.532237 | 37.792861 |
| H | 73.691227 | 61.625442 | 35.553131 |
| H | 68.626037 | 53.102172 | 37.792283 |

**TABLE S46:** Cartesian coordinates of the modified base pair D:G H:SC

Calculated energy (in Hartrees) =  $-958.61992759$

| ATOM | X         | Y         | Z         |
|------|-----------|-----------|-----------|
| N    | 0.000000  | 0.000000  | 0.000000  |
| C    | 0.000000  | 0.000000  | 1.385860  |
| N    | 1.204583  | 0.000000  | 1.892621  |
| C    | 2.043331  | 0.005086  | 0.793548  |
| C    | 3.481039  | 0.011044  | 0.719161  |
| O    | 4.333214  | 0.002207  | 1.590171  |
| N    | 3.888349  | 0.030170  | -0.659935 |
| C    | 3.072276  | 0.030498  | -1.765106 |
| N    | 3.676219  | -0.003108 | -2.987989 |
| N    | 1.754877  | 0.014954  | -1.679268 |
| C    | 1.313115  | 0.005451  | -0.395514 |
| N    | -1.720787 | -1.203879 | -5.141076 |
| C    | -1.650363 | 0.088202  | -5.589374 |
| O    | -2.609915 | 0.784235  | -5.866226 |
| N    | -0.334924 | 0.594813  | -5.685258 |
| C    | 0.823318  | 0.018395  | -5.209182 |
| O    | 1.886555  | 0.626521  | -5.239568 |
| C    | 0.657593  | -1.368574 | -4.625677 |
| C    | -0.564346 | -2.095825 | -5.185707 |
| H    | -0.922115 | -0.000970 | 1.950691  |
| H    | 3.084574  | 0.222156  | -3.789211 |
| H    | 1.575704  | -1.927969 | -4.818592 |
| H    | 0.587111  | -1.230530 | -3.538984 |
| H    | -0.365948 | -2.437243 | -6.212609 |
| H    | -0.785823 | -2.979718 | -4.582855 |
| H    | -2.646986 | -1.598953 | -5.225571 |
| H    | -0.799460 | 0.026454  | -0.614556 |



|   |           |          |           |
|---|-----------|----------|-----------|
| H | 4.629697  | 0.320135 | -3.052188 |
| H | -0.274631 | 1.556753 | -5.997899 |
| H | 4.894216  | 0.007218 | -0.774779 |

**TABLE S47:** Cartesian coordinates of the modified base pair Um:G H:SC

Calculated energy (in Hartrees) = -1878.046729

| ATOM | X         | Y         | Z         |
|------|-----------|-----------|-----------|
| C    | 0.410266  | -4.541402 | 0.624287  |
| C    | -0.055426 | -3.238381 | -0.019417 |
| O    | 0.644524  | -2.111415 | 0.572217  |
| C    | 0.223675  | -3.146557 | -1.526520 |
| O    | -0.653283 | -2.246411 | -2.197250 |
| C    | 1.606293  | -2.475638 | -1.570963 |
| O    | 1.917120  | -1.876527 | -2.796760 |
| C    | 1.512140  | -1.490782 | -0.377109 |
| N    | 2.785586  | -1.190053 | 0.243116  |
| C    | 3.634504  | -2.064188 | 0.914764  |
| N    | 4.764146  | -1.515775 | 1.274904  |
| C    | 4.677661  | -0.213252 | 0.819617  |
| C    | 5.626957  | 0.866346  | 0.896913  |
| O    | 6.746481  | 0.920715  | 1.376857  |
| N    | 5.076894  | 2.037421  | 0.268903  |
| C    | 3.834909  | 2.158197  | -0.307003 |
| N    | 3.508149  | 3.361794  | -0.854471 |
| N    | 2.980410  | 1.154594  | -0.369214 |
| C    | 3.457845  | 0.012352  | 0.183631  |
| N    | -2.363976 | 2.060024  | 0.518257  |
| C    | -2.681133 | 3.039715  | -0.421508 |
| N    | -1.581506 | 3.691487  | -0.953175 |
| C    | -0.222916 | 3.436751  | -0.701213 |
| C    | -0.004149 | 2.407476  | 0.291430  |
| C    | -1.059738 | 1.774305  | 0.849793  |
| O    | -3.832172 | 3.291009  | -0.752395 |
| O    | 0.639399  | 4.073707  | -1.305372 |
| C    | -3.505604 | 1.282879  | 1.073481  |
| C    | -3.971759 | 0.178506  | 0.094325  |
| O    | -5.357817 | -0.085972 | 0.228287  |
| C    | -6.193014 | 0.727885  | -0.596755 |
| C    | -3.243436 | -1.060988 | 0.642202  |
| C    | -3.265608 | -0.794082 | 2.156977  |
| O    | -3.828025 | -2.282428 | 0.254240  |
| O    | -3.088626 | 0.642704  | 2.256161  |
| C    | -2.195376 | -1.499542 | 2.965862  |
| H    | -0.215767 | -5.377735 | 0.295785  |
| H    | 1.449884  | -4.772875 | 0.369978  |
| H    | -1.123392 | -3.098029 | 0.177466  |

|   |           |           |           |
|---|-----------|-----------|-----------|
| H | 0.210302  | -4.127957 | -2.019831 |
| H | 2.386527  | -3.214467 | -1.360790 |
| H | 1.081899  | -1.503337 | -3.121887 |
| H | 1.106324  | -0.532337 | -0.717480 |
| H | 3.335522  | -3.080443 | 1.127708  |
| H | 2.528380  | 3.510770  | -1.101772 |
| H | -4.304233 | 2.000359  | 1.274621  |
| H | -3.718179 | 0.415343  | -0.945300 |
| H | -7.223873 | 0.479502  | -0.338202 |
| H | -6.021823 | 0.510584  | -1.659863 |
| H | -6.012078 | 1.794056  | -0.426706 |
| H | -2.206893 | -1.066224 | 0.287461  |
| H | -4.263090 | -1.047116 | 2.542234  |
| H | -4.784003 | -2.110452 | 0.219292  |
| H | -2.392333 | -2.576122 | 2.956740  |
| H | -2.206064 | -1.159285 | 4.004832  |
| H | 1.010963  | 2.123154  | 0.529742  |
| H | -1.791824 | 4.400563  | -1.645684 |
| H | -0.948013 | 1.008110  | 1.604413  |
| H | -1.197943 | -1.332089 | 2.546336  |
| H | 4.003875  | 4.181642  | -0.540187 |
| H | 5.721749  | 2.817989  | 0.252000  |
| H | 0.337322  | -4.465142 | 1.712105  |
| C | -1.888016 | -2.815983 | -2.620908 |
| H | -2.543933 | -3.049422 | -1.774000 |
| H | -2.377671 | -2.067358 | -3.248105 |
| H | -1.718792 | -3.722881 | -3.218348 |

**TABLE S48:** Cartesian coordinates of the modified base pair Gm:G S:SC  
 Calculated energy (in Hartrees) = -1966.483286

| ATOM | X         | Y         | Z         |
|------|-----------|-----------|-----------|
| C    | -0.397878 | -4.659359 | -0.047189 |
| C    | -0.356863 | -3.287213 | 0.590260  |
| O    | -0.730688 | -2.276254 | -0.397824 |
| C    | -1.331430 | -3.050555 | 1.756040  |
| O    | -0.886152 | -3.549553 | 2.988781  |
| C    | -1.490642 | -1.517832 | 1.723791  |
| O    | -0.353097 | -0.995440 | 2.391943  |
| C    | -0.515607 | 0.326571  | 2.905028  |
| C    | -1.444118 | -1.204709 | 0.210699  |
| N    | -2.774909 | -1.130970 | -0.394197 |
| C    | -3.534349 | -2.161479 | -0.938024 |
| N    | -4.739409 | -1.787248 | -1.282947 |
| C    | -4.796851 | -0.450202 | -0.950003 |
| C    | -5.876679 | 0.495929  | -1.072608 |
| O    | -7.005606 | 0.380341  | -1.508360 |

|   |           |           |           |
|---|-----------|-----------|-----------|
| N | -5.452142 | 1.777965  | -0.558613 |
| C | -4.220244 | 2.089510  | -0.054338 |
| N | -3.992094 | 3.396006  | 0.304066  |
| N | -3.240946 | 1.213881  | 0.046722  |
| C | -3.587322 | -0.023696 | -0.405859 |
| C | 6.025152  | -2.185737 | -0.285538 |
| C | 4.521489  | -2.107754 | -0.457413 |
| O | 3.938969  | -1.317983 | 0.612620  |
| C | 4.032103  | -1.431421 | -1.753661 |
| O | 4.041627  | -2.269794 | -2.880682 |
| C | 2.622643  | -0.974004 | -1.334422 |
| O | 1.822817  | -2.139644 | -1.433569 |
| C | 2.853322  | -0.552783 | 0.134369  |
| N | 3.205487  | 0.874866  | 0.243693  |
| C | 4.475388  | 1.410227  | 0.406067  |
| N | 4.493209  | 2.719402  | 0.393926  |
| C | 3.175998  | 3.078233  | 0.213899  |
| C | 2.583081  | 4.386436  | 0.108012  |
| O | 3.072616  | 5.500317  | 0.157312  |
| N | 1.163819  | 4.250054  | -0.077286 |
| C | 0.450666  | 3.081200  | -0.129012 |
| N | -0.921833 | 3.213593  | -0.215931 |
| N | 1.002036  | 1.891439  | -0.043805 |
| C | 2.356711  | 1.950560  | 0.129286  |
| H | -0.123449 | -5.406866 | 0.703199  |
| H | 0.311842  | -4.724018 | -0.875910 |
| H | 0.660829  | -3.063566 | 0.931780  |
| H | -2.294554 | -3.525342 | 1.536665  |
| H | -0.251597 | -2.893583 | 3.320754  |
| H | -2.417500 | -1.162008 | 2.188419  |
| H | -0.687030 | 1.051875  | 2.103146  |
| H | -1.348624 | 0.365822  | 3.619591  |
| H | 0.414035  | 0.576875  | 3.418535  |
| H | -0.934309 | -0.255501 | 0.020337  |
| H | -3.115898 | -3.146219 | -1.077194 |
| H | -3.138042 | 3.534190  | 0.830541  |
| H | 6.288826  | -2.635211 | 0.675775  |
| H | 6.444820  | -2.804467 | -1.084650 |
| H | 4.087264  | -3.115674 | -0.416188 |
| H | 4.659701  | -0.562381 | -1.981508 |
| H | 3.227726  | -2.795550 | -2.813063 |
| H | 2.223965  | -0.150590 | -1.937431 |
| H | 0.882908  | -1.949207 | -1.255573 |
| H | 1.964382  | -0.721407 | 0.752042  |
| H | 5.328487  | 0.767869  | 0.554648  |
| H | -1.423511 | 2.333296  | -0.321505 |

|   |           |           |           |
|---|-----------|-----------|-----------|
| H | 6.485355  | -1.193938 | -0.342837 |
| H | -1.399091 | -4.896376 | -0.421108 |
| H | 0.672786  | 5.135792  | -0.084019 |
| H | -1.254819 | 3.930624  | -0.848793 |
| H | -4.779511 | 3.947769  | 0.612404  |
| H | -6.158838 | 2.497425  | -0.655510 |

**TABLE S49:** Cartesian coordinates of the modified base pair s<sup>4</sup>U:A S:SC  
 Calculated energy (in Hartrees) = -2047.169603

| ATOM | X         | Y         | Z         |
|------|-----------|-----------|-----------|
| N    | -3.655872 | -0.616955 | -0.436072 |
| C    | -3.729568 | 0.756181  | -0.666144 |
| N    | -4.902116 | 1.347758  | -0.230477 |
| C    | -5.989004 | 0.742610  | 0.389855  |
| C    | -5.830135 | -0.674916 | 0.562007  |
| C    | -4.697760 | -1.297367 | 0.147024  |
| O    | -2.827828 | 1.383633  | -1.203711 |
| S    | -7.312636 | 1.638433  | 0.855288  |
| C    | -2.414950 | -1.287120 | -0.917264 |
| C    | -1.176556 | -0.989650 | -0.028996 |
| O    | -0.028432 | -0.885240 | -0.837968 |
| C    | -1.111890 | -2.258114 | 0.837955  |
| C    | -1.568658 | -3.337606 | -0.156121 |
| O    | 0.186611  | -2.431884 | 1.360104  |
| O    | -2.624168 | -2.682855 | -0.898778 |
| C    | -2.106131 | -4.623562 | 0.440946  |
| C    | 6.419810  | -1.775032 | 1.008456  |
| C    | 4.958573  | -1.823989 | 0.613407  |
| O    | 4.222692  | -0.824410 | 1.358988  |
| C    | 4.656541  | -1.495219 | -0.860079 |
| O    | 4.874664  | -2.562734 | -1.746796 |
| C    | 3.182994  | -1.054977 | -0.782217 |
| O    | 2.419967  | -2.240997 | -0.823941 |
| C    | 3.106510  | -0.384597 | 0.612642  |
| N    | 3.166712  | 1.086063  | 0.536253  |
| C    | 4.201483  | 1.912270  | 0.941096  |
| N    | 3.956229  | 3.190969  | 0.772330  |
| C    | 2.686580  | 3.216161  | 0.229711  |
| C    | 1.847240  | 4.274539  | -0.177486 |
| N    | 2.224827  | 5.565874  | -0.086339 |
| N    | 0.626153  | 3.988976  | -0.673096 |
| C    | 0.256183  | 2.708589  | -0.767279 |
| N    | 0.961086  | 1.616836  | -0.422125 |
| C    | 2.175174  | 1.924145  | 0.077403  |
| H    | -6.633921 | -1.234705 | 1.018132  |

|   |           |           |           |
|---|-----------|-----------|-----------|
| H | -4.544016 | -2.364608 | 0.229153  |
| H | -2.228931 | -0.922946 | -1.930363 |
| H | -1.315848 | -0.082753 | 0.565431  |
| H | 0.327612  | 0.047013  | -0.751369 |
| H | -1.861873 | -2.175953 | 1.641401  |
| H | -0.735429 | -3.555101 | -0.837974 |
| H | 0.173427  | -3.161359 | 1.992577  |
| H | -2.492528 | -5.282730 | -0.340794 |
| H | -1.304952 | -5.158834 | 0.962023  |
| H | 6.849182  | -0.791239 | 0.791290  |
| H | 6.549918  | -1.983148 | 2.074122  |
| H | 4.534568  | -2.813177 | 0.835079  |
| H | 5.284691  | -0.654960 | -1.180888 |
| H | 4.049320  | -3.076024 | -1.729797 |
| H | 2.897951  | -0.357566 | -1.579810 |
| H | 1.475481  | -1.984899 | -0.775797 |
| H | 2.170774  | -0.655653 | 1.113640  |
| H | 5.099062  | 1.492091  | 1.367026  |
| H | 1.587395  | 6.284914  | -0.387151 |
| H | -0.738429 | 2.521405  | -1.162572 |
| H | 3.130502  | 5.802505  | 0.283686  |
| H | -2.911939 | -4.422335 | 1.154946  |
| H | 6.971535  | -2.527293 | 0.436734  |
| H | -4.957195 | 2.347593  | -0.389332 |

**TABLE S50:** Cartesian coordinates of the modified base pair m<sup>6</sup>A:G S:ST  
 Calculated energy (in Hartrees) = -1910.701748

| ATOM | X         | Y         | Z         |
|------|-----------|-----------|-----------|
| C    | 7.096692  | 0.770065  | 0.580267  |
| C    | 5.775000  | 0.944670  | -0.141211 |
| O    | 5.372395  | -0.313330 | -0.721500 |
| C    | 4.584622  | 1.366874  | 0.738791  |
| O    | 4.518749  | 2.754954  | 0.979614  |
| C    | 3.387445  | 0.855552  | -0.093630 |
| O    | 3.096659  | 1.844729  | -1.070798 |
| C    | 3.960044  | -0.412281 | -0.770483 |
| N    | 3.578697  | -1.660017 | -0.099743 |
| C    | 4.380695  | -2.484578 | 0.680329  |
| N    | 3.771642  | -3.571863 | 1.079176  |
| C    | 2.505466  | -3.477406 | 0.536829  |
| C    | 1.391892  | -4.385694 | 0.609284  |
| O    | 1.263575  | -5.462472 | 1.168811  |
| N    | 0.287043  | -3.849815 | -0.136579 |
| C    | 0.249445  | -2.657340 | -0.817803 |
| N    | -0.906021 | -2.353664 | -1.481426 |
| N    | 1.280756  | -1.836239 | -0.877897 |

|   |           |           |           |
|---|-----------|-----------|-----------|
| C | 2.364902  | -2.300190 | -0.200610 |
| C | -7.425712 | -0.014532 | 0.733766  |
| C | -6.237717 | -0.680905 | 0.068454  |
| O | -5.583514 | 0.274819  | -0.803697 |
| C | -4.193214 | 0.020303  | -0.865519 |
| N | -3.470085 | 1.219184  | -0.436797 |
| C | -2.136187 | 1.463146  | -0.677430 |
| N | -1.296373 | 0.695944  | -1.391846 |
| C | -0.067542 | 1.207688  | -1.407217 |
| N | 0.365129  | 2.329292  | -0.811920 |
| C | -0.492065 | 3.113054  | -0.102289 |
| N | 0.004335  | 4.238621  | 0.456044  |
| C | -1.845661 | 2.666533  | -0.021607 |
| N | -2.986250 | 3.157202  | 0.596396  |
| C | -3.919252 | 2.276048  | 0.330876  |
| C | -0.760322 | 5.088632  | 1.365949  |
| C | 1.417065  | 4.577253  | 0.286331  |
| C | -3.917078 | -1.202548 | 0.041252  |
| O | -3.867063 | -2.419451 | -0.707778 |
| C | -5.112240 | -1.167115 | 1.009250  |
| N | -5.272008 | -2.411729 | 1.725650  |
| H | 7.878868  | 0.435501  | -0.106731 |
| H | 7.401070  | 1.726876  | 1.015492  |
| H | 5.881912  | 1.688190  | -0.945620 |
| H | 4.633532  | 0.860005  | 1.708808  |
| H | 4.175362  | 3.109257  | 0.140140  |
| H | 2.505764  | 0.622034  | 0.509512  |
| H | 2.160436  | 2.135415  | -0.957414 |
| H | 3.605221  | -0.466364 | -1.805364 |
| H | 5.405992  | -2.220772 | 0.885132  |
| H | -1.016420 | -1.365858 | -1.703117 |
| H | -8.127076 | 0.369420  | -0.011499 |
| H | -7.959252 | -0.737899 | 1.359146  |
| H | -6.592084 | -1.529672 | -0.541502 |
| H | -3.875726 | -0.186124 | -1.894852 |
| H | 0.688987  | 0.633946  | -1.933517 |
| H | -4.951846 | 2.344158  | 0.636437  |
| H | -0.715787 | 6.127585  | 1.021428  |
| H | -1.799458 | 4.770182  | 1.404084  |
| H | -0.332111 | 5.042386  | 2.375050  |
| H | 1.707828  | 4.492393  | -0.762438 |
| H | 1.555590  | 5.610479  | 0.608819  |
| H | 2.072996  | 3.932715  | 0.882812  |
| H | -2.954471 | -1.133060 | 0.547770  |
| H | -4.566141 | -2.420731 | -1.376154 |
| H | -4.925760 | -0.365307 | 1.737698  |

|   |           |           |           |
|---|-----------|-----------|-----------|
| H | -6.118778 | -2.421023 | 2.285052  |
| H | -5.292706 | -3.195650 | 1.080571  |
| H | -7.101842 | 0.817293  | 1.367572  |
| H | 7.006170  | 0.034679  | 1.386427  |
| H | -1.769460 | -2.788373 | -1.179175 |
| H | -0.522940 | -4.457455 | -0.140645 |

**TABLE S51:** Cartesian coordinates of the modified base pair Am:G S:ST

Calculated energy (in Hartrees) = -1891.250622

| ATOM | X         | Y         | Z         |
|------|-----------|-----------|-----------|
| C    | 7.872976  | -0.226560 | -1.042719 |
| C    | 6.624312  | 0.640860  | -1.102449 |
| O    | 5.477948  | -0.213081 | -1.369392 |
| C    | 6.296023  | 1.401433  | 0.191879  |
| O    | 5.791582  | 2.678437  | -0.155077 |
| C    | 5.181608  | 0.551922  | 0.827510  |
| O    | 4.427945  | 1.378727  | 1.681067  |
| C    | 4.449252  | 0.028816  | -0.434195 |
| C    | 3.576783  | 0.719971  | 2.614952  |
| N    | 3.715184  | -1.216900 | -0.265923 |
| C    | 4.244434  | -2.498553 | -0.239451 |
| N    | 3.342991  | -3.439953 | -0.100541 |
| C    | 2.148089  | -2.749284 | -0.035170 |
| C    | 0.813406  | -3.182766 | 0.108369  |
| N    | 0.483694  | -4.483656 | 0.231662  |
| N    | -0.158796 | -2.246374 | 0.139931  |
| C    | 0.176424  | -0.949387 | 0.021797  |
| N    | 1.396631  | -0.423074 | -0.116220 |
| C    | 2.351017  | -1.369847 | -0.144506 |
| C    | -7.254411 | -1.928655 | -0.534775 |
| C    | -5.740668 | -2.002137 | -0.531636 |
| O    | -5.197364 | -0.916402 | -1.319173 |
| C    | -5.069673 | -1.852746 | 0.846903  |
| O    | -5.056577 | -3.030636 | 1.613431  |
| C    | -3.660226 | -1.379013 | 0.439894  |
| O    | -2.963426 | -2.553977 | 0.065643  |
| C    | -3.965018 | -0.477119 | -0.782062 |
| N    | -4.102442 | 0.946677  | -0.434795 |
| C    | -5.279626 | 1.658096  | -0.236684 |
| N    | -5.084005 | 2.927029  | 0.016648  |
| C    | -3.712926 | 3.077798  | -0.018620 |
| C    | -2.901323 | 4.253382  | 0.156547  |
| O    | -3.198057 | 5.411390  | 0.394521  |
| N    | -1.512492 | 3.908217  | -0.002767 |
| C    | -0.997931 | 2.663898  | -0.267240 |
| N    | 0.359755  | 2.570076  | -0.412960 |

|   |           |           |           |
|---|-----------|-----------|-----------|
| N | -1.756916 | 1.597670  | -0.417085 |
| C | -3.086520 | 1.863518  | -0.299983 |
| H | 8.768607  | 0.398199  | -0.970102 |
| H | 7.951010  | -0.833936 | -1.948125 |
| H | 6.701497  | 1.369307  | -1.916781 |
| H | 7.169788  | 1.483647  | 0.854073  |
| H | 5.283784  | 2.986142  | 0.611604  |
| H | 5.605420  | -0.303313 | 1.375972  |
| H | 3.728408  | 0.781031  | -0.777681 |
| H | 3.259623  | 1.478150  | 3.333844  |
| H | 4.114720  | -0.073771 | 3.150637  |
| H | 2.690787  | 0.296521  | 2.129663  |
| H | 5.305390  | -2.659076 | -0.359582 |
| H | -0.487508 | -4.751098 | 0.250993  |
| H | -0.648977 | -0.241417 | 0.018394  |
| H | -7.604468 | -0.992601 | -0.087061 |
| H | -7.656222 | -2.761599 | 0.050308  |
| H | -5.407932 | -2.953896 | -0.968654 |
| H | -5.582010 | -1.076525 | 1.427481  |
| H | -4.288043 | -3.522138 | 1.275496  |
| H | -3.139902 | -0.825374 | 1.229839  |
| H | -1.987067 | -2.425299 | 0.122865  |
| H | -3.165363 | -0.553580 | -1.526669 |
| H | -6.238835 | 1.173373  | -0.326080 |
| H | 0.929465  | 3.270392  | 0.036907  |
| H | -7.650301 | -1.994629 | -1.551940 |
| H | 7.851280  | -0.900592 | -0.179459 |
| H | 1.196562  | -5.187895 | 0.129758  |
| H | 0.759760  | 1.633988  | -0.421720 |
| H | -0.897115 | 4.710559  | 0.052028  |

**TABLE S52:** Cartesian coordinates of the modified base pair m<sup>7</sup>G:A S:ST  
Calculated energy (in Hartrees) = -1892.438401

| ATOM | X         | Y         | Z         |
|------|-----------|-----------|-----------|
| C    | -5.805286 | -3.464739 | 1.183389  |
| C    | -4.717594 | -3.026643 | 0.213814  |
| O    | -4.928554 | -1.622876 | -0.103002 |
| C    | -3.275408 | -3.133034 | 0.750239  |
| O    | -2.437673 | -3.593682 | -0.294020 |
| C    | -2.951164 | -1.675327 | 1.112798  |
| O    | -1.560224 | -1.489910 | 1.203952  |
| C    | -3.697666 | -0.934176 | -0.013064 |
| N    | -3.982565 | 0.462819  | 0.291878  |
| C    | -5.251659 | 1.083001  | -0.141308 |
| N    | -4.995962 | 2.524524  | 0.022270  |
| C    | -3.586644 | 2.652788  | -0.083478 |



|   |           |           |           |
|---|-----------|-----------|-----------|
| C | -2.774189 | 3.806960  | -0.218109 |
| O | -3.073624 | 4.993358  | -0.358849 |
| N | -1.380445 | 3.438986  | -0.210043 |
| C | -0.878385 | 2.181309  | -0.059081 |
| N | 0.468869  | 2.007625  | -0.051705 |
| N | -1.674705 | 1.133337  | 0.116042  |
| C | -3.001804 | 1.418184  | 0.098774  |
| C | -5.828841 | 3.388712  | -0.801631 |
| C | 5.579639  | 0.297882  | 2.319275  |
| C | 5.887527  | 1.285445  | 1.197666  |
| O | 5.959828  | 0.664086  | -0.116378 |
| C | 4.828426  | 2.361269  | 0.976658  |
| O | 5.363170  | 3.487883  | 0.276819  |
| C | 3.784487  | 1.645771  | 0.068947  |
| O | 3.185632  | 2.554352  | -0.829430 |
| C | 4.650211  | 0.567674  | -0.654258 |
| N | 4.174083  | -0.818705 | -0.488852 |
| C | 5.022132  | -1.919883 | -0.433915 |
| N | 4.405383  | -3.072463 | -0.491405 |
| C | 3.073768  | -2.728379 | -0.620501 |
| C | 1.911319  | -3.518072 | -0.744565 |
| N | 1.957268  | -4.865892 | -0.724812 |
| N | 0.717160  | -2.911788 | -0.888289 |
| C | 0.694621  | -1.570769 | -0.899156 |
| N | 1.715624  | -0.711716 | -0.765880 |
| C | 2.896352  | -1.342161 | -0.634176 |
| H | -5.754568 | -4.545286 | 1.352298  |
| H | -5.703589 | -2.955893 | 2.147200  |
| H | -4.776842 | -3.603593 | -0.716652 |
| H | -3.216227 | -3.793983 | 1.628341  |
| H | -1.530539 | -3.290402 | -0.110601 |
| H | -3.457608 | -1.404683 | 2.052562  |
| H | -1.379607 | -0.557348 | 0.954240  |
| H | -3.132406 | -1.016033 | -0.958260 |
| H | -5.472109 | 0.827407  | -1.200825 |
| H | 1.076206  | 2.711804  | -0.450136 |
| H | -6.869908 | 3.316160  | -0.470862 |
| H | -5.785681 | 3.123392  | -1.873745 |
| H | -5.486684 | 4.417471  | -0.683259 |
| H | 6.306994  | -0.517531 | 2.310665  |
| H | 5.647350  | 0.805313  | 3.286879  |
| H | 6.870706  | 1.737392  | 1.361687  |
| H | 4.387669  | 2.749841  | 1.896775  |
| H | 6.036732  | 3.154236  | -0.336244 |
| H | 2.999289  | 1.174236  | 0.663152  |
| H | 3.782268  | 3.326002  | -0.841156 |

|   |           |           |           |
|---|-----------|-----------|-----------|
| H | 4.703708  | 0.792171  | -1.724127 |
| H | 6.088181  | -1.780014 | -0.342067 |
| H | 1.102029  | -5.386330 | -0.835677 |
| H | -0.286525 | -1.123153 | -1.010448 |
| H | -6.791738 | -3.226624 | 0.775781  |
| H | 4.580640  | -0.136463 | 2.230623  |
| H | 2.839386  | -5.340965 | -0.629591 |
| H | 0.806341  | 1.062149  | -0.237831 |
| H | -0.757093 | 4.228720  | -0.321568 |
| H | -6.086824 | 0.744358  | 0.475783  |

**TABLE S53:** Cartesian coordinates of the modified base pair D:U S:ST  
 Calculated energy (in Hartrees) = -1672.908753

| ATOM | X         | Y         | Z         |
|------|-----------|-----------|-----------|
| C    | 6.145000  | 2.263000  | -0.552000 |
| C    | 4.647000  | 2.106000  | -0.694000 |
| O    | 4.338000  | 0.736000  | -1.031000 |
| C    | 3.823000  | 2.351000  | 0.581000  |
| O    | 3.617000  | 3.706000  | 0.888000  |
| C    | 2.985000  | 0.478000  | -0.711000 |
| C    | 2.515000  | 1.586000  | 0.276000  |
| O    | 1.654000  | 2.509000  | -0.358000 |
| N    | 2.907000  | -0.892000 | -0.149000 |
| C    | 1.646000  | -1.341000 | 0.090000  |
| O    | 0.657000  | -0.597000 | 0.032000  |
| N    | 1.490000  | -2.686000 | 0.411000  |
| C    | 2.499000  | -3.605000 | 0.672000  |
| O    | 2.252000  | -4.767000 | 0.932000  |
| C    | 3.889000  | -2.998000 | 0.631000  |
| C    | 3.983000  | -1.863000 | -0.388000 |
| C    | -5.056000 | -3.068000 | -0.735000 |
| C    | -3.637000 | -2.579000 | -0.992000 |
| O    | -3.675000 | -1.156000 | -1.273000 |
| C    | -2.659000 | -2.771000 | 0.191000  |
| O    | -1.349000 | -3.131000 | -0.253000 |
| C    | -2.588000 | -1.352000 | 0.796000  |
| O    | -1.509000 | -1.062000 | 1.619000  |
| C    | -2.719000 | -0.481000 | -0.473000 |
| N    | -3.202000 | 0.880000  | -0.217000 |
| C    | -2.287000 | 1.934000  | -0.273000 |
| O    | -1.114000 | 1.785000  | -0.595000 |
| N    | -2.818000 | 3.161000  | 0.060000  |
| C    | -4.145000 | 3.478000  | 0.433000  |
| O    | -4.451000 | 4.627000  | 0.700000  |
| C    | -5.016000 | 2.313000  | 0.440000  |
| C    | -4.522000 | 1.097000  | 0.124000  |

|   |           |           |           |
|---|-----------|-----------|-----------|
| H | 6.660000  | 2.044000  | -1.492000 |
| H | 6.532000  | 1.590000  | 0.221000  |
| H | 4.264000  | 2.770000  | -1.484000 |
| H | 4.338000  | 1.880000  | 1.428000  |
| H | 2.358000  | 0.526000  | -1.612000 |
| H | 2.058000  | 1.159000  | 1.172000  |
| H | 0.744000  | 2.161000  | -0.379000 |
| H | 4.602000  | -3.793000 | 0.406000  |
| H | 4.116000  | -2.620000 | 1.636000  |
| H | 3.917000  | -2.262000 | -1.410000 |
| H | 4.931000  | -1.335000 | -0.303000 |
| H | -5.456000 | -2.658000 | 0.198000  |
| H | -5.081000 | -4.161000 | -0.667000 |
| H | -3.226000 | -3.080000 | -1.880000 |
| H | -3.029000 | -3.505000 | 0.918000  |
| H | -3.502000 | -1.213000 | 1.389000  |
| H | -1.753000 | -0.373000 | -0.974000 |
| H | -6.058000 | 2.453000  | 0.692000  |
| H | -5.139000 | 0.209000  | 0.086000  |
| H | -2.167000 | 3.937000  | 0.028000  |
| H | -5.712000 | -2.761000 | -1.554000 |
| H | 6.372000  | 3.293000  | -0.262000 |
| H | -1.393000 | -4.014000 | -0.644000 |
| H | -0.714000 | -0.919000 | 1.059000  |
| H | 0.517000  | -2.990000 | 0.476000  |
| H | 2.785000  | 3.935000  | 0.440000  |
